# Supplementary material for: De Novo Sequencing of a Sparassis latifolia Genome and Its Associated Comparative Analyses
Source: Can J Infect Dis Med Microbiol. 2018 Feb 25;2018:1857170. doi: 10.1155/2018/1857170 (PMC5845502; doi:10.1155/2018/1857170)
Supplement: Supplementary 2 — Appendix S1: KEGG pathway classification of S. latifolia. [file 1857170.f2.xlsx]

## Sheet:  KEGG pathway classification
#pathway	pathway_id	Gene_number	Gene_id	KOs
Glycolysis / Gluconeogenesis	ko00010	41	Gglean000317.1;Gglean001195.1;Gglean001196.1;Gglean001287.1;Gglean001316.1;Gglean001902.1;Gglean002209.1;Gglean002555.1;Gglean003196.1;Gglean003197.1;Gglean003276.1;Gglean003676.1;Gglean003969.1;Gglean004264.1;Gglean004265.1;Gglean005676.1;Gglean005877.1;Gglean005897.1;Gglean006056.1;Gglean006153.1;Gglean006229.1;Gglean006559.1;Gglean007810.1;Gglean007849.1;Gglean007906.1;Gglean008036.1;Gglean008…	K01610+K14085+K14085+K00873+K00627+K00129+K00161+K00128+K00844+K00844+K00128+K01834+K01689+K01689+K01689+K13953+K01835+K00844+K00850+K13953+K00382+K00121+K01792+K01834+K00134+K01834+K03841+K13953+K01568+K01568+K00128+K01810+K01895+K00162+K00128+K01624+K00002+K00002+K01835+K00927+K01803
Citrate cycle (TCA cycle)	ko00020	27	Gglean000317.1;Gglean001238.1;Gglean001316.1;Gglean001445.1;Gglean001489.1;Gglean001780.1;Gglean002062.1;Gglean002098.1;Gglean002209.1;Gglean002260.1;Gglean003357.1;Gglean004081.1;Gglean004664.1;Gglean005354.1;Gglean005492.1;Gglean006046.1;Gglean006229.1;Gglean007011.1;Gglean007378.1;Gglean007495.1;Gglean007821.1;Gglean008947.1;Gglean009255.1;Gglean010252.1;Gglean010261.1;Gglean010354.1;Gglean012…	K01610+K00026+K00627+K01679+K01899+K00235+K01647+K00236+K00161+K01647+K00026+K01681+K01648+K01900+K00658+K01647+K00382+K01647+K00234+K01958+K01681+K00237+K00164+K00030+K00162+K00030+K00031
Pentose phosphate pathway	ko00030	22	Gglean001431.1;Gglean001492.1;Gglean001654.1;Gglean001750.1;Gglean003298.1;Gglean004936.1;Gglean005306.1;Gglean005328.1;Gglean005877.1;Gglean006056.1;Gglean008133.1;Gglean008693.1;Gglean009869.1;Gglean010467.1;Gglean010553.1;Gglean010598.1;Gglean010600.1;Gglean010989.1;Gglean011091.1;Gglean011720.1;Gglean011844.1;Gglean012203.1;	K00948+K01783+K01619+K01619+K00948+K00948+K00033+K01057+K01835+K00850+K03841+K00036+K01810+K01053+K00616+K00033+K01624+K01835+K00615+K00851+K00616+K01807
Pentose and glucuronate interconversions	ko00040	11	Gglean000263.1;Gglean000264.1;Gglean001492.1;Gglean002555.1;Gglean003276.1;Gglean008921.1;Gglean008988.1;Gglean008990.1;Gglean009669.1;Gglean009941.1;Gglean010580.1;	K00963+K00963+K01783+K00128+K00128+K00012+K00065+K00065+K00128+K00854+K00128
Fructose and mannose metabolism	ko00051	22	Gglean001530.1;Gglean003196.1;Gglean003197.1;Gglean004398.1;Gglean004576.1;Gglean004604.1;Gglean005168.1;Gglean005458.1;Gglean005459.1;Gglean005897.1;Gglean006056.1;Gglean008133.1;Gglean008220.1;Gglean008836.1;Gglean008932.1;Gglean008958.1;Gglean009252.1;Gglean010600.1;Gglean010709.1;Gglean011151.1;Gglean012176.1;Gglean012289.1;	K00971+K00844+K00844+K00100+K00100+K00100+K02377+K01103+K01103+K00844+K00850+K03841+K00100+K01711+K02377+K00008+K00971+K01624+K02377+K01103+K01803+K01809
Galactose metabolism	ko00052	19	Gglean000263.1;Gglean000264.1;Gglean002184.1;Gglean002647.1;Gglean002789.1;Gglean003196.1;Gglean003197.1;Gglean004304.1;Gglean004305.1;Gglean005322.1;Gglean005877.1;Gglean005897.1;Gglean006056.1;Gglean006870.1;Gglean010038.1;Gglean010413.1;Gglean010989.1;Gglean011134.1;Gglean012028.1;	K00963+K00963+K07407+K01187+K01684+K00844+K00844+K01784+K01784+K07407+K01835+K00844+K00850+K00849+K08302+K01187+K01835+K00965+K07407
Ascorbate and aldarate metabolism	ko00053	7	Gglean001195.1;Gglean001196.1;Gglean002555.1;Gglean003276.1;Gglean008921.1;Gglean009669.1;Gglean010580.1;	K14085+K14085+K00128+K00128+K00012+K00128+K00128
Fatty acid biosynthesis	ko00061	13	Gglean000563.1;Gglean000564.1;Gglean002448.1;Gglean002474.1;Gglean005617.1;Gglean005618.1;Gglean005623.1;Gglean005852.1;Gglean009406.1;Gglean010000.1;Gglean012109.1;Gglean012110.1;Gglean012111.1;	K00668+K00668+K00668+K00059+K00667+K00668+K00668+K00059+K11262+K00668+K00668+K00668+K00668
Fatty acid elongation in mitochondria	ko00062	2	Gglean000322.1;Gglean006087.1;	K01074+K07512
Fatty acid metabolism	ko00071	23	Gglean000034.1;Gglean001195.1;Gglean001196.1;Gglean002016.1;Gglean002017.1;Gglean002555.1;Gglean003276.1;Gglean004034.1;Gglean004075.1;Gglean005676.1;Gglean006153.1;Gglean006507.1;Gglean006508.1;Gglean006559.1;Gglean006582.1;Gglean008523.1;Gglean008526.1;Gglean008897.1;Gglean008898.1;Gglean008977.1;Gglean009669.1;Gglean010580.1;Gglean011245.1;	K01897+K14085+K14085+K00252+K00252+K00128+K00128+K01897+K00232+K13953+K13953+K00249+K00249+K00121+K00626+K00632+K00632+K01692+K01692+K13953+K00128+K00128+K14338
Synthesis and degradation of ketone bodies	ko00072	6	Gglean006582.1;Gglean007166.1;Gglean007167.1;Gglean008079.1;Gglean008129.1;Gglean008909.1;	K00626+K01641+K01641+K01027+K01027+K01640
Steroid biosynthesis	ko00100	21	Gglean001125.1;Gglean002958.1;Gglean003057.1;Gglean003058.1;Gglean003399.1;Gglean004261.1;Gglean005504.1;Gglean006377.1;Gglean006390.1;Gglean006391.1;Gglean006694.1;Gglean007287.1;Gglean007479.1;Gglean007480.1;Gglean008716.1;Gglean008949.1;Gglean009501.1;Gglean009942.1;Gglean011365.1;Gglean012124.1;Gglean012342.1;	K07748+K09830+K05917+K05917+K09831+K05917+K09829+K00511+K07750+K07750+K00637+K09827+K00223+K00223+K00222+K07750+K07748+K00801+K00559+K00559+K00559
Ubiquinone and other terpenoid-quinone biosynthesis	ko00130	5	Gglean002393.1;Gglean007104.1;Gglean009384.1;Gglean009610.1;Gglean010643.1;	K00838+K06127+K06126+K00838+K00568
Oxidative phosphorylation	ko00190	68	Gglean000393.1;Gglean000422.1;Gglean000677.1;Gglean000739.1;Gglean001353.1;Gglean001491.1;Gglean001780.1;Gglean001881.1;Gglean001915.1;Gglean001917.1;Gglean002090.1;Gglean002098.1;Gglean002173.1;Gglean002175.1;Gglean002202.1;Gglean003275.1;Gglean003561.1;Gglean003649.1;Gglean003972.1;Gglean004037.1;Gglean004157.1;Gglean004226.1;Gglean004335.1;Gglean004697.1;Gglean004983.1;Gglean005069.1;Gglean005…	K03940+K02134+K03934+K02136+K03939+K02266+K00235+K02258+K02267+K02257+K02265+K00236+K02135+K02263+K03885+K02259+K00411+K02133+K01507+K00415+K02264+K03935+K03661+K03950+K02154+K01535+K01535+K03936+K02148+K03964+K02137+K02138+K02152+K02127+K00234+K02269+K02132+K03949+K03955+K03941+K11353+K02149+K03965+K00419+K02155+K02146+K02147+K00237+K03938+K02155+K02269+K03937+K02141+K02140+K03952+K02150+K00413+…
Purine metabolism	ko00230	88	Gglean000164.1;Gglean000416.1;Gglean000427.1;Gglean000435.1;Gglean000534.1;Gglean000742.1;Gglean001051.1;Gglean001186.1;Gglean001287.1;Gglean001431.1;Gglean001505.1;Gglean001955.1;Gglean002037.1;Gglean002308.1;Gglean002477.1;Gglean002664.1;Gglean002665.1;Gglean002675.1;Gglean002948.1;Gglean003099.1;Gglean003298.1;Gglean003326.1;Gglean003383.1;Gglean003526.1;Gglean003665.1;Gglean003778.1;Gglean004…	K03011+K03006+K01477+K00958+K01951+K02320+K03505+K01514+K00873+K00948+K11788+K03017+K03027+K02685+K03000+K03006+K03006+K01488+K03013+K01427+K00948+K00088+K01939+K14721+K00856+K00764+K03014+K03010+K01522+K07127+K01768+K03021+K03005+K03005+K00939+K00948+K03007+K03008+K03024+K01515+K02320+K02324+K01835+K00860+K00759+K02327+K02327+K00942+K03026+K03022+K03006+K03002+K02999+K01923+K02320+K03016+K00601+…
Pyrimidine metabolism	ko00240	74	Gglean000164.1;Gglean000324.1;Gglean000416.1;Gglean000483.1;Gglean000742.1;Gglean000782.1;Gglean000819.1;Gglean001051.1;Gglean001139.1;Gglean001955.1;Gglean002037.1;Gglean002088.1;Gglean002308.1;Gglean002477.1;Gglean002572.1;Gglean002594.1;Gglean002604.1;Gglean002605.1;Gglean002664.1;Gglean002665.1;Gglean002948.1;Gglean003526.1;Gglean004000.1;Gglean004109.1;Gglean004782.1;Gglean004817.1;Gglean004…	K03011+K01956+K03006+K01955+K02320+K01937+K00762+K03505+K00560+K03017+K03027+K00876+K02685+K03000+K00757+K00757+K01485+K01485+K03006+K03006+K03013+K14721+K03014+K03010+K03021+K03005+K03005+K03007+K03008+K03024+K02320+K02324+K11541+K00761+K01520+K00226+K02327+K02327+K03026+K00943+K03022+K03006+K03002+K02999+K02320+K00943+K03016+K03025+K14721+K03018+K03783+K00226+K02321+K00384+K10807+K01465+K03019+…
Alanine, aspartate and glutamate metabolism	ko00250	26	Gglean000324.1;Gglean000417.1;Gglean000418.1;Gglean000483.1;Gglean002283.1;Gglean002287.1;Gglean002298.1;Gglean002850.1;Gglean003383.1;Gglean003778.1;Gglean006311.1;Gglean006753.1;Gglean007031.1;Gglean007868.1;Gglean008121.1;Gglean008152.1;Gglean008855.1;Gglean009457.1;Gglean009458.1;Gglean009621.1;Gglean009951.1;Gglean010005.1;Gglean010094.1;Gglean010360.1;Gglean011088.1;Gglean011149.1;	K01956+K00823+K00823+K01955+K01755+K14454+K01953+K00820+K01939+K00764+K11541+K00830+K00260+K14455+K00264+K01915+K00814+K00260+K00260+K00135+K01940+K01756+K00294+K01915+K01580+K13566
Glycine, serine and threonine metabolism	ko00260	30	Gglean000572.1;Gglean000827.1;Gglean000965.1;Gglean001195.1;Gglean001196.1;Gglean001199.1;Gglean001401.1;Gglean001542.1;Gglean001710.1;Gglean002237.1;Gglean002309.1;Gglean002406.1;Gglean003568.1;Gglean005290.1;Gglean005501.1;Gglean005740.1;Gglean006229.1;Gglean006451.1;Gglean006488.1;Gglean006682.1;Gglean006753.1;Gglean007236.1;Gglean008631.1;Gglean009872.1;Gglean010800.1;Gglean010804.1;Gglean011…	K00108+K00928+K00872+K14085+K14085+K01733+K00058+K00281+K00276+K00831+K00998+K01694+K00872+K01620+K00003+K00600+K00382+K00276+K01754+K01697+K00830+K00872+K00643+K01758+K00605+K00108+K00108+K00133+K01754+K01754
Cysteine and methionine metabolism	ko00270	34	Gglean000243.1;Gglean000244.1;Gglean000323.1;Gglean000355.1;Gglean000428.1;Gglean000827.1;Gglean002165.1;Gglean002287.1;Gglean002354.1;Gglean002393.1;Gglean002532.1;Gglean002758.1;Gglean003026.1;Gglean003086.1;Gglean003155.1;Gglean003771.1;Gglean004420.1;Gglean004452.1;Gglean004585.1;Gglean005083.1;Gglean005294.1;Gglean005501.1;Gglean006071.1;Gglean006072.1;Gglean006414.1;Gglean006682.1;Gglean007…	K01611+K01611+K00641+K01611+K08963+K00928+K00789+K14454+K00558+K00838+K00558+K00789+K01740+K00641+K00772+K08967+K00547+K01738+K01251+K01739+K01011+K00003+K00558+K00558+K00797+K01697+K14455+K00641+K00838+K01758+K00549+K00133+K00641+K01738
Valine, leucine and isoleucine degradation	ko00280	30	Gglean000637.1;Gglean001195.1;Gglean001196.1;Gglean002347.1;Gglean002555.1;Gglean002671.1;Gglean003276.1;Gglean004017.1;Gglean006229.1;Gglean006507.1;Gglean006508.1;Gglean006582.1;Gglean007166.1;Gglean007167.1;Gglean007239.1;Gglean007453.1;Gglean007779.1;Gglean008079.1;Gglean008129.1;Gglean008523.1;Gglean008526.1;Gglean008644.1;Gglean008897.1;Gglean008898.1;Gglean008907.1;Gglean008909.1;Gglean009…	K00020+K14085+K14085+K00167+K00128+K09699+K00128+K00166+K00382+K00249+K00249+K00626+K01641+K01641+K00166+K05607+K00140+K01027+K01027+K00632+K00632+K01969+K01692+K01692+K01640+K01640+K00128+K00128+K00166+K01968
Valine, leucine and isoleucine biosynthesis	ko00290	24	Gglean000375.1;Gglean001113.1;Gglean001988.1;Gglean002169.1;Gglean002170.1;Gglean002209.1;Gglean002377.1;Gglean002432.1;Gglean003282.1;Gglean004786.1;Gglean006244.1;Gglean006488.1;Gglean007295.1;Gglean007972.1;Gglean009028.1;Gglean009244.1;Gglean009245.1;Gglean009839.1;Gglean010261.1;Gglean011494.1;Gglean011723.1;Gglean011724.1;Gglean011840.1;Gglean012441.1;	K01870+K01870+K01870+K01649+K01649+K00161+K01652+K01870+K01702+K01869+K01873+K01754+K01649+K00052+K01873+K01870+K01653+K01687+K00162+K00053+K01754+K01754+K01870+K01873
Lysine biosynthesis	ko00300	14	Gglean000785.1;Gglean000827.1;Gglean001195.1;Gglean001196.1;Gglean001346.1;Gglean002393.1;Gglean003087.1;Gglean005501.1;Gglean006245.1;Gglean006246.1;Gglean008634.1;Gglean009610.1;Gglean011227.1;Gglean011454.1;	K00143+K00928+K14085+K14085+K00290+K00838+K01655+K00003+K14157+K14157+K05824+K00838+K01705+K00133
Lysine degradation	ko00310	24	Gglean000266.1;Gglean000785.1;Gglean001191.1;Gglean001195.1;Gglean001196.1;Gglean001346.1;Gglean002016.1;Gglean002017.1;Gglean002555.1;Gglean002633.1;Gglean003276.1;Gglean004699.1;Gglean004700.1;Gglean004820.1;Gglean005492.1;Gglean006245.1;Gglean006246.1;Gglean006582.1;Gglean008897.1;Gglean008898.1;Gglean009255.1;Gglean009669.1;Gglean010580.1;Gglean011911.1;	K11429+K00143+K11422+K14085+K14085+K00290+K00252+K00252+K00128+K11427+K00128+K11423+K11423+K11423+K00658+K14157+K14157+K00626+K01692+K01692+K00164+K00128+K00128+K11422
Penicillin and cephalosporin biosynthesis	ko00311	1	Gglean011837.1;	K10852
Arginine and proline metabolism	ko00330	47	Gglean000243.1;Gglean000244.1;Gglean000355.1;Gglean000426.1;Gglean001195.1;Gglean001196.1;Gglean001447.1;Gglean001448.1;Gglean002224.1;Gglean002283.1;Gglean002287.1;Gglean002555.1;Gglean002604.1;Gglean002605.1;Gglean002659.1;Gglean002666.1;Gglean003038.1;Gglean003039.1;Gglean003099.1;Gglean003276.1;Gglean003371.1;Gglean003642.1;Gglean003798.1;Gglean003990.1;Gglean004935.1;Gglean005018.1;Gglean005…	K01611+K01611+K01611+K01426+K14085+K14085+K01426+K01426+K00286+K01755+K14454+K00128+K01485+K01485+K00318+K01426+K01259+K01259+K01427+K00128+K01426+K01476+K01476+K01480+K00931+K01480+K12659+K12659+K00611+K00797+K00260+K01581+K00618+K14455+K00819+K01915+K00818+K00620+K00147+K00260+K00260+K00128+K01940+K00294+K01915+K00128+K01480
Histidine metabolism	ko00340	25	Gglean000123.1;Gglean000706.1;Gglean001195.1;Gglean001196.1;Gglean001242.1;Gglean001385.1;Gglean001480.1;Gglean001902.1;Gglean002555.1;Gglean003276.1;Gglean003838.1;Gglean003839.1;Gglean005640.1;Gglean005641.1;Gglean005738.1;Gglean008117.1;Gglean009420.1;Gglean009421.1;Gglean009669.1;Gglean010351.1;Gglean010580.1;Gglean011184.1;Gglean011877.1;Gglean011878.1;Gglean012047.1;	K00599+K01814+K14085+K14085+K04486+K01663+K00599+K00129+K00128+K00128+K00765+K00765+K00817+K00817+K00817+K01693+K00599+K00599+K00128+K14152+K00128+K00765+K01593+K01593+K04486
Tyrosine metabolism	ko00350	24	Gglean000123.1;Gglean001480.1;Gglean001710.1;Gglean001902.1;Gglean002287.1;Gglean002393.1;Gglean005640.1;Gglean005641.1;Gglean005676.1;Gglean005738.1;Gglean006153.1;Gglean006451.1;Gglean006559.1;Gglean007868.1;Gglean008977.1;Gglean009420.1;Gglean009421.1;Gglean009610.1;Gglean009621.1;Gglean009863.1;Gglean011195.1;Gglean011237.1;Gglean011877.1;Gglean011878.1;	K00599+K00599+K00276+K00129+K14454+K00838+K00817+K00817+K13953+K00817+K13953+K00276+K00121+K14455+K13953+K00599+K00599+K00838+K00135+K02510+K00451+K00451+K01593+K01593
Phenylalanine metabolism	ko00360	17	Gglean000426.1;Gglean001447.1;Gglean001448.1;Gglean001710.1;Gglean001902.1;Gglean002287.1;Gglean002393.1;Gglean002666.1;Gglean003371.1;Gglean005640.1;Gglean005641.1;Gglean005738.1;Gglean006451.1;Gglean007868.1;Gglean009610.1;Gglean011877.1;Gglean011878.1;	K01426+K01426+K01426+K00276+K00129+K14454+K00838+K01426+K01426+K00817+K00817+K00817+K00276+K14455+K00838+K01593+K01593
Tryptophan metabolism	ko00380	37	Gglean000426.1;Gglean001195.1;Gglean001196.1;Gglean001447.1;Gglean001448.1;Gglean001645.1;Gglean002016.1;Gglean002017.1;Gglean002264.1;Gglean002270.1;Gglean002393.1;Gglean002555.1;Gglean002666.1;Gglean003276.1;Gglean003371.1;Gglean003618.1;Gglean004683.1;Gglean004884.1;Gglean004948.1;Gglean005374.1;Gglean005673.1;Gglean006028.1;Gglean006034.1;Gglean006444.1;Gglean006582.1;Gglean006844.1;Gglean008…	K01426+K14085+K14085+K01426+K01426+K03781+K00252+K00252+K00486+K01556+K00838+K00128+K01426+K00128+K01426+K00463+K14264+K01867+K01867+K03781+K00452+K14265+K14265+K14265+K00626+K00463+K03781+K01692+K01692+K00164+K00838+K00128+K14264+K00128+K14338+K01593+K01593
Phenylalanine, tyrosine and tryptophan biosynthesis	ko00400	19	Gglean001923.1;Gglean002187.1;Gglean002287.1;Gglean002393.1;Gglean002406.1;Gglean004709.1;Gglean005601.1;Gglean005640.1;Gglean005641.1;Gglean005738.1;Gglean006492.1;Gglean007868.1;Gglean008818.1;Gglean009169.1;Gglean009610.1;Gglean009837.1;Gglean011033.1;Gglean012213.1;Gglean012214.1;	K13501+K00211+K14454+K00838+K01694+K01626+K01736+K00817+K00817+K00817+K01626+K14455+K01626+K00766+K00838+K01850+K01657+K13830+K13830
beta-Alanine metabolism	ko00410	17	Gglean000417.1;Gglean000418.1;Gglean001195.1;Gglean001196.1;Gglean001710.1;Gglean002555.1;Gglean003276.1;Gglean006414.1;Gglean006451.1;Gglean006507.1;Gglean006508.1;Gglean007174.1;Gglean008897.1;Gglean008898.1;Gglean009669.1;Gglean010580.1;Gglean011088.1;	K00823+K00823+K14085+K14085+K00276+K00128+K00128+K00797+K00276+K00249+K00249+K01918+K01692+K01692+K00128+K00128+K01580
Taurine and hypotaurine metabolism	ko00430	4	Gglean000387.1;Gglean001472.1;Gglean005938.1;Gglean011088.1;	K00681+K00681+K00925+K01580
Selenocompound metabolism	ko00450	7	Gglean000435.1;Gglean005083.1;Gglean006494.1;Gglean007728.1;Gglean009483.1;Gglean009872.1;Gglean010344.1;	K00958+K01739+K01874+K01874+K00384+K01758+K00549
Cyanoamino acid metabolism	ko00460	12	Gglean000387.1;Gglean000426.1;Gglean001447.1;Gglean001448.1;Gglean001472.1;Gglean001926.1;Gglean002666.1;Gglean003371.1;Gglean005740.1;Gglean007310.1;Gglean010181.1;Gglean010977.1;	K00681+K01426+K01426+K01426+K00681+K05349+K01426+K01426+K00600+K05349+K05349+K05349
Glutathione metabolism	ko00480	34	Gglean000186.1;Gglean000387.1;Gglean001472.1;Gglean002428.1;Gglean004891.1;Gglean005306.1;Gglean005505.1;Gglean005726.1;Gglean005984.1;Gglean006295.1;Gglean006414.1;Gglean006478.1;Gglean006498.1;Gglean006966.1;Gglean006967.1;Gglean006968.1;Gglean007550.1;Gglean007693.1;Gglean007937.1;Gglean008693.1;Gglean009093.1;Gglean009094.1;Gglean009504.1;Gglean010245.1;Gglean010365.1;Gglean010598.1;Gglean010…	K11204+K00681+K00681+K00799+K00383+K00033+K00799+K01469+K00432+K01469+K00797+K00799+K00799+K00799+K00799+K00799+K00799+K01581+K00799+K00036+K00799+K00799+K10807+K10808+K10808+K00033+K01920+K00799+K00799+K00799+K00799+K00799+K00799+K00031
Starch and sucrose metabolism	ko00500	45	Gglean000090.1;Gglean000263.1;Gglean000264.1;Gglean001637.1;Gglean001873.1;Gglean001926.1;Gglean001948.1;Gglean001949.1;Gglean001950.1;Gglean002126.1;Gglean002647.1;Gglean002986.1;Gglean002987.1;Gglean003196.1;Gglean003197.1;Gglean003356.1;Gglean004172.1;Gglean004301.1;Gglean004685.1;Gglean005096.1;Gglean005877.1;Gglean005897.1;Gglean006059.1;Gglean006332.1;Gglean006676.1;Gglean006995.1;Gglean007…	K01194+K00963+K00963+K01178+K01176+K05349+K01210+K01210+K01210+K01178+K01187+K00697+K00697+K00844+K00844+K01210+K01210+K01178+K01176+K00697+K01835+K00844+K01210+K00693+K01196+K01178+K05349+K01178+K00706+K01210+K00700+K00706+K01178+K00012+K01194+K01810+K05349+K01187+K01178+K05349+K01835+K01176+K00697+K00688+K01178
N-Glycan biosynthesis	ko00510	32	Gglean000510.1;Gglean001080.1;Gglean001081.1;Gglean001702.1;Gglean002014.1;Gglean002263.1;Gglean002279.1;Gglean002339.1;Gglean002515.1;Gglean003246.1;Gglean003443.1;Gglean003869.1;Gglean003870.1;Gglean004568.1;Gglean004939.1;Gglean004981.1;Gglean005441.1;Gglean005588.1;Gglean005718.1;Gglean005770.1;Gglean006369.1;Gglean007175.1;Gglean009136.1;Gglean009309.1;Gglean009426.1;Gglean009427.1;Gglean009…	K07441+K07151+K07151+K01230+K05546+K12669+K03845+K07432+K03842+K12668+K03850+K01230+K01230+K01230+K03843+K12670+K01230+K12667+K00721+K03846+K06316+K07252+K01230+K03844+K01230+K01230+K01001+K03848+K03849+K12666+K00729+K01228
Other glycan degradation	ko00511	11	Gglean003337.1;Gglean003338.1;Gglean003823.1;Gglean003859.1;Gglean006019.1;Gglean009459.1;Gglean009463.1;Gglean009464.1;Gglean010379.1;Gglean010380.1;Gglean011688.1;	K01227+K01227+K01192+K12373+K01191+K01192+K12373+K12373+K01192+K01192+K01192
Various types of N-glycan biosynthesis	ko00513	22	Gglean000510.1;Gglean001080.1;Gglean001081.1;Gglean001702.1;Gglean002263.1;Gglean002279.1;Gglean002339.1;Gglean002515.1;Gglean003246.1;Gglean003869.1;Gglean003870.1;Gglean004568.1;Gglean004939.1;Gglean004981.1;Gglean005441.1;Gglean005588.1;Gglean005770.1;Gglean009136.1;Gglean009309.1;Gglean009426.1;Gglean009427.1;Gglean010317.1;	K07441+K07151+K07151+K01230+K12669+K03845+K07432+K03842+K12668+K01230+K01230+K01230+K03843+K12670+K01230+K12667+K03846+K01230+K03844+K01230+K01230+K12666
Other types of O-glycan biosynthesis	ko00514	6	Gglean002177.1;Gglean002262.1;Gglean006427.1;Gglean006443.1;Gglean007477.1;Gglean012334.1;	K00728+K10967+K10967+K10967+K00728+K00728
Amino sugar and nucleotide sugar metabolism	ko00520	55	Gglean000169.1;Gglean000263.1;Gglean000264.1;Gglean000305.1;Gglean001216.1;Gglean001375.1;Gglean001530.1;Gglean001643.1;Gglean001959.1;Gglean002850.1;Gglean003066.1;Gglean003196.1;Gglean003197.1;Gglean003844.1;Gglean003859.1;Gglean003932.1;Gglean003954.1;Gglean004304.1;Gglean004305.1;Gglean004351.1;Gglean004714.1;Gglean005092.1;Gglean005168.1;Gglean005365.1;Gglean005592.1;Gglean005724.1;Gglean005…	K01183+K00963+K00963+K00698+K00698+K01836+K00971+K01183+K01443+K00820+K01183+K00844+K00844+K00698+K12373+K00698+K00972+K01784+K01784+K02564+K01207+K00698+K02377+K01183+K00698+K00621+K01183+K01835+K00844+K01183+K01183+K00698+K00849+K00698+K00326+K00698+K01183+K01183+K01711+K00012+K02377+K00971+K12373+K12373+K01810+K00698+K01183+K00326+K02377+K00698+K01835+K00965+K01809+K00326+K01183
Glycosaminoglycan degradation	ko00531	3	Gglean003859.1;Gglean009463.1;Gglean009464.1;	K12373+K12373+K12373
Glycerolipid metabolism	ko00561	22	Gglean000054.1;Gglean000055.1;Gglean001195.1;Gglean001196.1;Gglean001278.1;Gglean002184.1;Gglean002555.1;Gglean003276.1;Gglean005322.1;Gglean006009.1;Gglean006010.1;Gglean006553.1;Gglean008193.1;Gglean009345.1;Gglean009428.1;Gglean009643.1;Gglean009669.1;Gglean010580.1;Gglean010623.1;Gglean010668.1;Gglean010669.1;Gglean012028.1;	K13507+K13507+K14085+K14085+K01046+K07407+K00128+K00128+K07407+K00679+K00679+K13519+K13507+K01046+K00864+K13509+K00128+K00128+K00863+K00002+K00002+K07407
Inositol phosphate metabolism	ko00562	14	Gglean001168.1;Gglean001979.1;Gglean002303.1;Gglean002304.1;Gglean003840.1;Gglean003912.1;Gglean005005.1;Gglean005098.1;Gglean007779.1;Gglean008030.1;Gglean010026.1;Gglean011480.1;Gglean011942.1;Gglean012176.1;	K01099+K01858+K00999+K00888+K01092+K00921+K01771+K01771+K00140+K00888+K00889+K00914+K01116+K01803
Glycosylphosphatidylinositol(GPI)-anchor biosynthesis	ko00563	20	Gglean000292.1;Gglean000807.1;Gglean001178.1;Gglean001182.1;Gglean001332.1;Gglean002773.1;Gglean002814.1;Gglean003112.1;Gglean003113.1;Gglean004747.1;Gglean004748.1;Gglean004749.1;Gglean005462.1;Gglean005484.1;Gglean008006.1;Gglean008038.1;Gglean008057.1;Gglean009304.1;Gglean010699.1;Gglean012053.1;	K07542+K03857+K05283+K08098+K03859+K05288+K05288+K05292+K05292+K05285+K05285+K05285+K03434+K05291+K05289+K05286+K05284+K05293+K05292+K03860
Glycerophospholipid metabolism	ko00564	27	Gglean000054.1;Gglean000055.1;Gglean001613.1;Gglean001942.1;Gglean001943.1;Gglean002303.1;Gglean002309.1;Gglean002361.1;Gglean002638.1;Gglean003019.1;Gglean003933.1;Gglean003963.1;Gglean004795.1;Gglean005267.1;Gglean005497.1;Gglean006416.1;Gglean006553.1;Gglean006856.1;Gglean007160.1;Gglean008193.1;Gglean008661.1;Gglean009642.1;Gglean009643.1;Gglean009754.1;Gglean010848.1;Gglean011726.1;Gglean012…	K13507+K13507+K00111+K01613+K01613+K00999+K00998+K00995+K13333+K13511+K14676+K00993+K00968+K00866+K13621+K01115+K13519+K01613+K08744+K13507+K13535+K01126+K13509+K08730+K13333+K00981+K01613
Ether lipid metabolism	ko00565	4	Gglean003784.1;Gglean003963.1;Gglean006416.1;Gglean006553.1;	K01062+K00993+K01115+K13519
Arachidonic acid metabolism	ko00590	6	Gglean000387.1;Gglean001472.1;Gglean002673.1;Gglean005688.1;Gglean005984.1;Gglean006788.1;	K00681+K00681+K01254+K11987+K00432+K11987
Linoleic acid metabolism	ko00591	4	Gglean004398.1;Gglean004576.1;Gglean004604.1;Gglean008220.1;	K00100+K00100+K00100+K00100
alpha-Linolenic acid metabolism	ko00592	3	Gglean004075.1;Gglean008523.1;Gglean008526.1;	K00232+K00632+K00632
Sphingolipid metabolism	ko00600	14	Gglean001525.1;Gglean001526.1;Gglean002184.1;Gglean002345.1;Gglean002346.1;Gglean004174.1;Gglean005611.1;Gglean005823.1;Gglean006695.1;Gglean006699.1;Gglean008920.1;Gglean010046.1;Gglean010683.1;Gglean011710.1;	K00720+K00720+K07407+K04718+K04718+K04711+K04712+K00654+K04713+K04713+K00654+K04718+K12350+K01634
Glycosphingolipid biosynthesis - globo series	ko00603	6	Gglean002184.1;Gglean003859.1;Gglean005322.1;Gglean009463.1;Gglean009464.1;Gglean012028.1;	K07407+K12373+K07407+K12373+K12373+K07407
Pyruvate metabolism	ko00620	39	Gglean000317.1;Gglean000629.1;Gglean000842.1;Gglean000843.1;Gglean001195.1;Gglean001196.1;Gglean001238.1;Gglean001287.1;Gglean001316.1;Gglean001970.1;Gglean001971.1;Gglean002169.1;Gglean002170.1;Gglean002209.1;Gglean002555.1;Gglean003087.1;Gglean003276.1;Gglean003357.1;Gglean003655.1;Gglean003657.1;Gglean003658.1;Gglean004544.1;Gglean004616.1;Gglean005938.1;Gglean006229.1;Gglean006582.1;Gglean007…	K01610+K01069+K00102+K00102+K14085+K14085+K00026+K00873+K00627+K01512+K01512+K01649+K01649+K00161+K00128+K01655+K00128+K00026+K00027+K00027+K00027+K00101+K00101+K00925+K00382+K00626+K01649+K01958+K00102+K00029+K11262+K00128+K01895+K00162+K00128+K01759+K01759+K01638+K00101
Glyoxylate and dicarboxylate metabolism	ko00630	15	Gglean001238.1;Gglean001897.1;Gglean002062.1;Gglean002260.1;Gglean003357.1;Gglean004081.1;Gglean004193.1;Gglean006046.1;Gglean006582.1;Gglean007011.1;Gglean007821.1;Gglean009775.1;Gglean011209.1;Gglean011743.1;Gglean011751.1;	K00026+K01455+K01647+K01647+K00026+K01681+K01637+K01647+K00626+K01647+K01681+K01637+K00122+K01638+K00122
Propanoate metabolism	ko00640	21	Gglean000417.1;Gglean000418.1;Gglean000441.1;Gglean001195.1;Gglean001196.1;Gglean001489.1;Gglean002555.1;Gglean003276.1;Gglean005354.1;Gglean005938.1;Gglean006507.1;Gglean006508.1;Gglean006582.1;Gglean007020.1;Gglean007779.1;Gglean008897.1;Gglean008898.1;Gglean009406.1;Gglean009669.1;Gglean009963.1;Gglean010580.1;	K00823+K00823+K01720+K14085+K14085+K01899+K00128+K00128+K01900+K00925+K00249+K00249+K00626+K01720+K00140+K01692+K01692+K11262+K00128+K01895+K00128
Butanoate metabolism	ko00650	24	Gglean000417.1;Gglean000418.1;Gglean000765.1;Gglean002209.1;Gglean002377.1;Gglean004398.1;Gglean004576.1;Gglean004604.1;Gglean006582.1;Gglean007166.1;Gglean007167.1;Gglean008079.1;Gglean008129.1;Gglean008220.1;Gglean008688.1;Gglean008897.1;Gglean008898.1;Gglean008907.1;Gglean008909.1;Gglean009245.1;Gglean009621.1;Gglean010261.1;Gglean011088.1;Gglean011641.1;	K00823+K00823+K00074+K00161+K01652+K00100+K00100+K00100+K00626+K01641+K01641+K01027+K01027+K00100+K01907+K01692+K01692+K01640+K01640+K01653+K00135+K00162+K01580+K01907
One carbon pool by folate	ko00670	12	Gglean001139.1;Gglean001363.1;Gglean002215.1;Gglean002216.1;Gglean005740.1;Gglean007757.1;Gglean008135.1;Gglean009313.1;Gglean009586.1;Gglean009922.1;Gglean009955.1;Gglean010800.1;	K00560+K00287+K00297+K00297+K00600+K00601+K00288+K00604+K00295+K00297+K00602+K00605
Methane metabolism	ko00680	26	Gglean001279.1;Gglean001401.1;Gglean001645.1;Gglean002215.1;Gglean002216.1;Gglean002237.1;Gglean003676.1;Gglean003969.1;Gglean004264.1;Gglean004265.1;Gglean005374.1;Gglean005740.1;Gglean005938.1;Gglean006056.1;Gglean006559.1;Gglean006753.1;Gglean007849.1;Gglean008036.1;Gglean008133.1;Gglean008291.1;Gglean009922.1;Gglean009963.1;Gglean010600.1;Gglean010623.1;Gglean011209.1;Gglean011751.1;	K01070+K00058+K03781+K00297+K00297+K00831+K01834+K01689+K01689+K01689+K03781+K00600+K00925+K00850+K00121+K00830+K01834+K01834+K03841+K03781+K00297+K01895+K01624+K00863+K00122+K00122
Thiamine metabolism	ko00730	5	Gglean000221.1;Gglean002219.1;Gglean004947.1;Gglean006940.1;Gglean008431.1;	K14154+K04487+K00877+K04487+K00949
Riboflavin metabolism	ko00740	15	Gglean000798.1;Gglean001235.1;Gglean001946.1;Gglean002113.1;Gglean003705.1;Gglean003780.1;Gglean004095.1;Gglean004096.1;Gglean004233.1;Gglean004236.1;Gglean005932.1;Gglean008223.1;Gglean008588.1;Gglean008628.1;Gglean009518.1;	K01078+K01078+K01078+K01078+K00793+K00794+K01078+K01078+K14654+K14654+K14394+K01497+K02858+K00861+K01078
Vitamin B6 metabolism	ko00750	6	Gglean000029.1;Gglean001199.1;Gglean002237.1;Gglean003340.1;Gglean007125.1;Gglean011614.1;	K06215+K01733+K00831+K08681+K00868+K13248
Nicotinate and nicotinamide metabolism	ko00760	6	Gglean001960.1;Gglean002076.1;Gglean007450.1;Gglean008186.1;Gglean008379.1;Gglean009382.1;	K06210+K00763+K00767+K00323+K03783+K01950
Pantothenate and CoA biosynthesis	ko00770	14	Gglean001260.1;Gglean002027.1;Gglean002360.1;Gglean002377.1;Gglean002732.1;Gglean002733.1;Gglean004190.1;Gglean006623.1;Gglean007064.1;Gglean007174.1;Gglean009245.1;Gglean009839.1;Gglean011404.1;Gglean011494.1;	K00077+K00606+K00859+K01652+K01922+K01922+K09680+K00997+K01598+K01918+K01653+K01687+K00077+K00053
Biotin metabolism	ko00780	3	Gglean005353.1;Gglean011380.1;Gglean011505.1;	K01012+K01942+K00833
Lipoic acid metabolism	ko00785	3	Gglean001343.1;Gglean003411.1;Gglean010235.1;	K03644+K03801+K03800
Folate biosynthesis	ko00790	7	Gglean001185.1;Gglean001266.1;Gglean001363.1;Gglean009724.1;Gglean010975.1;Gglean011965.1;Gglean012089.1;	K13939+K13950+K00287+K01930+K01113+K01495+K01930
Porphyrin and chlorophyll metabolism	ko00860	18	Gglean000455.1;Gglean000633.1;Gglean001917.1;Gglean002273.1;Gglean002391.1;Gglean002643.1;Gglean002677.1;Gglean002795.1;Gglean003275.1;Gglean003285.1;Gglean004165.1;Gglean007484.1;Gglean008631.1;Gglean009024.1;Gglean010042.1;Gglean010739.1;Gglean011037.1;Gglean011071.1;	K01772+K01764+K02257+K00228+K01885+K01749+K01885+K00231+K02259+K01599+K00589+K01764+K00643+K01885+K01719+K00228+K02304+K02304
Terpenoid backbone biosynthesis	ko00900	16	Gglean000456.1;Gglean000457.1;Gglean000823.1;Gglean000824.1;Gglean001358.1;Gglean002785.1;Gglean004204.1;Gglean006351.1;Gglean006352.1;Gglean006582.1;Gglean007166.1;Gglean007167.1;Gglean010851.1;Gglean011667.1;Gglean011737.1;Gglean011738.1;	K00938+K00938+K00021+K00021+K01823+K00804+K05355+K00787+K00787+K00626+K01641+K01641+K11778+K01597+K00804+K00804
Nitrogen metabolism	ko00910	15	Gglean001897.1;Gglean002298.1;Gglean002570.1;Gglean002596.1;Gglean007031.1;Gglean008121.1;Gglean008152.1;Gglean008456.1;Gglean009457.1;Gglean009458.1;Gglean009872.1;Gglean010360.1;Gglean010800.1;Gglean011232.1;Gglean012076.1;	K01455+K01953+K10534+K00362+K00260+K00264+K01915+K01673+K00260+K00260+K01758+K01915+K00605+K01725+K01673
Sulfur metabolism	ko00920	15	Gglean000323.1;Gglean000435.1;Gglean003086.1;Gglean004452.1;Gglean005083.1;Gglean005996.1;Gglean006086.1;Gglean006543.1;Gglean006711.1;Gglean007485.1;Gglean008208.1;Gglean009623.1;Gglean009750.1;Gglean011727.1;Gglean011764.1;	K00641+K00958+K00641+K01738+K01739+K00860+K01082+K00380+K00381+K01082+K00641+K00390+K00387+K00641+K01738
Aminoacyl-tRNA biosynthesis	ko00970	43	Gglean000135.1;Gglean000363.1;Gglean000375.1;Gglean000705.1;Gglean000858.1;Gglean001113.1;Gglean001114.1;Gglean001849.1;Gglean001977.1;Gglean001988.1;Gglean002391.1;Gglean002432.1;Gglean002677.1;Gglean003105.1;Gglean003964.1;Gglean004123.1;Gglean004444.1;Gglean004477.1;Gglean004478.1;Gglean004786.1;Gglean004884.1;Gglean004948.1;Gglean006244.1;Gglean006267.1;Gglean006494.1;Gglean006501.1;Gglean007…	K01866+K01872+K01870+K01875+K02433+K01870+K01881+K01876+K01893+K01870+K01885+K01870+K01885+K01876+K01892+K01875+K01883+K04567+K04567+K01869+K01867+K01867+K01873+K01866+K01874+K01876+K01886+K01874+K01876+K01889+K01885+K01873+K01893+K01870+K00604+K02434+K01890+K01876+K01868+K01870+K01889+K01880+K01873
Biosynthesis of unsaturated fatty acids	ko01040	16	Gglean000957.1;Gglean000970.1;Gglean001800.1;Gglean002474.1;Gglean004075.1;Gglean004396.1;Gglean004571.1;Gglean004606.1;Gglean004941.1;Gglean005852.1;Gglean007626.1;Gglean008867.1;Gglean009507.1;Gglean009937.1;Gglean009959.1;Gglean011605.1;	K10256+K10256+K10251+K00059+K00232+K10256+K00507+K00507+K10256+K00059+K10258+K10256+K10256+K00507+K00507+K10703
ABC transporters	ko02010	5	Gglean003450.1;Gglean003801.1;Gglean008547.1;Gglean008548.1;Gglean008549.1;	K05676+K05663+K05658+K05658+K05658
Ribosome biogenesis in eukaryotes	ko03008	76	Gglean000066.1;Gglean000069.1;Gglean000089.1;Gglean000333.1;Gglean000336.1;Gglean000532.1;Gglean000533.1;Gglean000592.1;Gglean000614.1;Gglean000929.1;Gglean001062.1;Gglean001122.1;Gglean001259.1;Gglean001449.1;Gglean001462.1;Gglean001496.1;Gglean002079.1;Gglean002087.1;Gglean002176.1;Gglean002469.1;Gglean002632.1;Gglean002857.1;Gglean003164.1;Gglean003234.1;Gglean003297.1;Gglean003323.1;Gglean003…	K02218+K14556+K03264+K14566+K13288+K12618+K12618+K07936+K03538+K14544+K03097+K02218+K14552+K14559+K07179+K14539+K14571+K03115+K14563+K14553+K14574+K14558+K14563+K14565+K14538+K14560+K14285+K14567+K14537+K02218+K14555+K06943+K02218+K14550+K14570+K02218+K14548+K03097+K02218+K03539+K14538+K14538+K14572+K14521+K14521+K14530+K03537+K14535+K11131+K12845+K11108+K14554+K14554+K14554+K11883+K14284+K12619+…
Ribosome	ko03010	75	Gglean000091.1;Gglean000236.1;Gglean000265.1;Gglean000486.1;Gglean000670.1;Gglean000734.1;Gglean001010.1;Gglean001025.1;Gglean001233.1;Gglean001336.1;Gglean001344.1;Gglean001349.1;Gglean001386.1;Gglean001402.1;Gglean001426.1;Gglean001646.1;Gglean001836.1;Gglean002332.1;Gglean002650.1;Gglean002769.1;Gglean002819.1;Gglean002994.1;Gglean003180.1;Gglean003195.1;Gglean003686.1;Gglean003802.1;Gglean003…	K02969+K02964+K02995+K02989+K02910+K02901+K02977+K02987+K02915+K02877+K02979+K02974+K02873+K02960+K02949+K02894+K02936+K02971+K02885+K02953+K02991+K02941+K02938+K02883+K02927+K02947+K02997+K02863+K02889+K02903+K02998+K02942+K02900+K02988+K02929+K02955+K02896+K02976+K02930+K02962+K02984+K02957+K02943+K02908+K02958+K02868+K02922+K02891+K02974+K02872+K02912+K02985+K02896+K02937+K02898+K02952+K02870+…
RNA transport	ko03013	117	Gglean000007.1;Gglean000096.1;Gglean000335.1;Gglean000567.1;Gglean000592.1;Gglean000612.1;Gglean000614.1;Gglean000737.1;Gglean000778.1;Gglean000779.1;Gglean001166.1;Gglean001388.1;Gglean001464.1;Gglean001620.1;Gglean002006.1;Gglean002066.1;Gglean002138.1;Gglean002139.1;Gglean002140.1;Gglean002171.1;Gglean002225.1;Gglean002241.1;Gglean002296.1;Gglean002327.1;Gglean002334.1;Gglean002371.1;Gglean002…	K03262+K14307+K03260+K03245+K07936+K03239+K03538+K14308+K14299+K14299+K03238+K14312+K03259+K14327+K13171+K03258+K14303+K14303+K14303+K03257+K12883+K13126+K03240+K14300+K03113+K14326+K03754+K03262+K14309+K13171+K03253+K14004+K03254+K03236+K14298+K03243+K12882+K14303+K12812+K12812+K14285+K12878+K03248+K00784+K13151+K00784+K03242+K14310+K14293+K12881+K12881+K12881+K14297+K02516+K14288+K03241+K03252+…
mRNA surveillance pathway	ko03015	52	Gglean000383.1;Gglean001527.1;Gglean001528.1;Gglean001620.1;Gglean002006.1;Gglean002161.1;Gglean002225.1;Gglean002241.1;Gglean002261.1;Gglean002371.1;Gglean002796.1;Gglean002970.1;Gglean003140.1;Gglean003141.1;Gglean003178.1;Gglean003336.1;Gglean003581.1;Gglean003582.1;Gglean003739.1;Gglean003750.1;Gglean004717.1;Gglean004916.1;Gglean005457.1;Gglean005494.1;Gglean005495.1;Gglean006342.1;Gglean006…	K14403+K14411+K14411+K14327+K13171+K14399+K12883+K13126+K11584+K14326+K13171+K04382+K14411+K14411+K12882+K14408+K12812+K12812+K14285+K14405+K14411+K03265+K12881+K12881+K12881+K12877+K14397+K14294+K14416+K14396+K06100+K12876+K14324+K14402+K04354+K03456+K14404+K13025+K14284+K03267+K14401+K14401+K14376+K14400+K14325+K06965+K13171+K14328+K00565+K12881+K14407+K14328
RNA degradation	ko03018	57	Gglean000298.1;Gglean000532.1;Gglean000533.1;Gglean001293.1;Gglean001430.1;Gglean001468.1;Gglean001774.1;Gglean001912.1;Gglean002003.1;Gglean002189.1;Gglean002191.1;Gglean002241.1;Gglean002591.1;Gglean002753.1;Gglean002775.1;Gglean002863.1;Gglean003284.1;Gglean003610.1;Gglean003921.1;Gglean003922.1;Gglean003969.1;Gglean004026.1;Gglean004186.1;Gglean004264.1;Gglean004265.1;Gglean004273.1;Gglean004…	K12600+K12618+K12618+K12624+K12613+K07573+K12598+K11600+K12623+K03514+K03514+K13126+K12625+K12627+K12590+K12614+K12580+K12600+K12599+K12599+K01689+K12585+K12592+K01689+K01689+K03514+K12584+K04043+K12626+K12572+K10643+K10643+K12598+K12571+K12609+K12609+K12589+K03678+K04077+K12617+K03679+K12606+K12581+K12597+K12608+K12620+K12619+K12622+K12591+K12605+K12605+K03681+K12602+K12604+K12586+K12603+K04043
RNA polymerase	ko03020	32	Gglean000164.1;Gglean000416.1;Gglean001955.1;Gglean002037.1;Gglean002477.1;Gglean002664.1;Gglean002665.1;Gglean002948.1;Gglean003526.1;Gglean004000.1;Gglean004109.1;Gglean004782.1;Gglean004817.1;Gglean004818.1;Gglean005198.1;Gglean005451.1;Gglean005531.1;Gglean006802.1;Gglean007124.1;Gglean007253.1;Gglean007401.1;Gglean007457.1;Gglean007755.1;Gglean007797.1;Gglean007897.1;Gglean008336.1;Gglean009…	K03011+K03006+K03017+K03027+K03000+K03006+K03006+K03013+K14721+K03014+K03010+K03021+K03005+K03005+K03007+K03008+K03024+K03026+K03022+K03006+K03002+K02999+K03016+K03025+K14721+K03018+K03019+K03012+K03015+K03023+K03004+K03025
Basal transcription factors	ko03022	29	Gglean000438.1;Gglean000583.1;Gglean000634.1;Gglean001395.1;Gglean002245.1;Gglean003079.1;Gglean003498.1;Gglean003810.1;Gglean003876.1;Gglean004223.1;Gglean004332.1;Gglean004407.1;Gglean004799.1;Gglean004883.1;Gglean005101.1;Gglean005943.1;Gglean006554.1;Gglean006801.1;Gglean007517.1;Gglean007732.1;Gglean007741.1;Gglean007743.1;Gglean008187.1;Gglean008612.1;Gglean008991.1;Gglean009600.1;Gglean010…	K03143+K10844+K10842+K03130+K03127+K10843+K03131+K03139+K03125+K03128+K03122+K03123+K03137+K03120+K03136+K03139+K03133+K03134+K02202+K03144+K14535+K06634+K03132+K03138+K03135+K03124+K03142+K03141+K03126
DNA replication	ko03030	44	Gglean000277.1;Gglean000439.1;Gglean000448.1;Gglean000742.1;Gglean000902.1;Gglean000942.1;Gglean000943.1;Gglean001051.1;Gglean001428.1;Gglean001895.1;Gglean002213.1;Gglean002308.1;Gglean002988.1;Gglean003334.1;Gglean003449.1;Gglean003463.1;Gglean003523.1;Gglean003592.1;Gglean003597.1;Gglean003997.1;Gglean005120.1;Gglean005438.1;Gglean005523.1;Gglean005616.1;Gglean005655.1;Gglean005790.1;Gglean005…	K02540+K10744+K10747+K02320+K10756+K10742+K10742+K03505+K10747+K10743+K02210+K02685+K10756+K10754+K02541+K02209+K04799+K03469+K03469+K10755+K10742+K03469+K04799+K02320+K02324+K02540+K02540+K02327+K02327+K07466+K02320+K10742+K10742+K10739+K10739+K02542+K02321+K04802+K02325+K02328+K10755+K04799+K02212+K04802
Spliceosome	ko03040	113	Gglean000129.1;Gglean000177.1;Gglean000220.1;Gglean000430.1;Gglean000431.1;Gglean000630.1;Gglean000813.1;Gglean000894.1;Gglean001293.1;Gglean001325.1;Gglean001500.1;Gglean001893.1;Gglean001908.1;Gglean001909.1;Gglean002003.1;Gglean002064.1;Gglean002067.1;Gglean002225.1;Gglean002227.1;Gglean002300.1;Gglean002365.1;Gglean002390.1;Gglean002401.1;Gglean002430.1;Gglean002591.1;Gglean002640.1;Gglean002…	K12836+K12819+K12848+K12842+K12842+K12867+K12830+K12834+K12624+K12839+K12826+K11984+K12823+K12823+K12623+K11093+K12817+K12883+K12846+K12858+K12733+K12829+K12871+K12856+K12625+K12815+K12627+K12882+K12897+K10599+K12816+K11092+K12855+K12855+K11096+K11092+K11097+K12812+K12812+K12818+K12847+K12832+K12852+K12878+K12869+K12843+K12856+K12626+K12831+K12831+K12840+K12856+K12861+K12856+K12856+K12856+K12881+…
Proteasome	ko03050	38	Gglean000635.1;Gglean000884.1;Gglean001092.1;Gglean001290.1;Gglean002338.1;Gglean002388.1;Gglean003224.1;Gglean003227.1;Gglean003380.1;Gglean003601.1;Gglean003837.1;Gglean004260.1;Gglean004758.1;Gglean005356.1;Gglean005357.1;Gglean005358.1;Gglean005363.1;Gglean005587.1;Gglean005647.1;Gglean006045.1;Gglean006075.1;Gglean006251.1;Gglean006258.1;Gglean008044.1;Gglean008339.1;Gglean008904.1;Gglean009…	K02731+K03064+K03028+K03032+K03063+K03038+K02726+K02725+K03036+K03037+K02729+K06698+K03039+K06699+K06699+K06699+K06699+K03033+K03066+K03062+K10881+K02739+K02736+K02737+K02730+K02734+K03066+K02732+K03065+K02727+K02738+K03030+K03031+K03061+K03061+K02728+K03029+K02735
Protein export	ko03060	22	Gglean000628.1;Gglean001543.1;Gglean001945.1;Gglean002320.1;Gglean002449.1;Gglean002450.1;Gglean002585.1;Gglean002625.1;Gglean002767.1;Gglean003957.1;Gglean004346.1;Gglean004775.1;Gglean004790.1;Gglean005524.1;Gglean005666.1;Gglean006231.1;Gglean007931.1;Gglean008055.1;Gglean010243.1;Gglean012015.1;Gglean012037.1;Gglean012121.1;	K13431+K07342+K03108+K03106+K09490+K09490+K10956+K03107+K12275+K03104+K12948+K03109+K09490+K12947+K09481+K12946+K03217+K12272+K09648+K10956+K13280+K09540
Base excision repair	ko03410	24	Gglean000391.1;Gglean000448.1;Gglean001051.1;Gglean001118.1;Gglean001428.1;Gglean002553.1;Gglean002954.1;Gglean003523.1;Gglean003584.1;Gglean003585.1;Gglean003598.1;Gglean004959.1;Gglean005523.1;Gglean005655.1;Gglean006758.1;Gglean006759.1;Gglean008009.1;Gglean008139.1;Gglean009404.1;Gglean009417.1;Gglean010272.1;Gglean011023.1;Gglean011355.1;Gglean012418.1;	K01247+K10747+K03505+K03575+K10747+K10798+K03648+K04799+K10563+K10563+K10771+K10773+K04799+K02324+K02327+K02327+K10771+K03660+K10772+K04802+K02325+K02328+K04799+K04802
Nucleotide excision repair	ko03420	37	Gglean000438.1;Gglean000448.1;Gglean000583.1;Gglean000634.1;Gglean000902.1;Gglean001051.1;Gglean001428.1;Gglean002988.1;Gglean003079.1;Gglean003334.1;Gglean003369.1;Gglean003997.1;Gglean005278.1;Gglean005279.1;Gglean005655.1;Gglean006052.1;Gglean006758.1;Gglean006759.1;Gglean006845.1;Gglean007517.1;Gglean007716.1;Gglean007732.1;Gglean007743.1;Gglean008018.1;Gglean008021.1;Gglean008715.1;Gglean009…	K03143+K10747+K10844+K10842+K10756+K03505+K10747+K10756+K10843+K10754+K10849+K10755+K10847+K10847+K02324+K10846+K02327+K02327+K07466+K02202+K03657+K03144+K06634+K10739+K10739+K10610+K10609+K10838+K04802+K02325+K10848+K03142+K02328+K10755+K10839+K03141+K04802
Mismatch repair	ko03430	23	Gglean000448.1;Gglean000743.1;Gglean000902.1;Gglean001051.1;Gglean001089.1;Gglean001428.1;Gglean002728.1;Gglean002988.1;Gglean003334.1;Gglean003997.1;Gglean005041.1;Gglean006758.1;Gglean006759.1;Gglean006845.1;Gglean007251.1;Gglean007716.1;Gglean008018.1;Gglean008021.1;Gglean008235.1;Gglean009417.1;Gglean011023.1;Gglean011074.1;Gglean012418.1;	K10747+K08735+K10756+K03505+K08734+K10747+K08737+K10756+K10754+K10755+K08736+K02327+K02327+K07466+K10858+K03657+K10739+K10739+K08739+K04802+K02328+K10755+K04802
Homologous recombination	ko03440	19	Gglean000284.1;Gglean001051.1;Gglean001384.1;Gglean001485.1;Gglean004173.1;Gglean006075.1;Gglean006758.1;Gglean006759.1;Gglean006845.1;Gglean008015.1;Gglean008018.1;Gglean008021.1;Gglean008925.1;Gglean009801.1;Gglean011023.1;Gglean011097.1;Gglean011133.1;Gglean011364.1;Gglean011735.1;	K10877+K03505+K04482+K10879+K08775+K10881+K02327+K02327+K07466+K10875+K10739+K10739+K10865+K10866+K02328+K10958+K10901+K10873+K03165
Non-homologous end-joining	ko03450	8	Gglean002626.1;Gglean003523.1;Gglean005523.1;Gglean006679.1;Gglean007670.1;Gglean008925.1;Gglean009801.1;Gglean011355.1;	K10885+K04799+K04799+K10777+K10884+K10865+K10866+K04799
MAPK signaling pathway - yeast	ko04011	38	Gglean000175.1;Gglean000223.1;Gglean000836.1;Gglean001518.1;Gglean001587.1;Gglean001593.1;Gglean001594.1;Gglean002053.1;Gglean002152.1;Gglean002153.1;Gglean003213.1;Gglean003545.1;Gglean003975.1;Gglean004750.1;Gglean004768.1;Gglean004913.1;Gglean005314.1;Gglean005315.1;Gglean005316.1;Gglean006566.1;Gglean007056.1;Gglean007860.1;Gglean008170.1;Gglean008823.1;Gglean009205.1;Gglean009261.1;Gglean010…	K08294+K11236+K04409+K11229+K04627+K04627+K04627+K04464+K07973+K07973+K11237+K11230+K11246+K11215+K04627+K04393+K04627+K04627+K04627+K11233+K09291+K11240+K11228+K02677+K11227+K11232+K11244+K11238+K11238+K01759+K01759+K04627+K04627+K04627+K04627+K04627+K04441+K11245
Phosphatidylinositol signaling system	ko04070	12	Gglean001168.1;Gglean002303.1;Gglean002304.1;Gglean003840.1;Gglean003912.1;Gglean008030.1;Gglean008823.1;Gglean010026.1;Gglean010543.1;Gglean011480.1;Gglean011726.1;Gglean011942.1;	K01099+K00999+K00888+K01092+K00921+K00888+K02677+K00889+K02183+K00914+K00981+K01116
Cell cycle - yeast	ko04111	83	Gglean000130.1;Gglean000216.1;Gglean000217.1;Gglean000232.1;Gglean000234.1;Gglean000267.1;Gglean000277.1;Gglean000524.1;Gglean000525.1;Gglean000770.1;Gglean000806.1;Gglean000935.1;Gglean000936.1;Gglean000988.1;Gglean000990.1;Gglean001198.1;Gglean001392.1;Gglean001457.1;Gglean001782.1;Gglean001882.1;Gglean002068.1;Gglean002213.1;Gglean002366.1;Gglean002434.1;Gglean002465.1;Gglean002722.1;Gglean002…	K03355+K06669+K06669+K02213+K02309+K03348+K02540+K03353+K03353+K02365+K02220+K06666+K06666+K06666+K06666+K06671+K02537+K03351+K02607+K02178+K03357+K02210+K03361+K03364+K06662+K06666+K04382+K06639+K02541+K02209+K06675+K03361+K03361+K02830+K02604+K02307+K02180+K06678+K06678+K06636+K06662+K02540+K02540+K06674+K02516+K04563+K06674+K02603+K06678+K03347+K06662+K06674+K04354+K03456+K03352+K06628+K02179+…
Meiosis - yeast	ko04113	59	Gglean000021.1;Gglean000130.1;Gglean000216.1;Gglean000217.1;Gglean000232.1;Gglean000234.1;Gglean000267.1;Gglean000277.1;Gglean000524.1;Gglean000525.1;Gglean000770.1;Gglean001198.1;Gglean001392.1;Gglean001432.1;Gglean001457.1;Gglean001782.1;Gglean001882.1;Gglean001973.1;Gglean002068.1;Gglean002213.1;Gglean002261.1;Gglean002465.1;Gglean002868.1;Gglean002970.1;Gglean003210.1;Gglean003449.1;Gglean003…	K04345+K03355+K06669+K06669+K02213+K02309+K03348+K02540+K03353+K03353+K02365+K06671+K02537+K12765+K03351+K02607+K02178+K04345+K03357+K02210+K11584+K06662+K06269+K04382+K06639+K02541+K02209+K08139+K12761+K10872+K08139+K08139+K01768+K02830+K02604+K06636+K06662+K02540+K02540+K04563+K08139+K02603+K06662+K03456+K03352+K06628+K02542+K03363+K03363+K03114+K02606+K03349+K02214+K12767+K02216+K03350+K02605+…
Ubiquitin mediated proteolysis	ko04120	62	Gglean000130.1;Gglean000267.1;Gglean000310.1;Gglean000465.1;Gglean000524.1;Gglean000525.1;Gglean000694.1;Gglean000893.1;Gglean000927.1;Gglean001267.1;Gglean001407.1;Gglean001457.1;Gglean001471.1;Gglean002042.1;Gglean002068.1;Gglean002366.1;Gglean002434.1;Gglean002644.1;Gglean003441.1;Gglean003691.1;Gglean004735.1;Gglean004745.1;Gglean004762.1;Gglean004763.1;Gglean005375.1;Gglean005537.1;Gglean005…	K03355+K03348+K10601+K10592+K03353+K03353+K03362+K10590+K06689+K10579+K04706+K03351+K10598+K10601+K03357+K03361+K03364+K10688+K10599+K10586+K10575+K10583+K03361+K03361+K10581+K06689+K03872+K10580+K03869+K04649+K10582+K04649+K03347+K04554+K03352+K10686+K03094+K10577+K03363+K03360+K03360+K10576+K10610+K03363+K10609+K10684+K10597+K03349+K03360+K03178+K10685+K10259+K10578+K03350+K06688+K10591+K10573+…
Sulfur relay system	ko04122	12	Gglean000709.1;Gglean001410.1;Gglean001913.1;Gglean002095.1;Gglean002219.1;Gglean002375.1;Gglean003264.1;Gglean003885.1;Gglean003886.1;Gglean005294.1;Gglean006940.1;Gglean012194.1;	K12161+K03635+K11996+K14169+K04487+K00566+K14168+K03639+K03639+K01011+K04487+K14171
SNARE interactions in vesicular transport	ko04130	20	Gglean000460.1;Gglean000840.1;Gglean001450.1;Gglean001506.1;Gglean002269.1;Gglean002284.1;Gglean002582.1;Gglean004241.1;Gglean005346.1;Gglean005582.1;Gglean005589.1;Gglean005687.1;Gglean005714.1;Gglean007773.1;Gglean008654.1;Gglean009358.1;Gglean010520.1;Gglean010687.1;Gglean011986.1;Gglean012156.1;	K08489+K08504+K08508+K08490+K08486+K08486+K08493+K08495+K08504+K08498+K08497+K08516+K08515+K08502+K08517+K08488+K08513+K08496+K08492+K08501
Regulation of autophagy	ko04140	13	Gglean000160.1;Gglean000184.1;Gglean000185.1;Gglean001184.1;Gglean002511.1;Gglean003397.1;Gglean008423.1;Gglean011100.1;Gglean011409.1;Gglean011480.1;Gglean011659.1;Gglean012013.1;Gglean012293.1;	K08339+K08334+K08334+K08269+K08342+K08332+K08329+K08341+K08333+K00914+K08343+K08337+K08336
Protein processing in endoplasmic reticulum	ko04141	93	Gglean000192.1;Gglean000310.1;Gglean000339.1;Gglean000704.1;Gglean000849.1;Gglean000927.1;Gglean001052.1;Gglean001080.1;Gglean001081.1;Gglean001543.1;Gglean001597.1;Gglean001702.1;Gglean001834.1;Gglean002014.1;Gglean002042.1;Gglean002263.1;Gglean002265.1;Gglean002266.1;Gglean002344.1;Gglean002449.1;Gglean002450.1;Gglean002585.1;Gglean002749.1;Gglean002767.1;Gglean002880.1;Gglean002956.1;Gglean003…	K11863+K10601+K14026+K08852+K13525+K06689+K09584+K07151+K07151+K07342+K04523+K01230+K08860+K05546+K10601+K12669+K10088+K10088+K04079+K09490+K09490+K10956+K14007+K12275+K14007+K09503+K14004+K13525+K08288+K12668+K14015+K01230+K01230+K13993+K13993+K13993+K01230+K13525+K10575+K09490+K09486+K12670+K11718+K14012+K14006+K09584+K01230+K06689+K12667+K09481+K14002+K14003+K10084+K03347+K09584+K13993+K13993+…
Endocytosis	ko04144	53	Gglean000872.1;Gglean001059.1;Gglean001219.1;Gglean001313.1;Gglean001350.1;Gglean001510.1;Gglean002373.1;Gglean002476.1;Gglean002489.1;Gglean002506.1;Gglean002685.1;Gglean002686.1;Gglean002777.1;Gglean003722.1;Gglean004537.1;Gglean004538.1;Gglean004548.1;Gglean004549.1;Gglean004550.1;Gglean004551.1;Gglean004552.1;Gglean004774.1;Gglean004913.1;Gglean005311.1;Gglean005967.1;Gglean005968.1;Gglean005…	K11839+K12184+K11866+K12195+K11824+K12199+K11826+K12486+K12182+K12196+K04646+K04646+K12188+K12471+K04646+K04646+K04646+K04646+K04646+K04646+K04646+K12190+K04393+K07897+K12200+K12200+K12200+K01115+K12189+K04646+K11839+K12492+K12198+K03283+K12183+K12183+K12197+K04646+K04646+K12194+K12471+K12493+K11827+K04705+K00889+K12193+K01528+K01528+K03283+K12191+K10591+K04646+K07941
Phagosome	ko04145	34	Gglean000663.1;Gglean001393.1;Gglean001543.1;Gglean002489.1;Gglean002585.1;Gglean003421.1;Gglean003912.1;Gglean004335.1;Gglean004983.1;Gglean005311.1;Gglean005337.1;Gglean005666.1;Gglean006752.1;Gglean006803.1;Gglean007373.1;Gglean007374.1;Gglean007790.1;Gglean008003.1;Gglean008654.1;Gglean008737.1;Gglean008739.1;Gglean008752.1;Gglean008996.1;Gglean009314.1;Gglean009358.1;Gglean009601.1;Gglean010…	K08008+K08008+K07342+K12182+K10956+K10413+K00921+K03661+K02154+K07897+K02148+K09481+K10415+K02152+K07374+K07374+K04392+K02149+K08517+K02155+K02146+K02147+K07375+K02155+K08488+K10416+K02150+K02144+K02145+K00914+K10416+K08492+K10956+K05692
Peroxisome	ko04146	39	Gglean000034.1;Gglean000402.1;Gglean000501.1;Gglean001007.1;Gglean001328.1;Gglean001342.1;Gglean001416.1;Gglean001645.1;Gglean002552.1;Gglean002573.1;Gglean002583.1;Gglean003257.1;Gglean003420.1;Gglean003450.1;Gglean003579.1;Gglean004034.1;Gglean004075.1;Gglean004314.1;Gglean004631.1;Gglean005284.1;Gglean005374.1;Gglean005842.1;Gglean005843.1;Gglean006247.1;Gglean006753.1;Gglean007184.1;Gglean007…	K01897+K13342+K13342+K13341+K13343+K13352+K13335+K03781+K12663+K13237+K13348+K04564+K13346+K05676+K08764+K01897+K00232+K00624+K13344+K13350+K03781+K04564+K04564+K13338+K00830+K01796+K13354+K03781+K01796+K01640+K01640+K00624+K13336+K13336+K04564+K13339+K06664+K13337+K00031
Natural killer cell mediated cytotoxicity	ko04650	10	Gglean000836.1;Gglean006495.1;Gglean007790.1;Gglean007880.1;Gglean008823.1;Gglean009043.1;Gglean009044.1;Gglean009848.1;Gglean010597.1;Gglean011367.1;	K04409+K06268+K04392+K04371+K02677+K04348+K04348+K04368+K04371+K04371
Circadian rhythm - mammal	ko04710	3	Gglean000694.1;Gglean008153.1;Gglean011995.1;	K03362+K03094+K03362
