# Supplementary material for: De Novo Sequencing of a Sparassis latifolia Genome and Its Associated Comparative Analyses
Source: Can J Infect Dis Med Microbiol. 2018 Feb 25;2018:1857170. doi: 10.1155/2018/1857170 (PMC5845502; doi:10.1155/2018/1857170)
Supplement: Supplementary 3 — Appendix S2: Pfam analysis on the protein domains of S. latifolia. [file 1857170.f3.xlsx]

## Sheet: Pfam annotation
#Gene_ID	Pfam_IDs	Pfam_Description
Gglean000002.1	PF12697.2;PF00561.15	Alpha/beta hydrolase family;; alpha/beta hydrolase fold
Gglean000004.1	PF12697.2	Alpha/beta hydrolase family
Gglean000007.1	PF01873.12	Domain found in IF2B/IF5
Gglean000012.1	PF02373.17	JmjC domain, hydroxylase
Gglean000013.1	PF07738.8	Sad1 / UNC-like C-terminal
Gglean000015.1	PF00250.13;PF01031.15	Fork head domain;; Dynamin central region
Gglean000017.1	PF03188.11	Eukaryotic cytochrome b561
Gglean000018.1	PF01370.16	NAD dependent epimerase/dehydratase family
Gglean000019.1	PF07910.8	Peptidase family C78
Gglean000020.1	PF02900.13	Catalytic LigB subunit of aromatic ring-opening dioxygenase
Gglean000021.1	PF00069.20;PF07714.12	Protein kinase domain;; Protein tyrosine kinase
Gglean000022.1	PF04427.13	Brix domain
Gglean000023.1	PF03060.10;PF00478.20	Nitronate monooxygenase;; IMP dehydrogenase / GMP reductase domain
Gglean000025.1	PF01239.17	Protein prenyltransferase alpha subunit repeat
Gglean000029.1	PF01680.12;PF05690.9	SOR/SNZ family;; Thiazole biosynthesis protein ThiG
Gglean000030.1	PF00134.18	Cyclin, N-terminal domain
Gglean000031.1	PF00026.18	Eukaryotic aspartyl protease
Gglean000032.1	PF09796.4	Ubiquinol-cytochrome-c reductase complex subunit (QCR10)
Gglean000033.1	PF00036.27;PF13499.1;PF13405.1;PF13202.1;PF13833.1	EF hand;; EF-hand domain pair;; EF-hand domain;; EF hand;; EF-hand domain pair
Gglean000034.1	PF00501.23	AMP-binding enzyme
Gglean000036.1	PF10607.4;PF13445.1	CTLH/CRA C-terminal to LisH motif domain;; RING-type zinc-finger
Gglean000037.1	PF08457.5	Sfi1 spindle body protein
Gglean000039.1	PF01165.15	Ribosomal protein S21
Gglean000042.1	PF00134.18	Cyclin, N-terminal domain
Gglean000044.1	PF12348.3;PF13646.1;PF02985.17;PF13513.1	CLASP N terminal;; HEAT repeats;; HEAT repeat;; HEAT-like repeat
Gglean000045.1	PF00172.13	Fungal Zn(2)-Cys(6) binuclear cluster domain
Gglean000051.1	PF10257.4	Retinoic acid induced 16-like protein
Gglean000052.1	PF00106.20;PF08659.5;PF13561.1	short chain dehydrogenase;; KR domain;; Enoyl-(Acyl carrier protein) reductase
Gglean000054.1	PF01553.16	Acyltransferase
Gglean000061.1	PF12589.3;PF08241.7;PF13489.1	Methyltransferase involved in Williams-Beuren syndrome;; Methyltransferase domain;; Methyltransferase domain
Gglean000064.1	PF07690.11;PF06609.8;PF00083.19	Major Facilitator Superfamily;; Fungal trichothecene efflux pump (TRI12);; Sugar (and other) transporter
Gglean000065.1	PF09783.4	Vacuolar import and degradation protein
Gglean000066.1	PF00069.20;PF07714.12	Protein kinase domain;; Protein tyrosine kinase
Gglean000069.1	PF00400.27;PF04003.7;PF11715.3;PF08801.6	WD domain, G-beta repeat;; Dip2/Utp12 Family;; Nucleoporin Nup120/160;; Nup133 N terminal like
Gglean000071.1	PF00647.14;PF02798.15;PF13417.1;PF13410.1;PF00043.20;PF13409.1	Elongation factor 1 gamma, conserved domain;; Glutathione S-transferase, N-terminal domain;; Glutathione S-transferase, N-terminal domain;; Glutathione S-transferase, C-terminal domain;; Glutathione S-transferase, C-terminal domain;; Glutathione S-transferase, N-terminal domain
Gglean000072.1	PF01434.13;PF00004.24;PF07728.9;PF05496.7	Peptidase family M41;; ATPase family associated with various cellular activities (AAA);; AAA domain (dynein-related subfamily);; Holliday junction DNA helicase ruvB N-terminus
Gglean000078.1	PF00583.19	Acetyltransferase (GNAT) family
Gglean000079.1	PF00887.14	Acyl CoA binding protein
Gglean000081.1	PF02656.10	Domain of unknown function (DUF202)
Gglean000084.1	PF13637.1;PF12796.2;PF13857.1;PF00023.25;PF13639.1;PF13606.1	Ankyrin repeats (many copies);; Ankyrin repeats (3 copies);; Ankyrin repeats (many copies);; Ankyrin repeat;; Ring finger domain;; Ankyrin repeat
Gglean000085.1	PF00400.27	WD domain, G-beta repeat
Gglean000088.1	PF09725.4	Folate-sensitive fragile site protein Fra10Ac1
Gglean000089.1	PF01912.13	eIF-6 family
Gglean000090.1	PF01204.13;PF07492.6	Trehalase;; Neutral trehalase Ca2+ binding domain
Gglean000091.1	PF00338.17	Ribosomal protein S10p/S20e
Gglean000092.1	PF00018.23;PF07653.12;PF14604.1	SH3 domain;; Variant SH3 domain;; Variant SH3 domain
Gglean000093.1	PF11700.3	Vacuole effluxer Atg22 like
Gglean000094.1	PF11700.3	Vacuole effluxer Atg22 like
Gglean000095.1	PF00153.22	Mitochondrial carrier protein
Gglean000096.1	PF13634.1	Nucleoporin FG repeat region
Gglean000097.1	PF00022.14	Actin
Gglean000098.1	PF00320.22	GATA zinc finger
Gglean000099.1	PF01425.16	Amidase
Gglean000103.1	PF06687.7	SUR7/PalI family
Gglean000104.1	PF01753.13	MYND finger
Gglean000105.1	PF08528.6	Whi5 like
Gglean000107.1	PF00132.19	Bacterial transferase hexapeptide (six repeats)
Gglean000108.1	PF04082.13	Fungal specific transcription factor domain
Gglean000110.1	PF00096.21;PF13894.1;PF13465.1	Zinc finger, C2H2 type;; C2H2-type zinc finger;; Zinc-finger double domain
Gglean000111.1	PF10313.4	Uncharacterised protein domain (DUF2415)
Gglean000112.1	PF13893.1;PF00076.17	RNA recognition motif. (a.k.a. RRM, RBD, or RNP domain);; RNA recognition motif. (a.k.a. RRM, RBD, or RNP domain)
Gglean000113.1	PF00076.17;PF14259.1;PF13893.1	RNA recognition motif. (a.k.a. RRM, RBD, or RNP domain);; RNA recognition motif (a.k.a. RRM, RBD, or RNP domain);; RNA recognition motif. (a.k.a. RRM, RBD, or RNP domain)
Gglean000116.1	PF00083.19;PF07690.11	Sugar (and other) transporter;; Major Facilitator Superfamily
Gglean000118.1	PF08508.5	Fungal domain of unknown function (DUF1746)
Gglean000121.1	PF01201.17	Ribosomal protein S8e
Gglean000122.1	PF06658.7	Protein of unknown function (DUF1168)
Gglean000123.1	PF13637.1;PF12796.2;PF00023.25	Ankyrin repeats (many copies);; Ankyrin repeats (3 copies);; Ankyrin repeat
Gglean000125.1	PF04099.7	Sybindin-like family
Gglean000126.1	PF00153.22	Mitochondrial carrier protein
Gglean000127.1	PF00172.13	Fungal Zn(2)-Cys(6) binuclear cluster domain
Gglean000129.1	PF00642.19	Zinc finger C-x8-C-x5-C-x3-H type (and similar)
Gglean000130.1	PF00515.23;PF13414.1;PF04049.8;PF13181.1;PF07719.12;PF13424.1;PF13428.1;PF13432.1;PF13176.1;PF14559.1;PF13431.1;PF12895.2;PF13371.1	Tetratricopeptide repeat;; TPR repeat;; Anaphase promoting complex subunit 8 / Cdc23;; Tetratricopeptide repeat;; Tetratricopeptide repeat;; Tetratricopeptide repeat;; Tetratricopeptide repeat;; Tetratricopeptide repeat;; Tetratricopeptide repeat;; Tetratricopeptide repeat;; Tetratricopeptide repeat;; Anaphase-promoting complex, cyclosome, subunit 3;; Tetratricopeptide repeat
Gglean000131.1	PF15249.1	Glioma tumor suppressor candidate region
Gglean000133.1	PF01814.18	Hemerythrin HHE cation binding domain
Gglean000134.1	PF00270.24;PF00271.26;PF08147.7	DEAD/DEAH box helicase;; Helicase conserved C-terminal domain;; DBP10CT (NUC160) domain
Gglean000135.1	PF00579.20	tRNA synthetases class I (W and Y)
Gglean000140.1	PF13847.1;PF12847.2;PF08241.7;PF06325.8;PF13489.1;PF08003.6;PF13659.1;PF05175.9;PF13649.1;PF05185.11;PF02353.15;PF01728.14;PF01209.13	Methyltransferase domain;; Methyltransferase domain;; Methyltransferase domain;; Ribosomal protein L11 methyltransferase (PrmA);; Methyltransferase domain;; Protein of unknown function (DUF1698);; Methyltransferase domain;; Methyltransferase small domain;; Methyltransferase domain;; PRMT5 arginine-N-methyltransferase;; Mycolic acid cyclopropane synthetase;; FtsJ-like methyltransferase;; ubiE/COQ5…
Gglean000141.1	PF08647.6;PF13923.1;PF13920.1;PF00097.20	BRE1 E3 ubiquitin ligase;; Zinc finger, C3HC4 type (RING finger);; Zinc finger, C3HC4 type (RING finger);; Zinc finger, C3HC4 type (RING finger)
Gglean000142.1	PF08172.7	CASP C terminal
Gglean000143.1	PF03208.14	PRA1 family protein
Gglean000144.1	PF13659.1;PF13847.1;PF12847.2;PF05175.9	Methyltransferase domain;; Methyltransferase domain;; Methyltransferase domain;; Methyltransferase small domain
Gglean000145.1	PF12937.2	F-box-like
Gglean000147.1	PF01156.14	Inosine-uridine preferring nucleoside hydrolase
Gglean000150.1	PF01869.15	BadF/BadG/BcrA/BcrD ATPase family
Gglean000151.1	PF12937.2	F-box-like
Gglean000153.1	PF00221.14	Aromatic amino acid lyase
Gglean000154.1	PF01266.19;PF01593.19;PF04820.9;PF13450.1	FAD dependent oxidoreductase;; Flavin containing amine oxidoreductase;; Tryptophan halogenase;; NAD(P)-binding Rossmann-like domain
Gglean000155.1	PF12697.2;PF00561.15	Alpha/beta hydrolase family;; alpha/beta hydrolase fold
Gglean000156.1	PF01425.16	Amidase
Gglean000157.1	PF03650.8	Uncharacterised protein family (UPF0041)
Gglean000158.1	PF13242.1;PF13344.1	HAD-hyrolase-like;; Haloacid dehalogenase-like hydrolase
Gglean000159.1	PF06963.7	Ferroportin1 (FPN1)
Gglean000160.1	PF04106.7	Autophagy protein Apg5
Gglean000161.1	PF02229.11	Transcriptional Coactivator p15 (PC4)
Gglean000162.1	PF03051.10;PF00112.18	Peptidase C1-like family;; Papain family cysteine protease
Gglean000164.1	PF01000.21;PF01193.19	RNA polymerase Rpb3/RpoA insert domain;; RNA polymerase Rpb3/Rpb11 dimerisation domain
Gglean000166.1	PF01490.13	Transmembrane amino acid transporter protein
Gglean000169.1	PF00704.23	Glycosyl hydrolases family 18
Gglean000170.1	PF00046.24;PF05920.6	Homeobox domain;; Homeobox KN domain
Gglean000171.1	PF00005.22;PF13304.1;PF00385.19;PF13207.1;PF08477.8;PF13555.1;PF13401.1;PF13476.1;PF01926.18;PF01935.12;PF05729.7;PF03193.11	ABC transporter;; AAA domain;; Chromo (CHRromatin Organisation MOdifier) domain;; AAA domain;; Miro-like protein;; P-loop containing region of AAA domain;; AAA domain;; AAA domain;; 50S ribosome-binding GTPase;; Domain of unknown function DUF87;; NACHT domain;; Protein of unknown function, DUF258
Gglean000173.1	PF00096.21;PF13894.1;PF13465.1	Zinc finger, C2H2 type;; C2H2-type zinc finger;; Zinc-finger double domain
Gglean000175.1	PF00069.20;PF07714.12;PF14531.1	Protein kinase domain;; Protein tyrosine kinase;; Kinase-like
Gglean000176.1	PF01112.13	Asparaginase
Gglean000177.1	PF11708.3	Pre-mRNA splicing Prp18-interacting factor
Gglean000181.1	PF00013.24;PF13014.1;PF07650.12;PF14611.1	KH domain;; KH domain;; KH domain;; Mitochondrial inner-membrane-bound regulator
Gglean000182.1	PF07859.8	alpha/beta hydrolase fold
Gglean000183.1	PF00096.21	Zinc finger, C2H2 type
Gglean000184.1	PF04111.7	Autophagy protein Apg6
Gglean000185.1	PF04111.7	Autophagy protein Apg6
Gglean000186.1	PF03074.11	Glutamate-cysteine ligase
Gglean000187.1	PF04892.7	VanZ like family
Gglean000189.1	PF10497.4	Zinc-finger domain of monoamine-oxidase A repressor R1
Gglean000191.1	PF01243.15	Pyridoxamine 5'-phosphate oxidase
Gglean000192.1	PF02099.12	Josephin
Gglean000194.1	PF00566.13	Rab-GTPase-TBC domain
Gglean000195.1	PF01833.19;PF00023.25;PF12796.2;PF13857.1;PF13637.1;PF13606.1	IPT/TIG domain;; Ankyrin repeat;; Ankyrin repeats (3 copies);; Ankyrin repeats (many copies);; Ankyrin repeats (many copies);; Ankyrin repeat
Gglean000197.1	PF00766.14;PF01012.16	Electron transfer flavoprotein FAD-binding domain;; Electron transfer flavoprotein domain
Gglean000199.1	PF07690.11	Major Facilitator Superfamily
Gglean001804.1	PF09811.4	Essential protein Yae1, N terminal
Gglean001806.1	PF01244.16	Membrane dipeptidase (Peptidase family M19)
Gglean001807.1	PF01250.12	Ribosomal protein S6
Gglean001808.1	PF05970.9;PF13604.1;PF09848.4	PIF1-like helicase;; AAA domain;; Uncharacterized conserved protein (DUF2075)
Gglean001814.1	PF13920.1;PF13923.1;PF01363.16;PF00097.20	Zinc finger, C3HC4 type (RING finger);; Zinc finger, C3HC4 type (RING finger);; FYVE zinc finger;; Zinc finger, C3HC4 type (RING finger)
Gglean001817.1	PF00400.27	WD domain, G-beta repeat
Gglean001823.1	PF00075.19	RNase H
Gglean001829.1	PF13621.1;PF02373.17	Cupin-like domain;; JmjC domain, hydroxylase
Gglean001834.1	PF00069.20;PF07714.12;PF12745.2;PF13393.1;PF05773.17	Protein kinase domain;; Protein tyrosine kinase;; Anticodon binding domain of tRNAs;; Histidyl-tRNA synthetase;; RWD domain
Gglean001835.1	PF10294.4	Putative methyltransferase
Gglean001836.1	PF01248.21	Ribosomal protein L7Ae/L30e/S12e/Gadd45 family
Gglean001837.1	PF04434.12	SWIM zinc finger
Gglean001840.1	PF04140.9;PF04191.8;PF01222.12	Isoprenylcysteine carboxyl methyltransferase (ICMT) family;; Phospholipid methyltransferase;; Ergosterol biosynthesis ERG4/ERG24 family
Gglean001843.1	PF03061.17	Thioesterase superfamily
Gglean001844.1	PF00078.22	Reverse transcriptase (RNA-dependent DNA polymerase)
Gglean001845.1	PF12550.3	Transcriptional activator of glycolytic enzymes
Gglean001846.1	PF00012.15;PF10712.4	Hsp70 protein;; NAD-specific glutamate dehydrogenase
Gglean001847.1	PF13641.1;PF00535.21;PF13506.1	Glycosyltransferase like family 2;; Glycosyl transferase family 2;; Glycosyl transferase family 21
Gglean001848.1	PF05970.9	PIF1-like helicase
Gglean001849.1	PF00152.15	tRNA synthetases class II (D, K and N)
Gglean001854.1	PF00122.15;PF00690.21	E1-E2 ATPase;; Cation transporter/ATPase, N-terminus
Gglean001855.1	PF10186.4	UV radiation resistance protein and autophagy-related subunit 14
Gglean001858.1	PF08240.7	Alcohol dehydrogenase GroES-like domain
Gglean001862.1	PF08240.7	Alcohol dehydrogenase GroES-like domain
Gglean001865.1	PF08403.5	Amino acid permease N-terminal
Gglean001868.1	PF02992.9	Transposase family tnp2
Gglean001873.1	PF00128.19	Alpha amylase, catalytic domain
Gglean001874.1	PF00400.27;PF13360.1	WD domain, G-beta repeat;; PQQ-like domain
Gglean001876.1	PF03169.10	OPT oligopeptide transporter protein
Gglean001877.1	PF03169.10	OPT oligopeptide transporter protein
Gglean001879.1	PF13087.1;PF13086.1;PF13604.1;PF13245.1;PF00270.24	AAA domain;; AAA domain;; AAA domain;; Part of AAA domain;; DEAD/DEAH box helicase
Gglean001880.1	PF08585.7	Domain of unknown function (DUF1767)
Gglean001881.1	PF04442.9	Cytochrome c oxidase assembly protein CtaG/Cox11
Gglean001882.1	PF08311.7;PF00069.20;PF07714.12;PF08171.6	Mad3/BUB1 homology region 1;; Protein kinase domain;; Protein tyrosine kinase;; Mad3/BUB1 homology region 2
Gglean001883.1	PF00226.26	DnaJ domain
Gglean001884.1	PF12847.2;PF13847.1;PF08241.7;PF13659.1;PF13649.1	Methyltransferase domain;; Methyltransferase domain;; Methyltransferase domain;; Methyltransferase domain;; Methyltransferase domain
Gglean001885.1	PF03062.14	MBOAT, membrane-bound O-acyltransferase family
Gglean001886.1	PF01494.14;PF01266.19;PF13450.1;PF01593.19	FAD binding domain;; FAD dependent oxidoreductase;; NAD(P)-binding Rossmann-like domain;; Flavin containing amine oxidoreductase
Gglean001890.1	PF08622.5	Svf1-like
Gglean001892.1	PF01699.19	Sodium/calcium exchanger protein
Gglean001893.1	PF03343.8	SART-1 family
Gglean001894.1	PF01494.14;PF01266.19;PF13450.1;PF00890.19;PF00070.22;PF07992.9;PF05834.7;PF01946.12;PF01593.19;PF04820.9	FAD binding domain;; FAD dependent oxidoreductase;; NAD(P)-binding Rossmann-like domain;; FAD binding domain;; Pyridine nucleotide-disulphide oxidoreductase;; Pyridine nucleotide-disulphide oxidoreductase;; Lycopene cyclase protein;; Thi4 family;; Flavin containing amine oxidoreductase;; Tryptophan halogenase
Gglean001895.1	PF01351.13	Ribonuclease HII
Gglean001896.1	PF00339.24	Arrestin (or S-antigen), N-terminal domain
Gglean001897.1	PF03069.10	Acetamidase/Formamidase family
Gglean001899.1	PF12697.2;PF12695.2;PF12146.3	Alpha/beta hydrolase family;; Alpha/beta hydrolase family;; Putative lysophospholipase
Gglean001900.1	PF00067.17	Cytochrome P450
Gglean001901.1	PF12738.2;PF00533.21	twin BRCT domain;; BRCA1 C Terminus (BRCT) domain
Gglean001902.1	PF00171.17	Aldehyde dehydrogenase family
Gglean001906.1	PF00789.15	UBX domain
Gglean001907.1	PF00071.17;PF08477.8	Ras family;; Miro-like protein
Gglean001908.1	PF00270.24;PF00271.26;PF04851.10	DEAD/DEAH box helicase;; Helicase conserved C-terminal domain;; Type III restriction enzyme, res subunit
Gglean001910.1	PF12697.2	Alpha/beta hydrolase family
Gglean001911.1	PF00628.24	PHD-finger
Gglean001912.1	PF01138.16	3' exoribonuclease family, domain 1
Gglean001913.1	PF00899.16;PF05237.8;PF00581.15	ThiF family;; MoeZ/MoeB domain;; Rhodanese-like domain
Gglean001914.1	PF00226.26;PF12171.3;PF12874.2	DnaJ domain;; Zinc-finger double-stranded RNA-binding;; Zinc-finger of C2H2 type
Gglean001915.1	PF02297.12	Cytochrome oxidase c subunit VIb
Gglean001916.1	PF04045.9	Arp2/3 complex, 34 kD subunit p34-Arc
Gglean001917.1	PF01040.13	UbiA prenyltransferase family
Gglean001922.1	PF03619.11	Organic solute transporter Ostalpha
Gglean001923.1	PF00218.16;PF00697.17;PF00117.23;PF07722.8	Indole-3-glycerol phosphate synthase;; N-(5'phosphoribosyl)anthranilate (PRA) isomerase;; Glutamine amidotransferase class-I;; Peptidase C26
Gglean001924.1	PF07690.11	Major Facilitator Superfamily
Gglean001925.1	PF08518.6	Spa2 homology domain (SHD) of GIT
Gglean001926.1	PF00933.16;PF01915.17;PF14310.1	Glycosyl hydrolase family 3 N terminal domain;; Glycosyl hydrolase family 3 C-terminal domain;; Fibronectin type III-like domain
Gglean001927.1	PF02985.17;PF12755.2;PF13646.1;PF13513.1	HEAT repeat;; Vacuolar 14 Fab1-binding region;; HEAT repeats;; HEAT-like repeat
Gglean001928.1	PF00891.13	O-methyltransferase
Gglean001930.1	PF00109.21	Beta-ketoacyl synthase, N-terminal domain
Gglean001931.1	PF00698.16;PF00109.21;PF02801.17;PF14765.1;PF00975.15;PF00550.20;PF12697.2	Acyl transferase domain;; Beta-ketoacyl synthase, N-terminal domain;; Beta-ketoacyl synthase, C-terminal domain;; Polyketide synthase dehydratase;; Thioesterase domain;; Phosphopantetheine attachment site;; Alpha/beta hydrolase family
Gglean001932.1	PF00266.14	Aminotransferase class-V
Gglean001933.1	PF12051.3	Protein of unknown function (DUF3533)
Gglean001934.1	PF00620.22	RhoGAP domain
Gglean001935.1	PF05730.6	CFEM domain
Gglean001936.1	PF05730.6	CFEM domain
Gglean001937.1	PF00503.15;PF00025.16	G-protein alpha subunit;; ADP-ribosylation factor family
Gglean001938.1	PF07690.11	Major Facilitator Superfamily
Gglean001939.1	PF01494.14	FAD binding domain
Gglean001940.1	PF01494.14	FAD binding domain
Gglean001942.1	PF02666.10	Phosphatidylserine decarboxylase
Gglean001943.1	PF02666.10	Phosphatidylserine decarboxylase
Gglean001944.1	PF07539.7	Down-regulated in metastasis
Gglean001945.1	PF08492.7	SRP72 RNA-binding domain
Gglean001946.1	PF00328.17	Histidine phosphatase superfamily (branch 2)
Gglean001951.1	PF01285.13	TEA/ATTS domain family
Gglean001955.1	PF01096.13;PF02150.11	Transcription factor S-II (TFIIS);; RNA polymerases M/15 Kd subunit
Gglean001957.1	PF00664.18;PF00005.22;PF07673.9	ABC transporter transmembrane region;; ABC transporter;; Protein of unknown function (DUF1602)
Gglean001959.1	PF13147.1;PF01979.15;PF07969.6;PF13594.1	Amidohydrolase;; Amidohydrolase family;; Amidohydrolase family;; Amidohydrolase
Gglean001960.1	PF01467.21	Cytidylyltransferase
Gglean001962.1	PF14792.1;PF14716.1;PF10391.4	DNA polymerase beta palm;; Helix-hairpin-helix domain;; Fingers domain of DNA polymerase lambda
Gglean001964.1	PF07690.11	Major Facilitator Superfamily
Gglean001966.1	PF12697.2;PF00561.15;PF12695.2	Alpha/beta hydrolase family;; alpha/beta hydrolase fold;; Alpha/beta hydrolase family
Gglean001969.1	PF00082.17;PF05922.11	Subtilase family;; Peptidase inhibitor I9
Gglean001970.1	PF00708.13	Acylphosphatase
Gglean001971.1	PF14880.1	Cytochrome oxidase c assembly
Gglean001972.1	PF00176.18;PF00271.26;PF04851.10;PF00270.24	SNF2 family N-terminal domain;; Helicase conserved C-terminal domain;; Type III restriction enzyme, res subunit;; DEAD/DEAH box helicase
Gglean001973.1	PF00069.20;PF07714.12	Protein kinase domain;; Protein tyrosine kinase
Gglean001976.1	PF00590.15	Tetrapyrrole (Corrin/Porphyrin) Methylases
Gglean001977.1	PF00152.15;PF01336.20	tRNA synthetases class II (D, K and N);; OB-fold nucleic acid binding domain
Gglean001978.1	PF04777.8	Erv1 / Alr family
Gglean001979.1	PF07994.7;PF01658.12	Myo-inositol-1-phosphate synthase;; Myo-inositol-1-phosphate synthase
Gglean001980.1	PF10287.4;PF10290.4	Putative TOS1-like glycosyl hydrolase (DUF2401);; Glycine-rich protein domain (DUF2403)
Gglean001983.1	PF00617.14;PF00169.24;PF00620.22	RasGEF domain;; PH domain;; RhoGAP domain
Gglean001985.1	PF00005.22;PF13304.1	ABC transporter;; AAA domain
Gglean001988.1	PF00133.17;PF08264.8	tRNA synthetases class I (I, L, M and V);; Anticodon-binding domain of tRNA
Gglean001991.1	PF13405.1;PF00036.27;PF13499.1;PF13202.1;PF13833.1	EF-hand domain;; EF hand;; EF-hand domain pair;; EF hand;; EF-hand domain pair
Gglean001995.1	PF00106.20	short chain dehydrogenase
Gglean001996.1	PF00646.28	F-box domain
Gglean001997.1	PF12706.2;PF13483.1	Beta-lactamase superfamily domain;; Beta-lactamase superfamily domain
Gglean001999.1	PF03031.13	NLI interacting factor-like phosphatase
Gglean002000.1	PF03659.9	Glycosyl hydrolase family 71
Gglean002001.1	PF03659.9	Glycosyl hydrolase family 71
Gglean002002.1	PF12937.2	F-box-like
Gglean002003.1	PF01423.17	LSM domain
Gglean002007.1	PF00153.22	Mitochondrial carrier protein
Gglean002008.1	PF02040.10	Arsenical pump membrane protein
Gglean002009.1	PF00916.15;PF13792.1;PF01740.16	Sulfate transporter family;; Sulfate transporter N-terminal domain with GLY motif;; STAS domain
Gglean002012.1	PF04199.8	Putative cyclase
Gglean002013.1	PF04199.8	Putative cyclase
Gglean002014.1	PF01055.21;PF13802.1	Glycosyl hydrolases family 31;; Galactose mutarotase-like
Gglean002017.1	PF00441.19;PF02770.14;PF02771.11;PF08028.6	Acyl-CoA dehydrogenase, C-terminal domain;; Acyl-CoA dehydrogenase, middle domain;; Acyl-CoA dehydrogenase, N-terminal domain;; Acyl-CoA dehydrogenase, C-terminal domain
Gglean002018.1	PF00170.16;PF07716.10	bZIP transcription factor;; Basic region leucine zipper
Gglean002020.1	PF00656.17	Caspase domain
Gglean002022.1	PF12936.2;PF05178.7	KRI1-like family C-terminal;; KRI1-like family
Gglean002027.1	PF02548.10	Ketopantoate hydroxymethyltransferase
Gglean002029.1	PF04734.8	Neutral/alkaline non-lysosomal ceramidase
Gglean002030.1	PF04696.8	pinin/SDK/memA/ protein conserved region
Gglean002031.1	PF12243.3;PF12350.3	CTD kinase subunit gamma CTK3;; CTD kinase subunit gamma CTK3 C-terminus
Gglean002036.1	PF00628.24	PHD-finger
Gglean002037.1	PF01000.21;PF01193.19	RNA polymerase Rpb3/RpoA insert domain;; RNA polymerase Rpb3/Rpb11 dimerisation domain
Gglean002040.1	PF00249.26;PF13921.1	Myb-like DNA-binding domain;; Myb-like DNA-binding domain
Gglean002041.1	PF00067.17	Cytochrome P450
Gglean002042.1	PF12678.2;PF13639.1;PF13923.1;PF00097.20	RING-H2 zinc finger;; Ring finger domain;; Zinc finger, C3HC4 type (RING finger);; Zinc finger, C3HC4 type (RING finger)
Gglean002043.1	PF00501.23;PF07993.7;PF00550.20	AMP-binding enzyme;; Male sterility protein;; Phosphopantetheine attachment site
Gglean002044.1	PF03069.10	Acetamidase/Formamidase family
Gglean002045.1	PF00135.23;PF07859.8	Carboxylesterase family;; alpha/beta hydrolase fold
Gglean002046.1	PF03109.11	ABC1 family
Gglean002047.1	PF14519.1	Macro-like domain
Gglean002049.1	PF00400.27	WD domain, G-beta repeat
Gglean002050.1	PF00122.15;PF13246.1	E1-E2 ATPase;; Putative hydrolase of sodium-potassium ATPase alpha subunit
Gglean002052.1	PF00248.16	Aldo/keto reductase family
Gglean002053.1	PF00069.20;PF07714.12	Protein kinase domain;; Protein tyrosine kinase
Gglean002054.1	PF13414.1;PF00564.19;PF00515.23;PF07719.12	TPR repeat;; PB1 domain;; Tetratricopeptide repeat;; Tetratricopeptide repeat
Gglean002055.1	PF04083.11;PF00561.15;PF12697.2;PF12695.2;PF03959.8	Partial alpha/beta-hydrolase lipase region;; alpha/beta hydrolase fold;; Alpha/beta hydrolase family;; Alpha/beta hydrolase family;; Serine hydrolase (FSH1)
Gglean002056.1	PF13450.1;PF01266.19;PF01494.14;PF01134.17;PF03486.9;PF07992.9;PF00890.19;PF04820.9	NAD(P)-binding Rossmann-like domain;; FAD dependent oxidoreductase;; FAD binding domain;; Glucose inhibited division protein A;; HI0933-like protein;; Pyridine nucleotide-disulphide oxidoreductase;; FAD binding domain;; Tryptophan halogenase
Gglean002057.1	PF04820.9	Tryptophan halogenase
Gglean002062.1	PF00285.16	Citrate synthase
Gglean002064.1	PF00076.17;PF14259.1;PF12220.3;PF13893.1	RNA recognition motif. (a.k.a. RRM, RBD, or RNP domain);; RNA recognition motif (a.k.a. RRM, RBD, or RNP domain);; U1 small nuclear ribonucleoprotein of 70kDa MW N terminal;; RNA recognition motif. (a.k.a. RRM, RBD, or RNP domain)
Gglean002065.1	PF00046.24	Homeobox domain
Gglean002066.1	PF00076.17;PF14259.1	RNA recognition motif. (a.k.a. RRM, RBD, or RNP domain);; RNA recognition motif (a.k.a. RRM, RBD, or RNP domain)
Gglean002067.1	PF02840.10;PF08799.6	Prp18 domain;; pre-mRNA processing factor 4 (PRP4) like
Gglean002068.1	PF03256.11	Anaphase-promoting complex, subunit 10 (APC10)
Gglean002070.1	PF00160.16	Cyclophilin type peptidyl-prolyl cis-trans isomerase/CLD
Gglean002072.1	PF06071.8;PF01926.18;PF02421.13	Protein of unknown function (DUF933);; 50S ribosome-binding GTPase;; Ferrous iron transport protein B
Gglean002073.1	PF08613.6;PF00134.18	Cyclin;; Cyclin, N-terminal domain
Gglean002076.1	PF04095.11	Nicotinate phosphoribosyltransferase (NAPRTase) family
Gglean002077.1	PF00327.15	Ribosomal protein L30p/L7e
Gglean002079.1	PF00004.24;PF05496.7;PF13207.1;PF13401.1;PF13191.1;PF13671.1;PF07728.9;PF07724.9;PF13173.1;PF06068.8;PF13245.1;PF06414.7;PF01695.12;PF00910.17;PF13521.1;PF13481.1;PF01078.16;PF05729.7;PF07726.6;PF00005.22;PF13238.1;PF06745.8;PF00158.21	ATPase family associated with various cellular activities (AAA);; Holliday junction DNA helicase ruvB N-terminus;; AAA domain;; AAA domain;; AAA ATPase domain;; AAA domain;; AAA domain (dynein-related subfamily);; AAA domain (Cdc48 subfamily);; AAA domain;; TIP49 C-terminus;; Part of AAA domain;; Zeta toxin;; IstB-like ATP binding protein;; RNA helicase;; AAA domain;; AAA domain;; Magnesium chela…
Gglean002081.1	PF07690.11	Major Facilitator Superfamily
Gglean002082.1	PF06682.7	Protein of unknown function (DUF1183)
Gglean002084.1	PF03169.10	OPT oligopeptide transporter protein
Gglean002086.1	PF13414.1;PF00515.23;PF07719.12;PF13432.1;PF14559.1;PF13428.1	TPR repeat;; Tetratricopeptide repeat;; Tetratricopeptide repeat;; Tetratricopeptide repeat;; Tetratricopeptide repeat;; Tetratricopeptide repeat
Gglean002087.1	PF01214.13	Casein kinase II regulatory subunit
Gglean002088.1	PF14681.1;PF00485.13	Uracil phosphoribosyltransferase;; Phosphoribulokinase / Uridine kinase family
Gglean002090.1	PF01215.14	Cytochrome c oxidase subunit Vb
Gglean002091.1	PF01435.13	Peptidase family M48
Gglean002093.1	PF13432.1;PF14559.1;PF13414.1;PF00515.23;PF07719.12;PF13431.1;PF13428.1	Tetratricopeptide repeat;; Tetratricopeptide repeat;; TPR repeat;; Tetratricopeptide repeat;; Tetratricopeptide repeat;; Tetratricopeptide repeat;; Tetratricopeptide repeat
Gglean002094.1	PF02582.9	Uncharacterised ACR, YagE family COG1723
Gglean002095.1	PF10288.4	Protein of unknown function (DUF2392)
Gglean002098.1	PF01127.17	Succinate dehydrogenase/Fumarate reductase transmembrane subunit
Gglean002099.1	PF02854.14;PF02847.12	MIF4G domain;; MA3 domain
Gglean002100.1	PF13087.1;PF13086.1;PF13604.1;PF13245.1	AAA domain;; AAA domain;; AAA domain;; Part of AAA domain
Gglean002101.1	PF06741.8	LsmAD domain
Gglean002102.1	PF00226.26	DnaJ domain
Gglean002103.1	PF00755.15	Choline/Carnitine o-acyltransferase
Gglean002104.1	PF00755.15	Choline/Carnitine o-acyltransferase
Gglean002106.1	PF00621.15;PF15405.1;PF00169.24	RhoGEF domain;; Pleckstrin homology domain;; PH domain
Gglean002107.1	PF00780.17	CNH domain
Gglean002109.1	PF03372.18	Endonuclease/Exonuclease/phosphatase family
Gglean002110.1	PF00083.19;PF07690.11	Sugar (and other) transporter;; Major Facilitator Superfamily
Gglean002113.1	PF15035.1	Ciliary rootlet component, centrosome cohesion
Gglean002122.1	PF10551.4	MULE transposase domain
Gglean002125.1	PF01432.15	Peptidase family M3
Gglean002127.1	PF05920.6	Homeobox KN domain
Gglean002128.1	PF00046.24;PF05920.6	Homeobox domain;; Homeobox KN domain
Gglean002136.1	PF08613.6	Cyclin
Gglean002141.1	PF00067.17	Cytochrome P450
Gglean002144.1	PF08643.5	Fungal family of unknown function (DUF1776)
Gglean002145.1	PF07823.6;PF13563.1	Cyclic phosphodiesterase-like protein;; 2'-5' RNA ligase superfamily
Gglean002146.1	PF00013.24;PF13014.1;PF07650.12	KH domain;; KH domain;; KH domain
Gglean002147.1	PF04427.13	Brix domain
Gglean002148.1	PF01636.18;PF01633.15;PF00069.20	Phosphotransferase enzyme family;; Choline/ethanolamine kinase;; Protein kinase domain
Gglean002150.1	PF14519.1	Macro-like domain
Gglean002152.1	PF00631.17	GGL domain
Gglean002153.1	PF00631.17	GGL domain
Gglean002154.1	PF00710.15;PF00023.25;PF12796.2;PF13637.1;PF13606.1;PF13857.1	Asparaginase;; Ankyrin repeat;; Ankyrin repeats (3 copies);; Ankyrin repeats (many copies);; Ankyrin repeat;; Ankyrin repeats (many copies)
Gglean002157.1	PF00009.22;PF06421.7;PF00679.19;PF03144.20;PF14492.1;PF01926.18;PF00071.17	Elongation factor Tu GTP binding domain;; GTP-binding protein LepA C-terminus;; Elongation factor G C-terminus;; Elongation factor Tu domain 2;; Elongation Factor G, domain II;; 50S ribosome-binding GTPase;; Ras family
Gglean002160.1	PF00004.24;PF05496.7;PF03215.10;PF07728.9	ATPase family associated with various cellular activities (AAA);; Holliday junction DNA helicase ruvB N-terminus;; Rad17 cell cycle checkpoint protein;; AAA domain (dynein-related subfamily)
Gglean002161.1	PF06807.9;PF03205.9	Pre-mRNA cleavage complex II protein Clp1;; Molybdopterin guanine dinucleotide synthesis protein B
Gglean002164.1	PF06602.9	Myotubularin-like phosphatase domain
Gglean002165.1	PF02773.11;PF02772.11;PF00438.15	S-adenosylmethionine synthetase, C-terminal domain;; S-adenosylmethionine synthetase, central domain;; S-adenosylmethionine synthetase, N-terminal domain
Gglean002166.1	PF00501.23;PF13193.1	AMP-binding enzyme;; AMP-binding enzyme C-terminal domain
Gglean002167.1	PF00069.20;PF07714.12	Protein kinase domain;; Protein tyrosine kinase
Gglean002168.1	PF00149.23;PF12850.2	Calcineurin-like phosphoesterase;; Calcineurin-like phosphoesterase superfamily domain
Gglean002169.1	PF00682.14	HMGL-like
Gglean002170.1	PF08502.5;PF00682.14	LeuA allosteric (dimerisation) domain;; HMGL-like
Gglean002171.1	PF00270.24;PF00271.26	DEAD/DEAH box helicase;; Helicase conserved C-terminal domain
Gglean002172.1	PF00782.15	Dual specificity phosphatase, catalytic domain
Gglean002173.1	PF04627.8	Mitochondrial ATP synthase epsilon chain
Gglean002174.1	PF00098.18;PF14392.1;PF13917.1;PF13696.1;PF15288.1	Zinc knuckle;; Zinc knuckle;; Zinc knuckle;; Zinc knuckle;; Zinc knuckle
Gglean002175.1	PF02936.9	Cytochrome c oxidase subunit IV
Gglean002176.1	PF01269.12;PF08704.5	Fibrillarin;; tRNA methyltransferase complex GCD14 subunit
Gglean002177.1	PF02366.13;PF02815.14	Dolichyl-phosphate-mannose-protein mannosyltransferase;; MIR domain
Gglean002180.1	PF04515.7	Plasma-membrane choline transporter
Gglean002183.1	PF00400.27	WD domain, G-beta repeat
Gglean002184.1	PF02065.13	Melibiase
Gglean002185.1	PF00026.18	Eukaryotic aspartyl protease
Gglean002188.1	PF01557.13	Fumarylacetoacetate (FAA) hydrolase family
Gglean002189.1	PF03828.14;PF01909.18	Cid1 family poly A polymerase;; Nucleotidyltransferase domain
Gglean002193.1	PF00657.17	GDSL-like Lipase/Acylhydrolase
Gglean002194.1	PF00172.13	Fungal Zn(2)-Cys(6) binuclear cluster domain
Gglean002196.1	PF04142.10;PF13536.1;PF08449.6;PF03151.11	Nucleotide-sugar transporter;; Multidrug resistance efflux transporter;; UAA transporter family;; Triose-phosphate Transporter family
Gglean002197.1	PF10296.4	Putative integral membrane protein conserved region (DUF2404)
Gglean002198.1	PF01150.12	GDA1/CD39 (nucleoside phosphatase) family
Gglean002200.1	PF04082.13	Fungal specific transcription factor domain
Gglean002201.1	PF02580.11	D-Tyr-tRNA(Tyr) deacylase
Gglean002202.1	PF07992.9;PF00070.22;PF00036.27;PF13499.1;PF13405.1;PF13202.1;PF13833.1;PF13738.1	Pyridine nucleotide-disulphide oxidoreductase;; Pyridine nucleotide-disulphide oxidoreductase;; EF hand;; EF-hand domain pair;; EF-hand domain;; EF hand;; EF-hand domain pair;; Pyridine nucleotide-disulphide oxidoreductase
Gglean002204.1	PF00005.22;PF13304.1;PF12698.2;PF13476.1	ABC transporter;; AAA domain;; ABC-2 family transporter protein;; AAA domain
Gglean002205.1	PF12701.2;PF09532.5	Scd6-like Sm domain;; FDF domain
Gglean002207.1	PF00075.19	RNase H
Gglean002208.1	PF02752.17	Arrestin (or S-antigen), C-terminal domain
Gglean002209.1	PF00676.15	Dehydrogenase E1 component
Gglean002211.1	PF06419.6	Conserved oligomeric complex COG6
Gglean002212.1	PF01910.12	Domain of unknown function DUF77
Gglean002213.1	PF00493.18;PF14551.1;PF07728.9;PF01078.16	MCM2/3/5 family;; MCM N-terminal domain;; AAA domain (dynein-related subfamily);; Magnesium chelatase, subunit ChlI
Gglean002214.1	PF04177.7	TAP42-like family
Gglean002215.1	PF02219.12	Methylenetetrahydrofolate reductase
Gglean002216.1	PF02219.12	Methylenetetrahydrofolate reductase
Gglean002217.1	PF00400.27	WD domain, G-beta repeat
Gglean002218.1	PF08241.7	Methyltransferase domain
Gglean002221.1	PF06884.6	Protein of unknown function (DUF1264)
Gglean002222.1	PF04388.7	Hamartin protein
Gglean002223.1	PF01849.13	NAC domain
Gglean002224.1	PF14748.1;PF03807.12	Pyrroline-5-carboxylate reductase dimerisation;; NADP oxidoreductase coenzyme F420-dependent
Gglean002225.1	PF00076.17;PF14259.1;PF13893.1	RNA recognition motif. (a.k.a. RRM, RBD, or RNP domain);; RNA recognition motif (a.k.a. RRM, RBD, or RNP domain);; RNA recognition motif. (a.k.a. RRM, RBD, or RNP domain)
Gglean002226.1	PF01036.13	Bacteriorhodopsin-like protein
Gglean002227.1	PF08648.7	Protein of unknown function (DUF1777)
Gglean002230.1	PF00566.13	Rab-GTPase-TBC domain
Gglean002231.1	PF11969.3;PF01230.18	Scavenger mRNA decapping enzyme C-term binding;; HIT domain
Gglean002233.1	PF02037.22	SAP domain
Gglean002234.1	PF10231.4	Uncharacterised conserved protein (DUF2315)
Gglean002235.1	PF10253.4	Mitotic checkpoint regulator, MAD2B-interacting
Gglean002237.1	PF00266.14	Aminotransferase class-V
Gglean002239.1	PF05891.7	AdoMet dependent proline di-methyltransferase
Gglean002240.1	PF04144.8	SCAMP family
Gglean002241.1	PF00076.17;PF14259.1;PF13893.1;PF00658.13;PF08777.6	RNA recognition motif. (a.k.a. RRM, RBD, or RNP domain);; RNA recognition motif (a.k.a. RRM, RBD, or RNP domain);; RNA recognition motif. (a.k.a. RRM, RBD, or RNP domain);; Poly-adenylate binding protein, unique domain;; RNA binding motif
Gglean002242.1	PF00400.27	WD domain, G-beta repeat
Gglean002243.1	PF09745.4	Coiled-coil domain-containing protein 55 (DUF2040)
Gglean002244.1	PF14259.1;PF00076.17;PF13893.1	RNA recognition motif (a.k.a. RRM, RBD, or RNP domain);; RNA recognition motif. (a.k.a. RRM, RBD, or RNP domain);; RNA recognition motif. (a.k.a. RRM, RBD, or RNP domain)
Gglean002245.1	PF02269.11	Transcription initiation factor IID, 18kD subunit
Gglean002246.1	PF00083.19;PF07690.11	Sugar (and other) transporter;; Major Facilitator Superfamily
Gglean002248.1	PF00130.17	Phorbol esters/diacylglycerol binding domain (C1 domain)
Gglean002249.1	PF08626.6	Transport protein Trs120 or TRAPPC9, TRAPP II complex subunit
Gglean002253.1	PF05129.8	Transcription elongation factor Elf1 like
Gglean002254.1	PF00225.18	Kinesin motor domain
Gglean002255.1	PF00806.14	Pumilio-family RNA binding repeat
Gglean002257.1	PF12931.2;PF12932.2	Sec23-binding domain of Sec16;; Vesicle coat trafficking protein Sec16 mid-region
Gglean002258.1	PF00004.24;PF07728.9	ATPase family associated with various cellular activities (AAA);; AAA domain (dynein-related subfamily)
Gglean002259.1	PF12436.3;PF14533.1;PF00443.24;PF13423.1;PF00917.21	ICP0-binding domain of Ubiquitin-specific protease 7;; Ubiquitin-specific protease C-terminal;; Ubiquitin carboxyl-terminal hydrolase;; Ubiquitin carboxyl-terminal hydrolase;; MATH domain
Gglean002260.1	PF00285.16	Citrate synthase
Gglean002261.1	PF01603.15	Protein phosphatase 2A regulatory B subunit (B56 family)
Gglean002262.1	PF01793.11	Glycolipid 2-alpha-mannosyltransferase
Gglean002263.1	PF04756.8	OST3 / OST6 family
Gglean002264.1	PF01494.14	FAD binding domain
Gglean002268.1	PF00621.15	RhoGEF domain
Gglean002269.1	PF00804.20;PF05739.14	Syntaxin;; SNARE domain
Gglean002270.1	PF00266.14	Aminotransferase class-V
Gglean002271.1	PF01679.12	Proteolipid membrane potential modulator
Gglean002272.1	PF04930.10	FUN14 family
Gglean002273.1	PF01218.13	Coproporphyrinogen III oxidase
Gglean002275.1	PF12584.3	Trafficking protein particle complex subunit 10, TRAPPC10
Gglean002276.1	PF00400.27	WD domain, G-beta repeat
Gglean002277.1	PF13640.1;PF13661.1;PF03171.15	2OG-Fe(II) oxygenase superfamily;; 2OG-Fe(II) oxygenase superfamily;; 2OG-Fe(II) oxygenase superfamily
Gglean002278.1	PF13532.1	2OG-Fe(II) oxygenase superfamily
Gglean002279.1	PF05208.8	ALG3 protein
Gglean002280.1	PF00557.19	Metallopeptidase family M24
Gglean002281.1	PF00270.24;PF00271.26;PF04851.10	DEAD/DEAH box helicase;; Helicase conserved C-terminal domain;; Type III restriction enzyme, res subunit
Gglean002282.1	PF04750.9	FAR-17a/AIG1-like protein
Gglean002283.1	PF00206.15;PF14698.1	Lyase;; Argininosuccinate lyase C-terminal
Gglean002284.1	PF05739.14;PF00804.20	SNARE domain;; Syntaxin
Gglean002286.1	PF01428.11	AN1-like Zinc finger
Gglean002287.1	PF00155.16	Aminotransferase class I and II
Gglean002288.1	PF02985.17;PF13646.1	HEAT repeat;; HEAT repeats
Gglean002290.1	PF00566.13;PF03398.9	Rab-GTPase-TBC domain;; Regulator of Vps4 activity in the MVB pathway
Gglean002294.1	PF01189.12	NOL1/NOP2/sun family
Gglean002296.1	PF00132.19;PF02020.13;PF00483.18	Bacterial transferase hexapeptide (six repeats);; eIF4-gamma/eIF5/eIF2-epsilon;; Nucleotidyl transferase
Gglean002298.1	PF00733.16;PF13537.1;PF13522.1	Asparagine synthase;; Glutamine amidotransferase domain;; Glutamine amidotransferase domain
Gglean002300.1	PF00270.24;PF00271.26	DEAD/DEAH box helicase;; Helicase conserved C-terminal domain
Gglean002301.1	PF00069.20;PF07714.12	Protein kinase domain;; Protein tyrosine kinase
Gglean002302.1	PF02178.14	AT hook motif
Gglean002303.1	PF01066.16	CDP-alcohol phosphatidyltransferase
Gglean002304.1	PF00454.22	Phosphatidylinositol 3- and 4-kinase
Gglean002306.1	PF09802.4	Preprotein translocase subunit Sec66
Gglean002308.1	PF04104.9	Eukaryotic and archaeal DNA primase, large subunit
Gglean002309.1	PF01066.16	CDP-alcohol phosphatidyltransferase
Gglean002310.1	PF07574.8;PF08746.6	Nse1 non-SMC component of SMC5-6 complex;; RING-like domain
Gglean002311.1	PF00225.18	Kinesin motor domain
Gglean002312.1	PF01693.11	Caulimovirus viroplasmin
Gglean002316.1	PF13926.1	Domain of unknown function (DUF4211)
Gglean002317.1	PF00069.20;PF07714.12	Protein kinase domain;; Protein tyrosine kinase
Gglean002318.1	PF14633.1;PF14878.1;PF14639.1;PF14635.1;PF14641.1;PF14632.1;PF00017.19;PF00575.18	SH2 domain;; Death-like domain of SPT6;; Holliday-junction resolvase-like of SPT6;; Helix-hairpin-helix motif;; Helix-turn-helix DNA-binding domain of SPT6;; Acidic N-terminal SPT6;; SH2 domain;; S1 RNA binding domain
Gglean002320.1	PF00448.17;PF02978.14;PF02881.14;PF02492.14;PF13671.1	SRP54-type protein, GTPase domain;; Signal peptide binding domain;; SRP54-type protein, helical bundle domain;; CobW/HypB/UreG, nucleotide-binding domain;; AAA domain
Gglean002321.1	PF03330.13	Rare lipoprotein A (RlpA)-like double-psi beta-barrel
Gglean002322.1	PF13460.1;PF01370.16	NADH(P)-binding;; NAD dependent epimerase/dehydratase family
Gglean002323.1	PF00406.17;PF05191.9;PF13207.1	Adenylate kinase;; Adenylate kinase, active site lid;; AAA domain
Gglean002324.1	PF07962.7	Replication Fork Protection Component Swi3
Gglean002326.1	PF00125.19;PF03847.8	Core histone H2A/H2B/H3/H4;; Transcription initiation factor TFIID subunit A
Gglean002327.1	PF03177.9;PF08801.6	Non-repetitive/WGA-negative nucleoporin C-terminal;; Nup133 N terminal like
Gglean002330.1	PF08635.5;PF01408.17	Putative oxidoreductase C terminal;; Oxidoreductase family, NAD-binding Rossmann fold
Gglean002331.1	PF03936.11	Terpene synthase family, metal binding domain
Gglean002332.1	PF01249.13	Ribosomal protein S21e
Gglean002334.1	PF01253.17	Translation initiation factor SUI1
Gglean002335.1	PF00106.20	short chain dehydrogenase
Gglean002336.1	PF00106.20	short chain dehydrogenase
Gglean002337.1	PF14259.1	RNA recognition motif (a.k.a. RRM, RBD, or RNP domain)
Gglean002338.1	PF00004.24;PF07728.9;PF07724.9;PF13191.1;PF13401.1;PF05673.8	ATPase family associated with various cellular activities (AAA);; AAA domain (dynein-related subfamily);; AAA domain (Cdc48 subfamily);; AAA ATPase domain;; AAA domain;; Protein of unknown function (DUF815)
Gglean002339.1	PF04101.11	Glycosyltransferase family 28 C-terminal domain
Gglean002342.1	PF08699.5	Domain of unknown function (DUF1785)
Gglean002343.1	PF02170.17	PAZ domain
Gglean002344.1	PF00183.13;PF02518.21;PF13589.1	Hsp90 protein;; Histidine kinase-, DNA gyrase B-, and HSP90-like ATPase;; Histidine kinase-, DNA gyrase B-, and HSP90-like ATPase
Gglean002345.1	PF00781.19	Diacylglycerol kinase catalytic domain
Gglean002347.1	PF02779.19;PF02780.15	Transketolase, pyrimidine binding domain;; Transketolase, C-terminal domain
Gglean002350.1	PF00071.17;PF08477.8;PF00025.16;PF01926.18;PF04670.7	Ras family;; Miro-like protein;; ADP-ribosylation factor family;; 50S ribosome-binding GTPase;; Gtr1/RagA G protein conserved region
Gglean002351.1	PF02765.12	Telomeric single stranded DNA binding POT1/CDC13
Gglean002353.1	PF00082.17;PF01483.15	Subtilase family;; Proprotein convertase P-domain
Gglean002354.1	PF00145.12;PF01426.13;PF12047.3	C-5 cytosine-specific DNA methylase;; BAH domain;; Cytosine specific DNA methyltransferase replication foci domain
Gglean002355.1	PF00514.18;PF01602.15;PF13646.1;PF12717.2;PF02985.17	Armadillo/beta-catenin-like repeat;; Adaptin N terminal region;; HEAT repeats;; non-SMC mitotic condensation complex subunit 1;; HEAT repeat
Gglean002356.1	PF08695.5	Cytochrome oxidase complex assembly protein 1
Gglean002357.1	PF00447.12	HSF-type DNA-binding
Gglean002358.1	PF04109.11	Autophagy protein Apg9
Gglean002359.1	PF10300.4;PF14559.1;PF12895.2;PF13432.1;PF13428.1	Protein of unknown function (DUF3808);; Tetratricopeptide repeat;; Anaphase-promoting complex, cyclosome, subunit 3;; Tetratricopeptide repeat;; Tetratricopeptide repeat
Gglean002360.1	PF01121.15	Dephospho-CoA kinase
Gglean002361.1	PF13091.1	PLD-like domain
Gglean002365.1	PF00160.16	Cyclophilin type peptidyl-prolyl cis-trans isomerase/CLD
Gglean002366.1	PF00400.27;PF12937.2;PF00646.28;PF11715.3	WD domain, G-beta repeat;; F-box-like;; F-box domain;; Nucleoporin Nup120/160
Gglean002369.1	PF00583.19;PF04055.16	Acetyltransferase (GNAT) family;; Radical SAM superfamily
Gglean002370.1	PF11709.3	Mitochondrial ribosomal protein subunit
Gglean002371.1	PF09416.5;PF13087.1;PF13086.1;PF13245.1;PF13604.1;PF04851.10;PF01443.13;PF09848.4;PF00580.16	RNA helicase (UPF2 interacting domain);; AAA domain;; AAA domain;; Part of AAA domain;; AAA domain;; Type III restriction enzyme, res subunit;; Viral (Superfamily 1) RNA helicase;; Uncharacterized conserved protein (DUF2075);; UvrD/REP helicase N-terminal domain
Gglean002373.1	PF00928.16	Adaptor complexes medium subunit family
Gglean002374.1	PF11699.3;PF07883.6	Mif2/CENP-C like;; Cupin domain
Gglean002375.1	PF03054.11;PF03054.11	tRNA methyl transferase;; tRNA methyl transferase
Gglean002376.1	PF04499.10	SIT4 phosphatase-associated protein
Gglean002377.1	PF02776.13;PF02775.16;PF00205.17	Thiamine pyrophosphate enzyme, N-terminal TPP binding domain;; Thiamine pyrophosphate enzyme, C-terminal TPP binding domain;; Thiamine pyrophosphate enzyme, central domain
Gglean002380.1	PF12937.2	F-box-like
Gglean002381.1	PF00107.21;PF13602.1;PF08240.7	Zinc-binding dehydrogenase;; Zinc-binding dehydrogenase;; Alcohol dehydrogenase GroES-like domain
Gglean002386.1	PF08561.5	Mitochondrial ribosomal protein L37
Gglean002387.1	PF00443.24;PF13423.1	Ubiquitin carboxyl-terminal hydrolase;; Ubiquitin carboxyl-terminal hydrolase
Gglean002388.1	PF13012.1;PF01398.16	Maintenance of mitochondrial structure and function;; JAB1/Mov34/MPN/PAD-1 ubiquitin protease
Gglean002389.1	PF00071.17;PF08477.8;PF00025.16;PF00009.22	Ras family;; Miro-like protein;; ADP-ribosylation factor family;; Elongation factor Tu GTP binding domain
Gglean002390.1	PF04037.8;PF04046.11	Domain of unknown function (DUF382);; PSP
Gglean002391.1	PF00749.16;PF03950.13;PF13410.1;PF00043.20	tRNA synthetases class I (E and Q), catalytic domain;; tRNA synthetases class I (E and Q), anti-codon binding domain;; Glutathione S-transferase, C-terminal domain;; Glutathione S-transferase, C-terminal domain
Gglean002395.1	PF07690.11	Major Facilitator Superfamily
Gglean002398.1	PF00106.20;PF13561.1;PF08659.5	short chain dehydrogenase;; Enoyl-(Acyl carrier protein) reductase;; KR domain
Gglean002399.1	PF07859.8;PF10340.4	alpha/beta hydrolase fold;; Protein of unknown function (DUF2424)
Gglean002400.1	PF00085.15	Thioredoxin
Gglean002401.1	PF08315.7	cwf18 pre-mRNA splicing factor
Gglean002402.1	PF09729.4	Gti1/Pac2 family
Gglean002403.1	PF06881.6	RNA polymerase II transcription factor SIII (Elongin) subunit A
Gglean002406.1	PF00290.15;PF00291.20	Tryptophan synthase alpha chain;; Pyridoxal-phosphate dependent enzyme
Gglean002407.1	PF01008.12	Initiation factor 2 subunit family
Gglean002409.1	PF03798.11	TLC domain
Gglean002410.1	PF07928.7;PF10475.4	Vps54-like protein;; Protein of unknown function N-terminal domain (DUF2450)
Gglean002413.1	PF00400.27	WD domain, G-beta repeat
Gglean002424.1	PF00190.17	Cupin
Gglean002425.1	PF07498.7;PF02037.22	Rho termination factor, N-terminal domain;; SAP domain
Gglean002426.1	PF05769.6	Protein of unknown function (DUF837)
Gglean002428.1	PF02798.15;PF13409.1;PF13417.1;PF00043.20;PF13410.1;PF14497.1	Glutathione S-transferase, N-terminal domain;; Glutathione S-transferase, N-terminal domain;; Glutathione S-transferase, N-terminal domain;; Glutathione S-transferase, C-terminal domain;; Glutathione S-transferase, C-terminal domain;; Glutathione S-transferase, C-terminal domain
Gglean002429.1	PF00614.17;PF13091.1;PF00787.19	Phospholipase D Active site motif;; PLD-like domain;; PX domain
Gglean002430.1	PF08083.6;PF08082.6;PF10598.4	PROCN (NUC071) domain;; PRO8NT (NUC069), PrP8 N-terminal domain;; RNA recognition motif of the spliceosomal PrP8
Gglean002431.1	PF00439.20;PF07524.8	Bromodomain;; Bromodomain associated
Gglean002432.1	PF00133.17;PF09334.6	tRNA synthetases class I (I, L, M and V);; tRNA synthetases class I (M)
Gglean002434.1	PF00400.27;PF08662.6	WD domain, G-beta repeat;; Eukaryotic translation initiation factor eIF2A
Gglean002435.1	PF00067.17	Cytochrome P450
Gglean002436.1	PF00098.18	Zinc knuckle
Gglean002445.1	PF07690.11;PF00067.17	Major Facilitator Superfamily;; Cytochrome P450
Gglean002446.1	PF00067.17	Cytochrome P450
Gglean002449.1	PF00012.15	Hsp70 protein
Gglean002450.1	PF00012.15	Hsp70 protein
Gglean002463.1	PF00067.17	Cytochrome P450
Gglean002469.1	PF00400.27	WD domain, G-beta repeat
Gglean002470.1	PF02207.15;PF02617.12	Putative zinc finger in N-recognin (UBR box);; ATP-dependent Clp protease adaptor protein ClpS
Gglean002472.1	PF12271.3	Chitin synthase III catalytic subunit
Gglean002473.1	PF12572.3	Protein of unknown function (DUF3752)
Gglean002474.1	PF00106.20;PF13561.1;PF08659.5	short chain dehydrogenase;; Enoyl-(Acyl carrier protein) reductase;; KR domain
Gglean002475.1	PF00503.15;PF00025.16	G-protein alpha subunit;; ADP-ribosylation factor family
Gglean002476.1	PF01412.13	Putative GTPase activating protein for Arf
Gglean002477.1	PF01096.13;PF02150.11;PF09526.5	Transcription factor S-II (TFIIS);; RNA polymerases M/15 Kd subunit;; Probable metal-binding protein (DUF2387)
Gglean002478.1	PF03134.14	TB2/DP1, HVA22 family
Gglean002479.1	PF07690.11;PF05978.11	Major Facilitator Superfamily;; Ion channel regulatory protein UNC-93
Gglean002480.1	PF08234.7	Chromosome segregation protein Spc25
Gglean002481.1	PF08385.7	Dynein heavy chain, N-terminal region 1
Gglean002482.1	PF01738.13	Dienelactone hydrolase family
Gglean002485.1	PF00488.16;PF05192.13;PF05190.13;PF05188.12	MutS domain V;; MutS domain III;; MutS family domain IV;; MutS domain II
Gglean002487.1	PF01266.19;PF00890.19	FAD dependent oxidoreductase;; FAD binding domain
Gglean002489.1	PF00790.14;PF01363.16	VHS domain;; FYVE zinc finger
Gglean002493.1	PF08623.5;PF13646.1;PF02985.17;PF12717.2;PF13513.1;PF12348.3;PF01602.15;PF12755.2;PF10274.4	TATA-binding protein interacting (TIP20);; HEAT repeats;; HEAT repeat;; non-SMC mitotic condensation complex subunit 1;; HEAT-like repeat;; CLASP N terminal;; Adaptin N terminal region;; Vacuolar 14 Fab1-binding region;; Parkin co-regulated protein
Gglean002494.1	PF05724.6;PF13847.1;PF13649.1;PF12847.2;PF13659.1;PF08241.7;PF03848.9	Thiopurine S-methyltransferase (TPMT);; Methyltransferase domain;; Methyltransferase domain;; Methyltransferase domain;; Methyltransferase domain;; Methyltransferase domain;; Tellurite resistance protein TehB
Gglean002496.1	PF00271.26;PF00270.24	Helicase conserved C-terminal domain;; DEAD/DEAH box helicase
Gglean002497.1	PF00505.14;PF09011.5	HMG (high mobility group) box;; HMG-box domain
Gglean002498.1	PF05047.11	Mitochondrial ribosomal protein L51 / S25 / CI-B8 domain
Gglean002502.1	PF00026.18	Eukaryotic aspartyl protease
Gglean002503.1	PF00069.20	Protein kinase domain
Gglean002504.1	PF01853.13;PF11717.3	MOZ/SAS family;; RNA binding activity-knot of a chromodomain
Gglean002505.1	PF00069.20;PF07714.12;PF14531.1	Protein kinase domain;; Protein tyrosine kinase;; Kinase-like
Gglean002506.1	PF00004.24;PF09336.5;PF04212.13;PF05496.7;PF07728.9;PF01695.12;PF07724.9;PF05673.8	ATPase family associated with various cellular activities (AAA);; Vps4 C terminal oligomerisation domain;; MIT (microtubule interacting and transport) domain;; Holliday junction DNA helicase ruvB N-terminus;; AAA domain (dynein-related subfamily);; IstB-like ATP binding protein;; AAA domain (Cdc48 subfamily);; Protein of unknown function (DUF815)
Gglean002507.1	PF13862.1	p21-C-terminal region-binding protein
Gglean002509.1	PF02469.17	Fasciclin domain
Gglean002510.1	PF00270.24;PF00271.26	DEAD/DEAH box helicase;; Helicase conserved C-terminal domain
Gglean002511.1	PF03416.14	Peptidase family C54
Gglean002512.1	PF10250.4	GDP-fucose protein O-fucosyltransferase
Gglean002513.1	PF10250.4	GDP-fucose protein O-fucosyltransferase
Gglean002514.1	PF08712.6;PF01106.12	Scaffold protein Nfu/NifU N terminal;; NifU-like domain
Gglean002515.1	PF13692.1	Glycosyl transferases group 1
Gglean002516.1	PF00649.13	Copper fist DNA binding domain
Gglean002517.1	PF00622.23;PF10607.4	SPRY domain;; CTLH/CRA C-terminal to LisH motif domain
Gglean002518.1	PF01769.11	Divalent cation transporter
Gglean002520.1	PF00723.16	Glycosyl hydrolases family 15
Gglean002521.1	PF01521.15	Iron-sulphur cluster biosynthesis
Gglean002528.1	PF00071.17;PF08477.8;PF00025.16	Ras family;; Miro-like protein;; ADP-ribosylation factor family
Gglean002529.1	PF00270.24;PF00271.26	DEAD/DEAH box helicase;; Helicase conserved C-terminal domain
Gglean002530.1	PF03114.13;PF00018.23;PF14604.1;PF07653.12	BAR domain;; SH3 domain;; Variant SH3 domain;; Variant SH3 domain
Gglean002531.1	PF01237.13	Oxysterol-binding protein
Gglean002532.1	PF00145.12	C-5 cytosine-specific DNA methylase
Gglean002533.1	PF01873.12;PF02020.13	Domain found in IF2B/IF5;; eIF4-gamma/eIF5/eIF2-epsilon
Gglean002535.1	PF00176.18;PF00439.20;PF00271.26;PF07529.8;PF14619.1;PF08880.6	SNF2 family N-terminal domain;; Bromodomain;; Helicase conserved C-terminal domain;; HSA;; Snf2-ATP coupling, chromatin remodelling complex;; QLQ
Gglean002536.1	PF02374.10	Anion-transporting ATPase
Gglean002537.1	PF02374.10	Anion-transporting ATPase
Gglean002539.1	PF04419.9	4F5 protein family
Gglean002540.1	PF10104.4	Di-sulfide bridge nucleocytoplasmic transport domain
Gglean002544.1	PF00026.18	Eukaryotic aspartyl protease
Gglean002546.1	PF00200.18;PF01562.14;PF13583.1	Disintegrin;; Reprolysin family propeptide;; Metallo-peptidase family M12B Reprolysin-like
Gglean002547.1	PF00521.15;PF00005.22;PF00204.20;PF12848.2;PF01751.17;PF13304.1;PF02518.21;PF13207.1;PF01926.18;PF13555.1;PF03193.11;PF08477.8	DNA gyrase/topoisomerase IV, subunit A;; ABC transporter;; DNA gyrase B;; ABC transporter;; Toprim domain;; AAA domain;; Histidine kinase-, DNA gyrase B-, and HSP90-like ATPase;; AAA domain;; 50S ribosome-binding GTPase;; P-loop containing region of AAA domain;; Protein of unknown function, DUF258;; Miro-like protein
Gglean002549.1	PF12937.2	F-box-like
Gglean002550.1	PF13867.1	Sin3 binding region of histone deacetylase complex subunit SAP30
Gglean002552.1	PF00378.15;PF05348.6	Enoyl-CoA hydratase/isomerase family;; Proteasome maturation factor UMP1
Gglean002553.1	PF05406.10;PF00644.15	WGR domain;; Poly(ADP-ribose) polymerase catalytic domain
Gglean002554.1	PF13302.1;PF08445.5;PF00583.19	Acetyltransferase (GNAT) domain;; FR47-like protein;; Acetyltransferase (GNAT) family
Gglean002555.1	PF00171.17	Aldehyde dehydrogenase family
Gglean002556.1	PF00171.17	Aldehyde dehydrogenase family
Gglean002557.1	PF01184.14	GPR1/FUN34/yaaH family
Gglean002558.1	PF13419.1;PF13242.1	Haloacid dehalogenase-like hydrolase;; HAD-hyrolase-like
Gglean002559.1	PF00443.24;PF02148.14;PF00627.26;PF13423.1	Ubiquitin carboxyl-terminal hydrolase;; Zn-finger in ubiquitin-hydrolases and other protein;; UBA/TS-N domain;; Ubiquitin carboxyl-terminal hydrolase
Gglean002560.1	PF00956.13	Nucleosome assembly protein (NAP)
Gglean002561.1	PF00621.15;PF00780.17;PF15405.1	RhoGEF domain;; CNH domain;; Pleckstrin homology domain
Gglean002562.1	PF04909.9	Amidohydrolase
Gglean002566.1	PF02146.12	Sir2 family
Gglean002567.1	PF13857.1;PF13637.1;PF00023.25;PF13606.1	Ankyrin repeats (many copies);; Ankyrin repeats (many copies);; Ankyrin repeat;; Ankyrin repeat
Gglean002568.1	PF01237.13;PF00169.24	Oxysterol-binding protein;; PH domain
Gglean002569.1	PF07690.11	Major Facilitator Superfamily
Gglean002570.1	PF00174.14;PF03404.11;PF00173.23;PF00970.19	Oxidoreductase molybdopterin binding domain;; Mo-co oxidoreductase dimerisation domain;; Cytochrome b5-like Heme/Steroid binding domain;; Oxidoreductase FAD-binding domain
Gglean002571.1	PF00175.16;PF08030.7	Oxidoreductase NAD-binding domain;; Ferric reductase NAD binding domain
Gglean002573.1	PF13561.1;PF00106.20;PF08659.5	Enoyl-(Acyl carrier protein) reductase;; short chain dehydrogenase;; KR domain
Gglean002574.1	PF07859.8;PF00135.23	alpha/beta hydrolase fold;; Carboxylesterase family
Gglean002579.1	PF10337.4	Protein of unknown function (DUF2422)
Gglean002580.1	PF10337.4	Protein of unknown function (DUF2422)
Gglean002581.1	PF10334.4	Protein of unknown function (DUF2421)
Gglean002582.1	PF05008.10;PF12352.3	Vesicle transport v-SNARE protein N-terminus;; Snare region anchored in the vesicle membrane C-terminus
Gglean002583.1	PF04117.7	Mpv17 / PMP22 family
Gglean002585.1	PF00344.15	SecY translocase
Gglean002586.1	PF00176.18;PF00271.26	SNF2 family N-terminal domain;; Helicase conserved C-terminal domain
Gglean002589.1	PF12738.2;PF00533.21	twin BRCT domain;; BRCA1 C Terminus (BRCT) domain
Gglean002590.1	PF00566.13	Rab-GTPase-TBC domain
Gglean002591.1	PF01423.17	LSM domain
Gglean002593.1	PF00505.14;PF09011.5	HMG (high mobility group) box;; HMG-box domain
Gglean002595.1	PF03378.10;PF08506.5	CAS/CSE protein, C-terminus;; Cse1
Gglean002596.1	PF07992.9;PF04324.10;PF00070.22;PF01077.17;PF01266.19;PF03460.12	Pyridine nucleotide-disulphide oxidoreductase;; BFD-like [2Fe-2S] binding domain;; Pyridine nucleotide-disulphide oxidoreductase;; Nitrite and sulphite reductase 4Fe-4S domain;; FAD dependent oxidoreductase;; Nitrite/Sulfite reductase ferredoxin-like half domain
Gglean002597.1	PF13738.1;PF00743.14;PF13434.1;PF07992.9;PF00070.22;PF01266.19	Pyridine nucleotide-disulphide oxidoreductase;; Flavin-binding monooxygenase-like;; L-lysine 6-monooxygenase (NADPH-requiring);; Pyridine nucleotide-disulphide oxidoreductase;; Pyridine nucleotide-disulphide oxidoreductase;; FAD dependent oxidoreductase
Gglean002599.1	PF01636.18;PF00501.23;PF01633.15	Phosphotransferase enzyme family;; AMP-binding enzyme;; Choline/ethanolamine kinase
Gglean002600.1	PF01636.18;PF00501.23;PF01633.15	Phosphotransferase enzyme family;; AMP-binding enzyme;; Choline/ethanolamine kinase
Gglean002602.1	PF03443.9	Glycosyl hydrolase family 61
Gglean002603.1	PF00172.13	Fungal Zn(2)-Cys(6) binuclear cluster domain
Gglean002604.1	PF00383.17	Cytidine and deoxycytidylate deaminase zinc-binding region
Gglean002606.1	PF01253.17;PF01472.15	Translation initiation factor SUI1;; PUA domain
Gglean002607.1	PF10497.4	Zinc-finger domain of monoamine-oxidase A repressor R1
Gglean002608.1	PF00012.15	Hsp70 protein
Gglean002610.1	PF05049.8;PF01926.18	Interferon-inducible GTPase (IIGP);; 50S ribosome-binding GTPase
Gglean002613.1	PF12937.2	F-box-like
Gglean002614.1	PF06991.6	Splicing factor, Prp19-binding domain
Gglean002616.1	PF00069.20;PF07714.12	Protein kinase domain;; Protein tyrosine kinase
Gglean002617.1	PF01161.15	Phosphatidylethanolamine-binding protein
Gglean002618.1	PF01423.17	LSM domain
Gglean002619.1	PF08238.7	Sel1 repeat
Gglean002620.1	PF01933.13	Uncharacterised protein family UPF0052
Gglean002622.1	PF00574.18	Clp protease
Gglean002623.1	PF00515.23;PF13414.1;PF07719.12;PF13181.1;PF13432.1;PF13424.1;PF10256.4;PF13428.1;PF13176.1;PF14559.1;PF13431.1;PF13174.1;PF12895.2;PF13429.1;PF13371.1;PF09976.4	Tetratricopeptide repeat;; TPR repeat;; Tetratricopeptide repeat;; Tetratricopeptide repeat;; Tetratricopeptide repeat;; Tetratricopeptide repeat;; Golgin subfamily A member 7/ERF4 family;; Tetratricopeptide repeat;; Tetratricopeptide repeat;; Tetratricopeptide repeat;; Tetratricopeptide repeat;; Tetratricopeptide repeat;; Anaphase-promoting complex, cyclosome, subunit 3;; Tetratricopeptide repea…
Gglean002624.1	PF00170.16;PF08601.5	bZIP transcription factor;; Transcription factor PAP1
Gglean002626.1	PF02735.11;PF08785.6;PF03731.10	Ku70/Ku80 beta-barrel domain;; Ku C terminal domain like;; Ku70/Ku80 N-terminal alpha/beta domain
Gglean002627.1	PF04097.9	Nup93/Nic96
Gglean002628.1	PF00628.24	PHD-finger
Gglean002630.1	PF01363.16	FYVE zinc finger
Gglean002632.1	PF09377.5;PF01172.13	SBDS protein C-terminal domain;; Shwachman-Bodian-Diamond syndrome (SBDS) protein
Gglean002633.1	PF08123.8	Histone methylation protein DOT1
Gglean002634.1	PF00022.14	Actin
Gglean002637.1	PF00102.22;PF00581.15	Protein-tyrosine phosphatase;; Rhodanese-like domain
Gglean002638.1	PF01735.13	Lysophospholipase catalytic domain
Gglean002640.1	PF04408.18;PF07717.11;PF00271.26;PF00270.24	Helicase associated domain (HA2);; Oligonucleotide/oligosaccharide-binding (OB)-fold;; Helicase conserved C-terminal domain;; DEAD/DEAH box helicase
Gglean002642.1	PF00005.22;PF13304.1	ABC transporter;; AAA domain
Gglean002643.1	PF01379.15;PF03900.10	Porphobilinogen deaminase, dipyromethane cofactor binding domain;; Porphobilinogen deaminase, C-terminal domain
Gglean002644.1	PF00179.21	Ubiquitin-conjugating enzyme
Gglean002645.1	PF13847.1;PF08241.7;PF13649.1;PF12847.2;PF01209.13;PF00581.15;PF13489.1;PF13659.1;PF06325.8;PF08242.7;PF05175.9;PF01135.14	Methyltransferase domain;; Methyltransferase domain;; Methyltransferase domain;; Methyltransferase domain;; ubiE/COQ5 methyltransferase family;; Rhodanese-like domain;; Methyltransferase domain;; Methyltransferase domain;; Ribosomal protein L11 methyltransferase (PrmA);; Methyltransferase domain;; Methyltransferase small domain;; Protein-L-isoaspartate(D-aspartate) O-methyltransferase (PCMT)
Gglean002646.1	PF00071.17;PF08477.8;PF00025.16;PF01926.18;PF00009.22;PF04670.7	Ras family;; Miro-like protein;; ADP-ribosylation factor family;; 50S ribosome-binding GTPase;; Elongation factor Tu GTP binding domain;; Gtr1/RagA G protein conserved region
Gglean002647.1	PF01055.21	Glycosyl hydrolases family 31
Gglean002649.1	PF03635.12	Vacuolar protein sorting-associated protein 35
Gglean002650.1	PF01280.15	Ribosomal protein L19e
Gglean002653.1	PF12937.2;PF00646.28	F-box-like;; F-box domain
Gglean002654.1	PF05764.8;PF08265.6	YL1 nuclear protein;; YL1 nuclear protein C-terminal domain
Gglean002659.1	PF01619.13	Proline dehydrogenase
Gglean002661.1	PF00026.18	Eukaryotic aspartyl protease
Gglean002664.1	PF04997.7	RNA polymerase Rpb1, domain 1
Gglean002665.1	PF04998.12;PF00623.15;PF04992.9;PF04997.7;PF04983.13;PF04990.7;PF05000.12	RNA polymerase Rpb1, domain 5;; RNA polymerase Rpb1, domain 2;; RNA polymerase Rpb1, domain 6;; RNA polymerase Rpb1, domain 1;; RNA polymerase Rpb1, domain 3;; RNA polymerase Rpb1, domain 7;; RNA polymerase Rpb1, domain 4
Gglean002666.1	PF01425.16	Amidase
Gglean002667.1	PF09970.4	Nucleotidyl transferase of unknown function (DUF2204)
Gglean002668.1	PF00149.23;PF12850.2	Calcineurin-like phosphoesterase;; Calcineurin-like phosphoesterase superfamily domain
Gglean002669.1	PF00067.17	Cytochrome P450
Gglean002670.1	PF01595.15;PF00571.23	Domain of unknown function DUF21;; CBS domain
Gglean002671.1	PF00198.18;PF00364.17;PF02817.12	2-oxoacid dehydrogenases acyltransferase (catalytic domain);; Biotin-requiring enzyme;; e3 binding domain
Gglean002672.1	PF00069.20;PF07714.12	Protein kinase domain;; Protein tyrosine kinase
Gglean002673.1	PF01433.15;PF09127.6;PF13485.1	Peptidase family M1;; Leukotriene A4 hydrolase, C-terminal;; Peptidase MA superfamily
Gglean002675.1	PF00962.17	Adenosine/AMP deaminase
Gglean002676.1	PF08613.6;PF00134.18	Cyclin;; Cyclin, N-terminal domain
Gglean002677.1	PF00749.16;PF08631.5	tRNA synthetases class I (E and Q), catalytic domain;; Meiosis protein SPO22/ZIP4 like
Gglean002678.1	PF04051.11	Transport protein particle (TRAPP) component
Gglean002680.1	PF00067.17	Cytochrome P450
Gglean002685.1	PF00637.15	Region in Clathrin and VPS
Gglean002694.1	PF01244.16	Membrane dipeptidase (Peptidase family M19)
Gglean002696.1	PF13419.1;PF13242.1	Haloacid dehalogenase-like hydrolase;; HAD-hyrolase-like
Gglean002697.1	PF00565.12;PF00567.19	Staphylococcal nuclease homologue;; Tudor domain
Gglean002698.1	PF01250.12	Ribosomal protein S6
Gglean002699.1	PF05970.9;PF13604.1;PF09848.4	PIF1-like helicase;; AAA domain;; Uncharacterized conserved protein (DUF2075)
Gglean002700.1	PF00106.20	short chain dehydrogenase
Gglean002702.1	PF01612.15	3'-5' exonuclease
Gglean002705.1	PF00667.15;PF00258.20;PF00175.16	FAD binding domain;; Flavodoxin;; Oxidoreductase NAD-binding domain
Gglean002706.1	PF05546.6	She9 / Mdm33 family
Gglean002707.1	PF01230.18;PF11969.3;PF04677.10	HIT domain;; Scavenger mRNA decapping enzyme C-term binding;; Protein similar to CwfJ C-terminus 1
Gglean002722.1	PF00400.27;PF08581.5	WD domain, G-beta repeat;; Tup N-terminal
Gglean002724.1	PF01565.18;PF08031.7	FAD binding domain;; Berberine and berberine like
Gglean002726.1	PF03060.10	Nitronate monooxygenase
Gglean002728.1	PF05192.13;PF00488.16;PF01624.15;PF05188.12;PF05190.13	MutS domain III;; MutS domain V;; MutS domain I;; MutS domain II;; MutS family domain IV
Gglean002729.1	PF00488.16	MutS domain V
Gglean002730.1	PF00722.16	Glycosyl hydrolases family 16
Gglean002731.1	PF08510.7	PIG-P
Gglean002733.1	PF04127.10	DNA / pantothenate metabolism flavoprotein
Gglean002735.1	PF04488.10	Glycosyltransferase sugar-binding region containing DXD motif
Gglean002744.1	PF03169.10	OPT oligopeptide transporter protein
Gglean002745.1	PF06201.8	PITH domain
Gglean002746.1	PF13934.1	Nuclear pore complex assembly
Gglean002749.1	PF04811.10;PF04815.10;PF08033.7;PF04810.10;PF00626.17;PF00397.21	Sec23/Sec24 trunk domain;; Sec23/Sec24 helical domain;; Sec23/Sec24 beta-sandwich domain;; Sec23/Sec24 zinc finger;; Gelsolin repeat;; WW domain
Gglean002750.1	PF12656.2	DExH-box splicing factor binding site
Gglean002751.1	PF00067.17	Cytochrome P450
Gglean002753.1	PF01423.17	LSM domain
Gglean002754.1	PF00295.12	Glycosyl hydrolases family 28
Gglean002756.1	PF03795.9	YCII-related domain
Gglean002758.1	PF04321.12;PF01370.16;PF02719.10;PF07993.7;PF13460.1	RmlD substrate binding domain;; NAD dependent epimerase/dehydratase family;; Polysaccharide biosynthesis protein;; Male sterility protein;; NADH(P)-binding
Gglean002760.1	PF00067.17	Cytochrome P450
Gglean002761.1	PF00067.17	Cytochrome P450
Gglean002762.1	PF00067.17	Cytochrome P450
Gglean002764.1	PF03105.14;PF03124.9	SPX domain;; EXS family
Gglean002767.1	PF03839.11	Translocation protein Sec62
Gglean002769.1	PF08069.7;PF00312.17	Ribosomal S13/S15 N-terminal domain;; Ribosomal protein S15
Gglean002771.1	PF00248.16	Aldo/keto reductase family
Gglean002773.1	PF01663.17	Type I phosphodiesterase / nucleotide pyrophosphatase
Gglean002775.1	PF01138.16	3' exoribonuclease family, domain 1
Gglean002777.1	PF04157.11	EAP30/Vps36 family
Gglean002782.1	PF01521.15	Iron-sulphur cluster biosynthesis
Gglean002783.1	PF09286.6;PF00082.17	Pro-kumamolisin, activation domain;; Subtilase family
Gglean002785.1	PF00348.12	Polyprenyl synthetase
Gglean002786.1	PF12074.3	Domain of unknown function (DUF3554)
Gglean002787.1	PF13513.1;PF13646.1;PF02985.17;PF12348.3;PF12074.3;PF12755.2;PF01602.15;PF12717.2;PF12333.3;PF12765.2	HEAT-like repeat;; HEAT repeats;; HEAT repeat;; CLASP N terminal;; Domain of unknown function (DUF3554);; Vacuolar 14 Fab1-binding region;; Adaptin N terminal region;; non-SMC mitotic condensation complex subunit 1;; Rix1 complex component involved in 60S ribosome maturation;; HEAT repeat associated with sister chromatid cohesion
Gglean002788.1	PF03795.9	YCII-related domain
Gglean002789.1	PF13378.1;PF02746.11;PF01188.16	Enolase C-terminal domain-like;; Mandelate racemase / muconate lactonizing enzyme, N-terminal domain;; Mandelate racemase / muconate lactonizing enzyme, C-terminal domain
Gglean002791.1	PF00005.22	ABC transporter
Gglean002792.1	PF00005.22	ABC transporter
Gglean002795.1	PF13450.1;PF01266.19;PF01593.19;PF01946.12	NAD(P)-binding Rossmann-like domain;; FAD dependent oxidoreductase;; Flavin containing amine oxidoreductase;; Thi4 family
Gglean002796.1	PF01480.12	PWI domain
Gglean002799.1	PF00069.20;PF07714.12	Protein kinase domain;; Protein tyrosine kinase
Gglean002800.1	PF00069.20;PF07714.12	Protein kinase domain;; Protein tyrosine kinase
Gglean002802.1	PF01423.17	LSM domain
Gglean002803.1	PF03941.10	Inner centromere protein, ARK binding region
Gglean002805.1	PF10058.4	Predicted integral membrane metal-binding protein (DUF2296)
Gglean002806.1	PF00501.23;PF07993.7;PF01370.16	AMP-binding enzyme;; Male sterility protein;; NAD dependent epimerase/dehydratase family
Gglean002808.1	PF00646.28;PF12937.2	F-box domain;; F-box-like
Gglean002811.1	PF00505.14	HMG (high mobility group) box
Gglean002813.1	PF01145.20	SPFH domain / Band 7 family
Gglean002817.1	PF00270.24;PF00271.26;PF04851.10	DEAD/DEAH box helicase;; Helicase conserved C-terminal domain;; Type III restriction enzyme, res subunit
Gglean002818.1	PF12710.2;PF13419.1;PF06888.7	haloacid dehalogenase-like hydrolase;; Haloacid dehalogenase-like hydrolase;; Putative Phosphatase
Gglean002819.1	PF01092.14	Ribosomal protein S6e
Gglean002822.1	PF13424.1	Tetratricopeptide repeat
Gglean002824.1	PF07961.6	MBA1-like protein
Gglean002827.1	PF04840.7;PF04841.8	Vps16, C-terminal region;; Vps16, N-terminal region
Gglean002828.1	PF06985.6	Heterokaryon incompatibility protein (HET)
Gglean002835.1	PF03151.11	Triose-phosphate Transporter family
Gglean002841.1	PF03070.11	TENA/THI-4/PQQC family
Gglean002842.1	PF13589.1	Histidine kinase-, DNA gyrase B-, and HSP90-like ATPase
Gglean002846.1	PF06428.6	GDP/GTP exchange factor Sec2p
Gglean002848.1	PF07690.11	Major Facilitator Superfamily
Gglean002850.1	PF01380.17;PF00310.16;PF13522.1;PF13537.1;PF13230.1	SIS domain;; Glutamine amidotransferases class-II;; Glutamine amidotransferase domain;; Glutamine amidotransferase domain;; Glutamine amidotransferases class-II
Gglean002854.1	PF05176.9	ATP10 protein
Gglean002856.1	PF00083.19;PF07690.11	Sugar (and other) transporter;; Major Facilitator Superfamily
Gglean002857.1	PF00400.27;PF04003.7	WD domain, G-beta repeat;; Dip2/Utp12 Family
Gglean002858.1	PF06985.6	Heterokaryon incompatibility protein (HET)
Gglean002863.1	PF00270.24;PF00271.26	DEAD/DEAH box helicase;; Helicase conserved C-terminal domain
Gglean002864.1	PF04488.10	Glycosyltransferase sugar-binding region containing DXD motif
Gglean002866.1	PF08588.5	Protein of unknown function (DUF1769)
Gglean002867.1	PF15410.1	Pleckstrin homology domain
Gglean002868.1	PF00149.23	Calcineurin-like phosphoesterase
Gglean002869.1	PF03937.11	Flavinator of succinate dehydrogenase
Gglean002870.1	PF08588.5	Protein of unknown function (DUF1769)
Gglean002872.1	PF07859.8;PF10340.4	alpha/beta hydrolase fold;; Protein of unknown function (DUF2424)
Gglean002873.1	PF12697.2;PF00561.15;PF12695.2;PF12146.3	Alpha/beta hydrolase family;; alpha/beta hydrolase fold;; Alpha/beta hydrolase family;; Putative lysophospholipase
Gglean002874.1	PF00775.16;PF04444.9	Dioxygenase;; Catechol dioxygenase N terminus
Gglean002875.1	PF00096.21;PF13465.1;PF13894.1	Zinc finger, C2H2 type;; Zinc-finger double domain;; C2H2-type zinc finger
Gglean002876.1	PF00076.17;PF14259.1;PF13893.1	RNA recognition motif. (a.k.a. RRM, RBD, or RNP domain);; RNA recognition motif (a.k.a. RRM, RBD, or RNP domain);; RNA recognition motif. (a.k.a. RRM, RBD, or RNP domain)
Gglean002880.1	PF04811.10;PF04815.10;PF08033.7;PF04810.10	Sec23/Sec24 trunk domain;; Sec23/Sec24 helical domain;; Sec23/Sec24 beta-sandwich domain;; Sec23/Sec24 zinc finger
Gglean002882.1	PF09736.4	Pre-mRNA-splicing factor of RES complex
Gglean002883.1	PF00743.14;PF13738.1;PF07992.9;PF13434.1	Flavin-binding monooxygenase-like;; Pyridine nucleotide-disulphide oxidoreductase;; Pyridine nucleotide-disulphide oxidoreductase;; L-lysine 6-monooxygenase (NADPH-requiring)
Gglean002886.1	PF12937.2	F-box-like
Gglean002888.1	PF13378.1;PF01188.16;PF02746.11	Enolase C-terminal domain-like;; Mandelate racemase / muconate lactonizing enzyme, C-terminal domain;; Mandelate racemase / muconate lactonizing enzyme, N-terminal domain
Gglean002889.1	PF12814.2	Meiotic cell cortex C-terminal pleckstrin homology
Gglean002892.1	PF00233.14	3'5'-cyclic nucleotide phosphodiesterase
Gglean002896.1	PF00248.16	Aldo/keto reductase family
Gglean002911.1	PF12937.2	F-box-like
Gglean002914.1	PF00076.17;PF14259.1;PF13893.1;PF08777.6	RNA recognition motif. (a.k.a. RRM, RBD, or RNP domain);; RNA recognition motif (a.k.a. RRM, RBD, or RNP domain);; RNA recognition motif. (a.k.a. RRM, RBD, or RNP domain);; RNA binding motif
Gglean002915.1	PF08662.6;PF00076.17;PF14259.1;PF00400.27	Eukaryotic translation initiation factor eIF2A;; RNA recognition motif. (a.k.a. RRM, RBD, or RNP domain);; RNA recognition motif (a.k.a. RRM, RBD, or RNP domain);; WD domain, G-beta repeat
Gglean002922.1	PF02992.9	Transposase family tnp2
Gglean002926.1	PF04937.10	Protein of unknown function (DUF 659)
Gglean002928.1	PF00867.13;PF00752.12	XPG I-region;; XPG N-terminal domain
Gglean002937.1	PF00672.20	HAMP domain
Gglean002938.1	PF12851.2	Oxygenase domain of the 2OGFeDO superfamily
Gglean002939.1	PF08616.5	Stabilization of polarity axis
Gglean002946.1	PF00069.20;PF07714.12	Protein kinase domain;; Protein tyrosine kinase
Gglean002948.1	PF01191.14;PF03871.9	RNA polymerase Rpb5, C-terminal domain;; RNA polymerase Rpb5, N-terminal domain
Gglean002949.1	PF03936.11	Terpene synthase family, metal binding domain
Gglean002950.1	PF03936.11	Terpene synthase family, metal binding domain
Gglean002953.1	PF00106.20	short chain dehydrogenase
Gglean002954.1	PF03167.14	Uracil DNA glycosylase superfamily
Gglean002955.1	PF00098.18;PF13917.1;PF00013.24	Zinc knuckle;; Zinc knuckle;; KH domain
Gglean002956.1	PF01556.13;PF00684.14;PF00226.26	DnaJ C terminal domain;; DnaJ central domain;; DnaJ domain
Gglean002958.1	PF04116.8	Fatty acid hydroxylase superfamily
Gglean002960.1	PF00300.17	Histidine phosphatase superfamily (branch 1)
Gglean002961.1	PF04670.7	Gtr1/RagA G protein conserved region
Gglean002963.1	PF13911.1;PF08534.5;PF00578.16	AhpC/TSA antioxidant enzyme;; Redoxin;; AhpC/TSA family
Gglean002964.1	PF00400.27	WD domain, G-beta repeat
Gglean002968.1	PF00083.19;PF07690.11	Sugar (and other) transporter;; Major Facilitator Superfamily
Gglean002969.1	PF12796.2;PF13637.1;PF00023.25	Ankyrin repeats (3 copies);; Ankyrin repeats (many copies);; Ankyrin repeat
Gglean002970.1	PF00149.23;PF00650.15	Calcineurin-like phosphoesterase;; CRAL/TRIO domain
Gglean002976.1	PF00596.16	Class II Aldolase and Adducin N-terminal domain
Gglean002977.1	PF08520.5	Fungal protein of unknown function (DUF1748)
Gglean002978.1	PF03348.10	Serine incorporator (Serinc)
Gglean002979.1	PF06179.7	Surfeit locus protein 5 subunit 22 of Mediator complex
Gglean002980.1	PF00026.18	Eukaryotic aspartyl protease
Gglean002982.1	PF00010.21	Helix-loop-helix DNA-binding domain
Gglean002983.1	PF02036.12	SCP-2 sterol transfer family
Gglean002984.1	PF00701.17	Dihydrodipicolinate synthetase family
Gglean002986.1	PF00982.16	Glycosyltransferase family 20
Gglean002987.1	PF00982.16	Glycosyltransferase family 20
Gglean002988.1	PF08542.6;PF13177.1;PF00004.24;PF06144.8	Replication factor C C-terminal domain;; DNA polymerase III, delta subunit;; ATPase family associated with various cellular activities (AAA);; DNA polymerase III, delta subunit
Gglean002989.1	PF07016.6	Cysteine-rich acidic integral membrane protein precursor
Gglean002990.1	PF02535.17	ZIP Zinc transporter
Gglean002994.1	PF00466.15;PF00428.14	Ribosomal protein L10;; 60s Acidic ribosomal protein
Gglean002995.1	PF01370.16;PF01073.14;PF13460.1;PF07993.7;PF05368.8;PF00106.20	NAD dependent epimerase/dehydratase family;; 3-beta hydroxysteroid dehydrogenase/isomerase family;; NADH(P)-binding;; Male sterility protein;; NmrA-like family;; short chain dehydrogenase
Gglean002996.1	PF01370.16;PF01073.14;PF13460.1;PF07993.7;PF05368.8;PF00106.20	NAD dependent epimerase/dehydratase family;; 3-beta hydroxysteroid dehydrogenase/isomerase family;; NADH(P)-binding;; Male sterility protein;; NmrA-like family;; short chain dehydrogenase
Gglean002997.1	PF00026.18;PF13650.1	Eukaryotic aspartyl protease;; Aspartyl protease
Gglean003000.1	PF02926.12	THUMP domain
Gglean003001.1	PF01115.12	F-actin capping protein, beta subunit
Gglean003002.1	PF00160.16	Cyclophilin type peptidyl-prolyl cis-trans isomerase/CLD
Gglean003003.1	PF00160.16	Cyclophilin type peptidyl-prolyl cis-trans isomerase/CLD
Gglean003004.1	PF00248.16	Aldo/keto reductase family
Gglean003005.1	PF02515.12	CoA-transferase family III
Gglean003006.1	PF04082.13	Fungal specific transcription factor domain
Gglean003008.1	PF00520.26	Ion transport protein
Gglean003009.1	PF06293.9;PF01636.18;PF00069.20;PF02958.15	Lipopolysaccharide kinase (Kdo/WaaP) family;; Phosphotransferase enzyme family;; Protein kinase domain;; Ecdysteroid kinase
Gglean003013.1	PF15243.1	Anaphase-promoting complex subunit 15
Gglean003014.1	PF05721.8	Phytanoyl-CoA dioxygenase (PhyH)
Gglean003015.1	PF13489.1;PF08241.7	Methyltransferase domain;; Methyltransferase domain
Gglean003016.1	PF02128.10;PF07504.8	Fungalysin metallopeptidase (M36);; Fungalysin/Thermolysin Propeptide Motif
Gglean003017.1	PF00071.17;PF08477.8;PF00025.16;PF04670.7;PF01926.18;PF00009.22	Ras family;; Miro-like protein;; ADP-ribosylation factor family;; Gtr1/RagA G protein conserved region;; 50S ribosome-binding GTPase;; Elongation factor Tu GTP binding domain
Gglean003018.1	PF01569.16;PF14378.1	PAP2 superfamily;; PAP2 superfamily
Gglean003019.1	PF01553.16	Acyltransferase
Gglean003024.1	PF00326.16;PF12695.2;PF12697.2;PF01738.13;PF08386.5;PF07859.8	Prolyl oligopeptidase family;; Alpha/beta hydrolase family;; Alpha/beta hydrolase family;; Dienelactone hydrolase family;; TAP-like protein;; alpha/beta hydrolase fold
Gglean003026.1	PF01053.15;PF01041.12;PF00155.16;PF00266.14;PF01212.16	Cys/Met metabolism PLP-dependent enzyme;; DegT/DnrJ/EryC1/StrS aminotransferase family;; Aminotransferase class I and II;; Aminotransferase class-V;; Beta-eliminating lyase
Gglean003028.1	PF00400.27	WD domain, G-beta repeat
Gglean003032.1	PF11816.3;PF00400.27	Domain of unknown function (DUF3337);; WD domain, G-beta repeat
Gglean003036.1	PF01399.22	PCI domain
Gglean003037.1	PF00083.19;PF07690.11;PF13347.1	Sugar (and other) transporter;; Major Facilitator Superfamily;; MFS/sugar transport protein
Gglean003038.1	PF00561.15	alpha/beta hydrolase fold
Gglean003039.1	PF12697.2	Alpha/beta hydrolase family
Gglean003040.1	PF07738.8	Sad1 / UNC-like C-terminal
Gglean003041.1	PF00168.25	C2 domain
Gglean003042.1	PF00005.22;PF00664.18;PF13304.1;PF01926.18	ABC transporter;; ABC transporter transmembrane region;; AAA domain;; 50S ribosome-binding GTPase
Gglean003043.1	PF05368.8;PF13460.1;PF01370.16;PF01118.19;PF01073.14	NmrA-like family;; NADH(P)-binding;; NAD dependent epimerase/dehydratase family;; Semialdehyde dehydrogenase, NAD binding domain;; 3-beta hydroxysteroid dehydrogenase/isomerase family
Gglean003046.1	PF00400.27	WD domain, G-beta repeat
Gglean003047.1	PF00503.15;PF00025.16	G-protein alpha subunit;; ADP-ribosylation factor family
Gglean003053.1	PF07967.8	C3HC zinc finger-like
Gglean003054.1	PF08600.5	Rsm1-like
Gglean003055.1	PF10176.4	Protein of unknown function (DUF2370)
Gglean003057.1	PF00067.17	Cytochrome P450
Gglean003058.1	PF00067.17	Cytochrome P450
Gglean003059.1	PF01966.17	HD domain
Gglean003064.1	PF00350.18;PF01031.15	Dynamin family;; Dynamin central region
Gglean003066.1	PF02839.9	Carbohydrate binding domain
Gglean003069.1	PF00118.19	TCP-1/cpn60 chaperonin family
Gglean003070.1	PF01176.14	Translation initiation factor 1A / IF-1
Gglean003071.1	PF00069.20;PF07714.12;PF14531.1	Protein kinase domain;; Protein tyrosine kinase;; Kinase-like
Gglean003073.1	PF01370.16;PF13460.1;PF01073.14	NAD dependent epimerase/dehydratase family;; NADH(P)-binding;; 3-beta hydroxysteroid dehydrogenase/isomerase family
Gglean003075.1	PF01490.13	Transmembrane amino acid transporter protein
Gglean003076.1	PF09359.5;PF03105.14;PF02656.10	VTC domain;; SPX domain;; Domain of unknown function (DUF202)
Gglean003077.1	PF00400.27	WD domain, G-beta repeat
Gglean003078.1	PF01189.12	NOL1/NOP2/sun family
Gglean003079.1	PF04851.10;PF00176.18;PF00271.26;PF13625.1;PF00270.24	Type III restriction enzyme, res subunit;; SNF2 family N-terminal domain;; Helicase conserved C-terminal domain;; Helicase conserved C-terminal domain;; DEAD/DEAH box helicase
Gglean003080.1	PF00170.16	bZIP transcription factor
Gglean003081.1	PF01148.15	Cytidylyltransferase family
Gglean003082.1	PF00512.20;PF02518.21;PF01590.21;PF13492.1	His Kinase A (phospho-acceptor) domain;; Histidine kinase-, DNA gyrase B-, and HSP90-like ATPase;; GAF domain;; GAF domain
Gglean003083.1	PF01053.15;PF00288.21;PF10509.4	Cys/Met metabolism PLP-dependent enzyme;; GHMP kinases N terminal domain;; Galactokinase galactose-binding signature
Gglean003084.1	PF04438.11	HIT zinc finger
Gglean003086.1	PF00561.15;PF12697.2	alpha/beta hydrolase fold;; Alpha/beta hydrolase family
Gglean003087.1	PF00682.14	HMGL-like
Gglean003088.1	PF00400.27	WD domain, G-beta repeat
Gglean003089.1	PF03896.11	Translocon-associated protein (TRAP), alpha subunit
Gglean003090.1	PF00378.15	Enoyl-CoA hydratase/isomerase family
Gglean003091.1	PF00026.18	Eukaryotic aspartyl protease
Gglean003092.1	PF01853.13;PF00628.24	MOZ/SAS family;; PHD-finger
Gglean003096.1	PF06966.7	Protein of unknown function (DUF1295)
Gglean003097.1	PF13905.1;PF08534.5;PF00085.15;PF00578.16	Thioredoxin-like;; Redoxin;; Thioredoxin;; AhpC/TSA family
Gglean003099.1	PF01979.15;PF00449.15;PF00699.15;PF00547.13;PF13594.1	Amidohydrolase family;; Urease alpha-subunit, N-terminal domain;; Urease beta subunit;; Urease, gamma subunit;; Amidohydrolase
Gglean003100.1	PF07690.11	Major Facilitator Superfamily
Gglean003101.1	PF08243.6	SPT2 chromatin protein
Gglean003102.1	PF08219.6	Outer membrane protein TOM13
Gglean003104.1	PF00441.19;PF02770.14;PF00173.23;PF02771.11	Acyl-CoA dehydrogenase, C-terminal domain;; Acyl-CoA dehydrogenase, middle domain;; Cytochrome b5-like Heme/Steroid binding domain;; Acyl-CoA dehydrogenase, N-terminal domain
Gglean003105.1	PF00152.15	tRNA synthetases class II (D, K and N)
Gglean003108.1	PF05699.9	hAT family C-terminal dimerisation region
Gglean003110.1	PF01873.12	Domain found in IF2B/IF5
Gglean003112.1	PF04113.9	Gpi16 subunit, GPI transamidase component
Gglean003113.1	PF04113.9	Gpi16 subunit, GPI transamidase component
Gglean003114.1	PF12738.2	twin BRCT domain
Gglean003115.1	PF13813.1	Membrane bound O-acyl transferase family
Gglean003116.1	PF01217.15	Clathrin adaptor complex small chain
Gglean003118.1	PF01398.16;PF14464.1	JAB1/Mov34/MPN/PAD-1 ubiquitin protease;; Prokaryotic homologs of the JAB domain
Gglean003120.1	PF01226.12	Formate/nitrite transporter
Gglean003124.1	PF00366.15	Ribosomal protein S17
Gglean003125.1	PF01920.15	Prefoldin subunit
Gglean003134.1	PF10273.4	Pre-rRNA-processing protein TSR2
Gglean003135.1	PF00134.18;PF02984.14	Cyclin, N-terminal domain;; Cyclin, C-terminal domain
Gglean003137.1	PF01966.17	HD domain
Gglean003138.1	PF07690.11;PF00083.19	Major Facilitator Superfamily;; Sugar (and other) transporter
Gglean003141.1	PF00076.17;PF14259.1;PF13893.1	RNA recognition motif. (a.k.a. RRM, RBD, or RNP domain);; RNA recognition motif (a.k.a. RRM, RBD, or RNP domain);; RNA recognition motif. (a.k.a. RRM, RBD, or RNP domain)
Gglean003142.1	PF00004.24;PF13191.1;PF01695.12;PF07724.9	ATPase family associated with various cellular activities (AAA);; AAA ATPase domain;; IstB-like ATP binding protein;; AAA domain (Cdc48 subfamily)
Gglean003143.1	PF05183.7	RNA dependent RNA polymerase
Gglean003144.1	PF05834.7;PF00732.14	Lycopene cyclase protein;; GMC oxidoreductase
Gglean003145.1	PF00732.14;PF05199.8	GMC oxidoreductase;; GMC oxidoreductase
Gglean003152.1	PF05721.8	Phytanoyl-CoA dioxygenase (PhyH)
Gglean003155.1	PF01048.15	Phosphorylase superfamily
Gglean003156.1	PF12697.2	Alpha/beta hydrolase family
Gglean003157.1	PF13520.1;PF00324.16	Amino acid permease;; Amino acid permease
Gglean003160.1	PF03198.9;PF07983.8;PF00150.13	Glucanosyltransferase;; X8 domain;; Cellulase (glycosyl hydrolase family 5)
Gglean003161.1	PF12697.2;PF00561.15	Alpha/beta hydrolase family;; alpha/beta hydrolase fold
Gglean003162.1	PF00009.22;PF11987.3;PF03144.20;PF01926.18	Elongation factor Tu GTP binding domain;; Translation-initiation factor 2;; Elongation factor Tu domain 2;; 50S ribosome-binding GTPase
Gglean003163.1	PF00225.18;PF12473.3;PF00169.24;PF00498.21;PF12423.3	Kinesin motor domain;; Kinesin protein;; PH domain;; FHA domain;; Kinesin protein 1B
Gglean003165.1	PF01803.11	LIM-domain binding protein
Gglean003166.1	PF00505.14;PF09011.5	HMG (high mobility group) box;; HMG-box domain
Gglean003168.1	PF01370.16;PF01073.14;PF13460.1;PF13641.1;PF00535.21	NAD dependent epimerase/dehydratase family;; 3-beta hydroxysteroid dehydrogenase/isomerase family;; NADH(P)-binding;; Glycosyltransferase like family 2;; Glycosyl transferase family 2
Gglean003170.1	PF00176.18;PF00271.26;PF04851.10;PF00097.20	SNF2 family N-terminal domain;; Helicase conserved C-terminal domain;; Type III restriction enzyme, res subunit;; Zinc finger, C3HC4 type (RING finger)
Gglean003174.1	PF00383.17	Cytidine and deoxycytidylate deaminase zinc-binding region
Gglean003175.1	PF02897.10;PF00326.16	Prolyl oligopeptidase, N-terminal beta-propeller domain;; Prolyl oligopeptidase family
Gglean003177.1	PF00707.17	Translation initiation factor IF-3, C-terminal domain
Gglean003178.1	PF09088.6;PF09090.6;PF02854.14	MIF4G like;; MIF4G like;; MIF4G domain
Gglean003180.1	PF03947.13;PF00181.18	Ribosomal Proteins L2, C-terminal domain;; Ribosomal Proteins L2, RNA binding domain
Gglean003181.1	PF12999.2;PF13015.1;PF07915.8	Glucosidase II beta subunit-like;; Glucosidase II beta subunit-like protein;; Glucosidase II beta subunit-like protein
Gglean003182.1	PF02992.9	Transposase family tnp2
Gglean003187.1	PF00078.22;PF03372.18	Reverse transcriptase (RNA-dependent DNA polymerase);; Endonuclease/Exonuclease/phosphatase family
Gglean003189.1	PF08613.6	Cyclin
Gglean003190.1	PF13738.1;PF00743.14;PF13450.1;PF13434.1;PF07992.9	Pyridine nucleotide-disulphide oxidoreductase;; Flavin-binding monooxygenase-like;; NAD(P)-binding Rossmann-like domain;; L-lysine 6-monooxygenase (NADPH-requiring);; Pyridine nucleotide-disulphide oxidoreductase
Gglean003193.1	PF00400.27;PF08662.6	WD domain, G-beta repeat;; Eukaryotic translation initiation factor eIF2A
Gglean003195.1	PF00828.14;PF08174.6	Ribosomal protein L18e/L15;; Cell division protein anillin
Gglean003196.1	PF00349.16	Hexokinase
Gglean003197.1	PF03727.11;PF00349.16	Hexokinase;; Hexokinase
Gglean003199.1	PF00394.17;PF07731.9	Multicopper oxidase;; Multicopper oxidase
Gglean003200.1	PF01693.11	Caulimovirus viroplasmin
Gglean003205.1	PF11786.3;PF00170.16;PF11785.3;PF07716.10	Aft1 HRA domain;; bZIP transcription factor;; Aft1 osmotic stress response (OSM) domain;; Basic region leucine zipper
Gglean003208.1	PF00636.21;PF14622.1;PF03368.9	Ribonuclease III domain;; Ribonuclease-III-like;; Dicer dimerisation domain
Gglean003209.1	PF00023.25;PF12796.2;PF13637.1;PF13857.1;PF13606.1	Ankyrin repeat;; Ankyrin repeats (3 copies);; Ankyrin repeats (many copies);; Ankyrin repeats (many copies);; Ankyrin repeat
Gglean003210.1	PF14671.1;PF00782.15;PF00102.22	Dual specificity protein phosphatase, N-terminal half;; Dual specificity phosphatase, catalytic domain;; Protein-tyrosine phosphatase
Gglean003212.1	PF00542.14	Ribosomal protein L7/L12 C-terminal domain
Gglean003213.1	PF00018.23;PF14604.1;PF07653.12;PF00787.19	SH3 domain;; Variant SH3 domain;; Variant SH3 domain;; PX domain
Gglean003214.1	PF02187.12	Growth-Arrest-Specific Protein 2 Domain
Gglean003218.1	PF12937.2	F-box-like
Gglean003219.1	PF00069.20;PF07714.12	Protein kinase domain;; Protein tyrosine kinase
Gglean003221.1	PF00106.20;PF08659.5	short chain dehydrogenase;; KR domain
Gglean003222.1	PF04722.8	Ssu72-like protein
Gglean003223.1	PF00578.16;PF08534.5;PF10417.4	AhpC/TSA family;; Redoxin;; C-terminal domain of 1-Cys peroxiredoxin
Gglean003224.1	PF00227.21;PF10584.4	Proteasome subunit;; Proteasome subunit A N-terminal signature
Gglean003225.1	PF00172.13	Fungal Zn(2)-Cys(6) binuclear cluster domain
Gglean003227.1	PF00227.21;PF10584.4	Proteasome subunit;; Proteasome subunit A N-terminal signature
Gglean003228.1	PF01722.13	BolA-like protein
Gglean003229.1	PF00013.24	KH domain
Gglean003231.1	PF10294.4	Putative methyltransferase
Gglean003232.1	PF09816.4	RNA polymerase II transcription elongation factor
Gglean003234.1	PF01798.13;PF08060.8;PF08156.8	Putative snoRNA binding domain;; NOSIC (NUC001) domain;; NOP5NT (NUC127) domain
Gglean003235.1	PF00069.20	Protein kinase domain
Gglean003236.1	PF00806.14	Pumilio-family RNA binding repeat
Gglean003237.1	PF13414.1;PF00515.23;PF07719.12;PF13432.1;PF13424.1;PF14559.1;PF13428.1;PF13176.1;PF13431.1;PF13181.1;PF13371.1;PF12895.2	TPR repeat;; Tetratricopeptide repeat;; Tetratricopeptide repeat;; Tetratricopeptide repeat;; Tetratricopeptide repeat;; Tetratricopeptide repeat;; Tetratricopeptide repeat;; Tetratricopeptide repeat;; Tetratricopeptide repeat;; Tetratricopeptide repeat;; Tetratricopeptide repeat;; Anaphase-promoting complex, cyclosome, subunit 3
Gglean003242.1	PF10454.4	Protein of unknown function (DUF2458)
Gglean003243.1	PF12697.2	Alpha/beta hydrolase family
Gglean003244.1	PF05291.6	Bystin
Gglean003246.1	PF02109.11	DAD family
Gglean003249.1	PF00069.20;PF07714.12	Protein kinase domain;; Protein tyrosine kinase
Gglean003250.1	PF00069.20	Protein kinase domain
Gglean003251.1	PF00069.20	Protein kinase domain
Gglean003255.1	PF04082.13	Fungal specific transcription factor domain
Gglean003256.1	PF00857.15	Isochorismatase family
Gglean003257.1	PF02777.13	Iron/manganese superoxide dismutases, C-terminal domain
Gglean003258.1	PF01370.16;PF04321.12;PF01073.14;PF07993.7;PF02719.10;PF13460.1	NAD dependent epimerase/dehydratase family;; RmlD substrate binding domain;; 3-beta hydroxysteroid dehydrogenase/isomerase family;; Male sterility protein;; Polysaccharide biosynthesis protein;; NADH(P)-binding
Gglean003259.1	PF00615.14;PF00610.16	Regulator of G protein signaling domain;; Domain found in Dishevelled, Egl-10, and Pleckstrin (DEP)
Gglean003261.1	PF11715.3	Nucleoporin Nup120/160
Gglean003262.1	PF00248.16	Aldo/keto reductase family
Gglean003264.1	PF01171.15	PP-loop family
Gglean003267.1	PF00450.17	Serine carboxypeptidase
Gglean003268.1	PF00450.17	Serine carboxypeptidase
Gglean003270.1	PF13668.1	Ferritin-like domain
Gglean003273.1	PF07993.7;PF00501.23;PF01370.16;PF00550.20	Male sterility protein;; AMP-binding enzyme;; NAD dependent epimerase/dehydratase family;; Phosphopantetheine attachment site
Gglean003275.1	PF02628.10	Cytochrome oxidase assembly protein
Gglean003276.1	PF00171.17	Aldehyde dehydrogenase family
Gglean003277.1	PF12937.2	F-box-like
Gglean003279.1	PF08636.5	ER protein Pkr1
Gglean003281.1	PF09734.4	RNA polymerase III transcription factor (TF)IIIC subunit
Gglean003282.1	PF00330.15;PF00694.14	Aconitase family (aconitate hydratase);; Aconitase C-terminal domain
Gglean003284.1	PF04065.10;PF04153.13	Not1 N-terminal domain, CCR4-Not complex component;; NOT2 / NOT3 / NOT5 family
Gglean003285.1	PF01208.12	Uroporphyrinogen decarboxylase (URO-D)
Gglean003288.1	PF07690.11	Major Facilitator Superfamily
Gglean003290.1	PF00394.17;PF07732.10;PF07731.9	Multicopper oxidase;; Multicopper oxidase;; Multicopper oxidase
Gglean003291.1	PF11785.3	Aft1 osmotic stress response (OSM) domain
Gglean003296.1	PF00076.17;PF13893.1;PF14259.1	RNA recognition motif. (a.k.a. RRM, RBD, or RNP domain);; RNA recognition motif. (a.k.a. RRM, RBD, or RNP domain);; RNA recognition motif (a.k.a. RRM, RBD, or RNP domain)
Gglean003297.1	PF08701.6;PF01926.18;PF03193.11;PF04548.11;PF02421.13;PF00009.22	GNL3L/Grn1 putative GTPase;; 50S ribosome-binding GTPase;; Protein of unknown function, DUF258;; AIG1 family;; Ferrous iron transport protein B;; Elongation factor Tu GTP binding domain
Gglean003298.1	PF14572.1	Phosphoribosyl synthetase-associated domain
Gglean003299.1	PF10521.4	Protein of unknown function (DUF2454)
Gglean003301.1	PF11927.3	Protein of unknown function (DUF3445)
Gglean003308.1	PF02782.11;PF00370.16	FGGY family of carbohydrate kinases, C-terminal domain;; FGGY family of carbohydrate kinases, N-terminal domain
Gglean003310.1	PF14604.1;PF00018.23;PF07653.12	Variant SH3 domain;; SH3 domain;; Variant SH3 domain
Gglean003311.1	PF08613.6;PF00134.18	Cyclin;; Cyclin, N-terminal domain
Gglean003312.1	PF08449.6	UAA transporter family
Gglean003314.1	PF00153.22	Mitochondrial carrier protein
Gglean003315.1	PF00153.22	Mitochondrial carrier protein
Gglean003316.1	PF00441.19;PF02770.14;PF00173.23;PF02771.11;PF08028.6	Acyl-CoA dehydrogenase, C-terminal domain;; Acyl-CoA dehydrogenase, middle domain;; Cytochrome b5-like Heme/Steroid binding domain;; Acyl-CoA dehydrogenase, N-terminal domain;; Acyl-CoA dehydrogenase, C-terminal domain
Gglean003317.1	PF00271.26	Helicase conserved C-terminal domain
Gglean003319.1	PF04191.8;PF04140.9;PF01222.12	Phospholipid methyltransferase;; Isoprenylcysteine carboxyl methyltransferase (ICMT) family;; Ergosterol biosynthesis ERG4/ERG24 family
Gglean003320.1	PF01501.15;PF13578.1	Glycosyl transferase family 8;; Methyltransferase domain
Gglean003321.1	PF08711.6	TFIIS helical bundle-like domain
Gglean003323.1	PF00163.14;PF01479.20	Ribosomal protein S4/S9 N-terminal domain;; S4 domain
Gglean003325.1	PF00025.16;PF00503.15;PF09439.5;PF04670.7;PF01926.18;PF00071.17;PF08477.8;PF00009.22	ADP-ribosylation factor family;; G-protein alpha subunit;; Signal recognition particle receptor beta subunit;; Gtr1/RagA G protein conserved region;; 50S ribosome-binding GTPase;; Ras family;; Miro-like protein;; Elongation factor Tu GTP binding domain
Gglean003326.1	PF00478.20;PF00571.23;PF01070.13;PF03060.10;PF05690.9	IMP dehydrogenase / GMP reductase domain;; CBS domain;; FMN-dependent dehydrogenase;; Nitronate monooxygenase;; Thiazole biosynthesis protein ThiG
Gglean003327.1	PF00328.17	Histidine phosphatase superfamily (branch 2)
Gglean003328.1	PF05199.8;PF00732.14	GMC oxidoreductase;; GMC oxidoreductase
Gglean003329.1	PF00557.19;PF05195.11	Metallopeptidase family M24;; Aminopeptidase P, N-terminal domain
Gglean003330.1	PF00153.22	Mitochondrial carrier protein
Gglean003334.1	PF08519.7;PF00533.21;PF00004.24;PF03215.10	Replication factor RFC1 C terminal domain;; BRCA1 C Terminus (BRCT) domain;; ATPase family associated with various cellular activities (AAA);; Rad17 cell cycle checkpoint protein
Gglean003335.1	PF00026.18;PF14541.1	Eukaryotic aspartyl protease;; Xylanase inhibitor C-terminal
Gglean003336.1	PF05843.9;PF13428.1;PF14559.1	Suppressor of forked protein (Suf);; Tetratricopeptide repeat;; Tetratricopeptide repeat
Gglean003338.1	PF03644.8	Glycosyl hydrolase family 85
Gglean003340.1	PF01174.14;PF07685.9;PF03575.12	SNO glutamine amidotransferase family;; CobB/CobQ-like glutamine amidotransferase domain;; Peptidase family S51
Gglean003341.1	PF00450.17	Serine carboxypeptidase
Gglean003342.1	PF00450.17	Serine carboxypeptidase
Gglean003344.1	PF00106.20	short chain dehydrogenase
Gglean003346.1	PF07690.11	Major Facilitator Superfamily
Gglean003352.1	PF03372.18	Endonuclease/Exonuclease/phosphatase family
Gglean003354.1	PF04910.9	Transcriptional repressor TCF25
Gglean003355.1	PF07690.11	Major Facilitator Superfamily
Gglean003357.1	PF02866.13;PF00056.18	lactate/malate dehydrogenase, alpha/beta C-terminal domain;; lactate/malate dehydrogenase, NAD binding domain
Gglean003358.1	PF06807.9;PF03205.9	Pre-mRNA cleavage complex II protein Clp1;; Molybdopterin guanine dinucleotide synthesis protein B
Gglean003359.1	PF00270.24	DEAD/DEAH box helicase
Gglean003360.1	PF00069.20;PF01636.18;PF06293.9	Protein kinase domain;; Phosphotransferase enzyme family;; Lipopolysaccharide kinase (Kdo/WaaP) family
Gglean003366.1	PF13905.1;PF00085.15;PF08534.5	Thioredoxin-like;; Thioredoxin;; Redoxin
Gglean003367.1	PF07690.11	Major Facilitator Superfamily
Gglean003369.1	PF03834.9;PF14520.1	Binding domain of DNA repair protein Ercc1 (rad10/Swi10);; Helix-hairpin-helix domain
Gglean003371.1	PF01425.16	Amidase
Gglean003380.1	PF01399.22	PCI domain
Gglean003382.1	PF00155.16;PF01041.12	Aminotransferase class I and II;; DegT/DnrJ/EryC1/StrS aminotransferase family
Gglean003383.1	PF00709.16	Adenylosuccinate synthetase
Gglean003385.1	PF13920.1	Zinc finger, C3HC4 type (RING finger)
Gglean003390.1	PF00069.20	Protein kinase domain
Gglean003392.1	PF02992.9;PF13960.1	Transposase family tnp2;; Domain of unknown function (DUF4218)
Gglean003393.1	PF00722.16	Glycosyl hydrolases family 16
Gglean003394.1	PF00722.16	Glycosyl hydrolases family 16
Gglean003396.1	PF00505.14;PF09011.5	HMG (high mobility group) box;; HMG-box domain
Gglean003397.1	PF00514.18;PF13646.1;PF02985.17;PF13513.1;PF01602.15;PF04826.8;PF05804.7;PF03224.9	Armadillo/beta-catenin-like repeat;; HEAT repeats;; HEAT repeat;; HEAT-like repeat;; Adaptin N terminal region;; Armadillo-like;; Kinesin-associated protein (KAP);; V-ATPase subunit H
Gglean003399.1	PF00067.17	Cytochrome P450
Gglean003400.1	PF00069.20;PF07714.12	Protein kinase domain;; Protein tyrosine kinase
Gglean003402.1	PF00271.26	Helicase conserved C-terminal domain
Gglean003403.1	PF00505.14;PF09011.5	HMG (high mobility group) box;; HMG-box domain
Gglean003404.1	PF00069.20;PF07714.12	Protein kinase domain;; Protein tyrosine kinase
Gglean003406.1	PF00153.22	Mitochondrial carrier protein
Gglean003407.1	PF00153.22	Mitochondrial carrier protein
Gglean003411.1	PF03099.14	Biotin/lipoate A/B protein ligase family
Gglean003412.1	PF00722.16	Glycosyl hydrolases family 16
Gglean003413.1	PF13460.1;PF05368.8;PF01370.16	NADH(P)-binding;; NmrA-like family;; NAD dependent epimerase/dehydratase family
Gglean003414.1	PF13460.1;PF05368.8;PF01370.16;PF01073.14;PF02254.13	NADH(P)-binding;; NmrA-like family;; NAD dependent epimerase/dehydratase family;; 3-beta hydroxysteroid dehydrogenase/isomerase family;; TrkA-N domain
Gglean003415.1	PF06726.7	Bladder cancer-related protein BC10
Gglean003416.1	PF00400.27;PF11715.3	WD domain, G-beta repeat;; Nucleoporin Nup120/160
Gglean003417.1	PF06644.6	ATP11 protein
Gglean003418.1	PF05047.11	Mitochondrial ribosomal protein L51 / S25 / CI-B8 domain
Gglean003420.1	PF04757.9;PF00097.20	Pex2 / Pex12 amino terminal region;; Zinc finger, C3HC4 type (RING finger)
Gglean003421.1	PF03028.10;PF08393.8;PF12774.2;PF12781.2;PF12780.2;PF12777.2;PF07728.9;PF12775.2;PF00004.24;PF13401.1;PF13671.1;PF13207.1;PF13191.1;PF13238.1;PF00437.15;PF13245.1;PF01078.16;PF01580.13	Dynein heavy chain and region D6 of dynein motor;; Dynein heavy chain, N-terminal region 2;; Hydrolytic ATP binding site of dynein motor region D1;; ATP-binding dynein motor region D5;; P-loop containing dynein motor region D4;; Microtubule-binding stalk of dynein motor;; AAA domain (dynein-related subfamily);; P-loop containing dynein motor region D3;; ATPase family associated with various cellu…
Gglean003423.1	PF07690.11;PF06609.8;PF00083.19	Major Facilitator Superfamily;; Fungal trichothecene efflux pump (TRI12);; Sugar (and other) transporter
Gglean003426.1	PF00909.16	Ammonium Transporter Family
Gglean003430.1	PF04031.8	Las1-like
Gglean003432.1	PF00293.23	NUDIX domain
Gglean003433.1	PF00069.20;PF07714.12	Protein kinase domain;; Protein tyrosine kinase
Gglean003436.1	PF00076.17;PF14259.1;PF13893.1;PF00098.18	RNA recognition motif. (a.k.a. RRM, RBD, or RNP domain);; RNA recognition motif (a.k.a. RRM, RBD, or RNP domain);; RNA recognition motif. (a.k.a. RRM, RBD, or RNP domain);; Zinc knuckle
Gglean003437.1	PF05021.10;PF05020.10;PF11543.3	NPL4 family;; NPL4 family, putative zinc binding region;; Nuclear pore localisation protein NPL4
Gglean003438.1	PF00620.22;PF00611.18	RhoGAP domain;; Fes/CIP4, and EFC/F-BAR homology domain
Gglean003439.1	PF00106.20;PF08659.5;PF01370.16	short chain dehydrogenase;; KR domain;; NAD dependent epimerase/dehydratase family
Gglean003440.1	PF01612.15	3'-5' exonuclease
Gglean003441.1	PF08606.6;PF00400.27;PF04564.10;PF11789.3	Prp19/Pso4-like;; WD domain, G-beta repeat;; U-box domain;; Zinc-finger of the MIZ type in Nse subunit
Gglean003442.1	PF02668.11	Taurine catabolism dioxygenase TauD, TfdA family
Gglean003443.1	PF04922.7	DIE2/ALG10 family
Gglean003445.1	PF00225.18	Kinesin motor domain
Gglean003447.1	PF00153.22	Mitochondrial carrier protein
Gglean003448.1	PF00400.27	WD domain, G-beta repeat
Gglean003449.1	PF00493.18;PF14551.1;PF01078.16	MCM2/3/5 family;; MCM N-terminal domain;; Magnesium chelatase, subunit ChlI
Gglean003450.1	PF06472.10;PF00005.22	ABC transporter transmembrane region 2;; ABC transporter
Gglean003451.1	PF04707.9	PRELI-like family
Gglean003452.1	PF04182.7	B-block binding subunit of TFIIIC
Gglean003454.1	PF02824.16;PF01926.18	TGS domain;; 50S ribosome-binding GTPase
Gglean003455.1	PF12706.2;PF00753.22	Beta-lactamase superfamily domain;; Metallo-beta-lactamase superfamily
Gglean003456.1	PF04707.9	PRELI-like family
Gglean003458.1	PF07064.8	RIC1
Gglean003460.1	PF06687.7	SUR7/PalI family
Gglean003461.1	PF03198.9;PF07983.8	Glucanosyltransferase;; X8 domain
Gglean003462.1	PF14580.1;PF12799.2;PF13855.1	Leucine-rich repeat;; Leucine Rich repeats (2 copies);; Leucine rich repeat
Gglean003463.1	PF00493.18;PF14551.1;PF13012.1;PF01398.16;PF01078.16;PF07728.9	MCM2/3/5 family;; MCM N-terminal domain;; Maintenance of mitochondrial structure and function;; JAB1/Mov34/MPN/PAD-1 ubiquitin protease;; Magnesium chelatase, subunit ChlI;; AAA domain (dynein-related subfamily)
Gglean003465.1	PF04900.7	Fcf1
Gglean003466.1	PF10075.4;PF03399.11	COP9 signalosome, subunit CSN8;; SAC3/GANP/Nin1/mts3/eIF-3 p25 family
Gglean003467.1	PF01408.17	Oxidoreductase family, NAD-binding Rossmann fold
Gglean003468.1	PF05347.10;PF13232.1	Complex 1 protein (LYR family);; Complex1_LYR-like
Gglean003469.1	PF05183.7	RNA dependent RNA polymerase
Gglean003470.1	PF06732.6;PF00533.21	Pescadillo N-terminus;; BRCA1 C Terminus (BRCT) domain
Gglean003471.1	PF01369.15	Sec7 domain
Gglean003472.1	PF15410.1;PF00169.24;PF01369.15	Pleckstrin homology domain;; PH domain;; Sec7 domain
Gglean003474.1	PF10346.4	Conidiation protein 6
Gglean003476.1	PF14259.1;PF00076.17	RNA recognition motif (a.k.a. RRM, RBD, or RNP domain);; RNA recognition motif. (a.k.a. RRM, RBD, or RNP domain)
Gglean003482.1	PF00999.16	Sodium/hydrogen exchanger family
Gglean003485.1	PF00850.14	Histone deacetylase domain
Gglean003486.1	PF12928.2	tRNA-splicing endonuclease subunit sen54 N-term
Gglean003487.1	PF00026.18	Eukaryotic aspartyl protease
Gglean003492.1	PF12231.3	Rap1-interacting factor 1 N terminal
Gglean003493.1	PF02463.14;PF13476.1	RecF/RecN/SMC N terminal domain;; AAA domain
Gglean003494.1	PF01593.19	Flavin containing amine oxidoreductase
Gglean003495.1	PF12550.3	Transcriptional activator of glycolytic enzymes
Gglean003497.1	PF03935.10	Beta-glucan synthesis-associated protein (SKN1)
Gglean003498.1	PF02969.12;PF07571.8;PF00125.19	TATA box binding protein associated factor (TAF);; Protein of unknown function (DUF1546);; Core histone H2A/H2B/H3/H4
Gglean003499.1	PF02353.15;PF12847.2	Mycolic acid cyclopropane synthetase;; Methyltransferase domain
Gglean003505.1	PF06424.7;PF13428.1;PF13432.1	PRP1 splicing factor, N-terminal;; Tetratricopeptide repeat;; Tetratricopeptide repeat
Gglean003506.1	PF13428.1;PF13432.1;PF14559.1;PF07719.12;PF13414.1;PF13174.1;PF00515.23;PF13181.1;PF13431.1;PF02259.18	Tetratricopeptide repeat;; Tetratricopeptide repeat;; Tetratricopeptide repeat;; Tetratricopeptide repeat;; TPR repeat;; Tetratricopeptide repeat;; Tetratricopeptide repeat;; Tetratricopeptide repeat;; Tetratricopeptide repeat;; FAT domain
Gglean003508.1	PF00153.22	Mitochondrial carrier protein
Gglean003509.1	PF13639.1	Ring finger domain
Gglean003510.1	PF02463.14	RecF/RecN/SMC N terminal domain
Gglean003512.1	PF00083.19;PF07690.11	Sugar (and other) transporter;; Major Facilitator Superfamily
Gglean003518.1	PF00254.23	FKBP-type peptidyl-prolyl cis-trans isomerase
Gglean003520.1	PF13450.1;PF01593.19	NAD(P)-binding Rossmann-like domain;; Flavin containing amine oxidoreductase
Gglean003523.1	PF00752.12	XPG N-terminal domain
Gglean003524.1	PF13417.1;PF13409.1;PF13410.1;PF00043.20	Glutathione S-transferase, N-terminal domain;; Glutathione S-transferase, N-terminal domain;; Glutathione S-transferase, C-terminal domain;; Glutathione S-transferase, C-terminal domain
Gglean003525.1	PF00270.24	DEAD/DEAH box helicase
Gglean003527.1	PF00122.15;PF00690.21	E1-E2 ATPase;; Cation transporter/ATPase, N-terminus
Gglean003528.1	PF00412.17	LIM domain
Gglean003530.1	PF01423.17	LSM domain
Gglean003532.1	PF00134.18;PF02984.14	Cyclin, N-terminal domain;; Cyclin, C-terminal domain
Gglean003534.1	PF10537.4;PF02791.12;PF15612.1;PF15613.1;PF15614.1	ATP-utilising chromatin assembly and remodelling N-terminal;; DDT domain;; WSTF, HB1, Itc1p, MBD9 motif 1;; WSTF, HB1, Itc1p, MBD9 motif 2;; WSTF, HB1, Itc1p, MBD9 motif 3
Gglean003535.1	PF00400.27;PF08662.6;PF11715.3	WD domain, G-beta repeat;; Eukaryotic translation initiation factor eIF2A;; Nucleoporin Nup120/160
Gglean003536.1	PF00240.18;PF11976.3;PF14560.1;PF13019.1;PF10302.4;PF13881.1;PF11069.3;PF13860.1;PF11470.3	Ubiquitin family;; Ubiquitin-2 like Rad60 SUMO-like;; Ubiquitin-like domain;; Telomere stability and silencing;; DUF2407 ubiquitin-like domain;; Ubiquitin-2 like Rad60 SUMO-like;; Protein of unknown function (DUF2870);; FlgD Ig-like domain;; GLUT4 regulating protein TUG
Gglean003537.1	PF09430.5	Protein of unknown function (DUF2012)
Gglean003538.1	PF03169.10	OPT oligopeptide transporter protein
Gglean003539.1	PF13664.1	Domain of unknown function (DUF4149)
Gglean003540.1	PF14580.1	Leucine-rich repeat
Gglean003541.1	PF02383.13	SacI homology domain
Gglean003542.1	PF00956.13	Nucleosome assembly protein (NAP)
Gglean003543.1	PF01522.16	Polysaccharide deacetylase
Gglean003544.1	PF03033.15;PF02893.15;PF00169.24;PF00201.13	Glycosyltransferase family 28 N-terminal domain;; GRAM domain;; PH domain;; UDP-glucoronosyl and UDP-glucosyl transferase
Gglean003545.1	PF00069.20;PF07714.12;PF14531.1	Protein kinase domain;; Protein tyrosine kinase;; Kinase-like
Gglean003546.1	PF06941.7	5' nucleotidase, deoxy (Pyrimidine), cytosolic type C protein (NT5C)
Gglean003547.1	PF04437.8	RINT-1 / TIP-1 family
Gglean003549.1	PF01490.13	Transmembrane amino acid transporter protein
Gglean003550.1	PF00168.25	C2 domain
Gglean003551.1	PF08317.6	Spc7 kinetochore protein
Gglean003552.1	PF03169.10	OPT oligopeptide transporter protein
Gglean003553.1	PF13414.1;PF00515.23;PF07719.12;PF13431.1;PF13181.1;PF13428.1;PF13432.1;PF13176.1;PF14559.1;PF13371.1	TPR repeat;; Tetratricopeptide repeat;; Tetratricopeptide repeat;; Tetratricopeptide repeat;; Tetratricopeptide repeat;; Tetratricopeptide repeat;; Tetratricopeptide repeat;; Tetratricopeptide repeat;; Tetratricopeptide repeat;; Tetratricopeptide repeat
Gglean003554.1	PF00106.20;PF08659.5;PF01370.16	short chain dehydrogenase;; KR domain;; NAD dependent epimerase/dehydratase family
Gglean003555.1	PF05970.9;PF01693.11;PF13604.1;PF02689.9	PIF1-like helicase;; Caulimovirus viroplasmin;; AAA domain;; Helicase
Gglean003556.1	PF00664.18;PF00005.22;PF13304.1	ABC transporter transmembrane region;; ABC transporter;; AAA domain
Gglean003557.1	PF00005.22;PF00664.18	ABC transporter;; ABC transporter transmembrane region
Gglean003558.1	PF07716.10;PF00170.16	Basic region leucine zipper;; bZIP transcription factor
Gglean003560.1	PF03009.12	Glycerophosphoryl diester phosphodiesterase family
Gglean003561.1	PF02921.9;PF00355.21	Ubiquinol cytochrome reductase transmembrane region;; Rieske [2Fe-2S] domain
Gglean003562.1	PF00069.20;PF07714.12	Protein kinase domain;; Protein tyrosine kinase
Gglean003565.1	PF01738.13	Dienelactone hydrolase family
Gglean003566.1	PF13414.1;PF07719.12;PF00515.23;PF13431.1	TPR repeat;; Tetratricopeptide repeat;; Tetratricopeptide repeat;; Tetratricopeptide repeat
Gglean003568.1	PF00288.21	GHMP kinases N terminal domain
Gglean003571.1	PF01423.17	LSM domain
Gglean003573.1	PF04969.11	CS domain
Gglean003576.1	PF00849.17	RNA pseudouridylate synthase
Gglean003579.1	PF02803.13;PF00108.18;PF08545.5	Thiolase, C-terminal domain;; Thiolase, N-terminal domain;; 3-Oxoacyl-[acyl-carrier-protein (ACP)] synthase III
Gglean003581.1	PF00270.24;PF04851.10	DEAD/DEAH box helicase;; Type III restriction enzyme, res subunit
Gglean003582.1	PF00271.26	Helicase conserved C-terminal domain
Gglean003583.1	PF02518.21;PF00072.19;PF13191.1;PF00512.20;PF13185.1;PF00069.20;PF13492.1;PF01590.21;PF07714.12	Histidine kinase-, DNA gyrase B-, and HSP90-like ATPase;; Response regulator receiver domain;; AAA ATPase domain;; His Kinase A (phospho-acceptor) domain;; GAF domain;; Protein kinase domain;; GAF domain;; GAF domain;; Protein tyrosine kinase
Gglean003584.1	PF01149.19;PF06831.9	Formamidopyrimidine-DNA glycosylase N-terminal domain;; Formamidopyrimidine-DNA glycosylase H2TH domain
Gglean003586.1	PF01743.15	Poly A polymerase head domain
Gglean003592.1	PF00075.19	RNase H
Gglean003593.1	PF04140.9;PF04191.8	Isoprenylcysteine carboxyl methyltransferase (ICMT) family;; Phospholipid methyltransferase
Gglean003594.1	PF10236.4	Mitochondrial ribosomal death-associated protein 3
Gglean003595.1	PF10263.4	SprT-like family
Gglean003597.1	PF00075.19;PF01693.11	RNase H;; Caulimovirus viroplasmin
Gglean003598.1	PF01261.19	Xylose isomerase-like TIM barrel
Gglean003600.1	PF14138.1	Cytochrome c oxidase assembly protein COX16
Gglean003601.1	PF10602.4;PF01399.22	26S proteasome subunit RPN7;; PCI domain
Gglean003602.1	PF02992.9	Transposase family tnp2
Gglean003605.1	PF10522.4	RII binding domain
Gglean003609.1	PF00589.17	Phage integrase family
Gglean003610.1	PF13432.1	Tetratricopeptide repeat
Gglean003612.1	PF10522.4	RII binding domain
Gglean003616.1	PF14226.1	non-haem dioxygenase in morphine synthesis N-terminal
Gglean003617.1	PF03171.15	2OG-Fe(II) oxygenase superfamily
Gglean003618.1	PF01231.13	Indoleamine 2,3-dioxygenase
Gglean003629.1	PF07491.6	Protein phosphatase inhibitor
Gglean003630.1	PF08202.6	Mis12-Mtw1 protein family
Gglean003634.1	PF11702.3;PF08550.5	Protein of unknown function (DUF3295);; Fungal protein of unknown function (DUF1752)
Gglean003638.1	PF12799.2;PF00560.28;PF13855.1;PF13516.1;PF13504.1	Leucine Rich repeats (2 copies);; Leucine Rich Repeat;; Leucine rich repeat;; Leucine Rich repeat;; Leucine rich repeat
Gglean003640.1	PF13894.1;PF00096.21	C2H2-type zinc finger;; Zinc finger, C2H2 type
Gglean003641.1	PF06090.7	Inositol-pentakisphosphate 2-kinase
Gglean003642.1	PF00491.16	Arginase family
Gglean003644.1	PF08656.5	DASH complex subunit Dad3
Gglean003646.1	PF01171.15	PP-loop family
Gglean003647.1	PF05022.7	SRP40, C-terminal domain
Gglean003649.1	PF00006.20;PF00306.22;PF02874.18	ATP synthase alpha/beta family, nucleotide-binding domain;; ATP synthase alpha/beta chain, C terminal domain;; ATP synthase alpha/beta family, beta-barrel domain
Gglean003651.1	PF00160.16;PF05699.9	Cyclophilin type peptidyl-prolyl cis-trans isomerase/CLD;; hAT family C-terminal dimerisation region
Gglean003653.1	PF00083.19;PF07690.11	Sugar (and other) transporter;; Major Facilitator Superfamily
Gglean003654.1	PF01207.12	Dihydrouridine synthase (Dus)
Gglean003655.1	PF03949.10;PF00390.14	Malic enzyme, NAD binding domain;; Malic enzyme, N-terminal domain
Gglean003657.1	PF00390.14;PF03949.10	Malic enzyme, N-terminal domain;; Malic enzyme, NAD binding domain
Gglean003658.1	PF03949.10	Malic enzyme, NAD binding domain
Gglean003659.1	PF00076.17;PF14259.1;PF13893.1	RNA recognition motif. (a.k.a. RRM, RBD, or RNP domain);; RNA recognition motif (a.k.a. RRM, RBD, or RNP domain);; RNA recognition motif. (a.k.a. RRM, RBD, or RNP domain)
Gglean003660.1	PF05183.7	RNA dependent RNA polymerase
Gglean003664.1	PF02893.15	GRAM domain
Gglean003665.1	PF00294.19	pfkB family carbohydrate kinase
Gglean003666.1	PF12455.3;PF01302.20	Dynein associated protein;; CAP-Gly domain
Gglean003668.1	PF12766.2;PF01243.15	Pyridoxamine 5'-phosphate oxidase;; Pyridoxamine 5'-phosphate oxidase
Gglean003669.1	PF12766.2;PF01243.15	Pyridoxamine 5'-phosphate oxidase;; Pyridoxamine 5'-phosphate oxidase
Gglean003670.1	PF00415.13	Regulator of chromosome condensation (RCC1) repeat
Gglean003674.1	PF01425.16	Amidase
Gglean003675.1	PF02518.21;PF03707.11;PF00072.19	Histidine kinase-, DNA gyrase B-, and HSP90-like ATPase;; Bacterial signalling protein N terminal repeat;; Response regulator receiver domain
Gglean003676.1	PF06415.8;PF01676.13;PF00884.18;PF01663.17	BPG-independent PGAM N-terminus (iPGM_N);; Metalloenzyme superfamily;; Sulfatase;; Type I phosphodiesterase / nucleotide pyrophosphatase
Gglean003679.1	PF07855.7	Protein of unknown function (DUF1649)
Gglean003683.1	PF06886.6	Targeting protein for Xklp2 (TPX2)
Gglean003685.1	PF00248.16	Aldo/keto reductase family
Gglean003686.1	PF00240.18;PF01020.12;PF11976.3;PF14560.1	Ubiquitin family;; Ribosomal L40e family;; Ubiquitin-2 like Rad60 SUMO-like;; Ubiquitin-like domain
Gglean003688.1	PF00069.20;PF07714.12	Protein kinase domain;; Protein tyrosine kinase
Gglean003689.1	PF07717.11;PF04408.18;PF00271.26;PF00575.18;PF00270.24;PF00437.15	Oligonucleotide/oligosaccharide-binding (OB)-fold;; Helicase associated domain (HA2);; Helicase conserved C-terminal domain;; S1 RNA binding domain;; DEAD/DEAH box helicase;; Type II/IV secretion system protein
Gglean003690.1	PF01602.15;PF13513.1	Adaptin N terminal region;; HEAT-like repeat
Gglean003691.1	PF00179.21;PF05743.8	Ubiquitin-conjugating enzyme;; UEV domain
Gglean003693.1	PF00754.20	F5/8 type C domain
Gglean003694.1	PF00566.13	Rab-GTPase-TBC domain
Gglean003696.1	PF07690.11	Major Facilitator Superfamily
Gglean003697.1	PF12998.2	Inhibitor of growth proteins N-terminal histone-binding
Gglean003698.1	PF00628.24	PHD-finger
Gglean003699.1	PF12937.2;PF00646.28	F-box-like;; F-box domain
Gglean003701.1	PF00153.22	Mitochondrial carrier protein
Gglean003702.1	PF11701.3	Myosin-binding striated muscle assembly central
Gglean003703.1	PF07993.7;PF00501.23;PF01370.16;PF00550.20;PF00106.20	Male sterility protein;; AMP-binding enzyme;; NAD dependent epimerase/dehydratase family;; Phosphopantetheine attachment site;; short chain dehydrogenase
Gglean003705.1	PF00677.12	Lumazine binding domain
Gglean003710.1	PF08700.6	Vps51/Vps67
Gglean003711.1	PF00639.16;PF13616.1	PPIC-type PPIASE domain;; PPIC-type PPIASE domain
Gglean003713.1	PF05368.8;PF13460.1;PF01073.14	NmrA-like family;; NADH(P)-binding;; 3-beta hydroxysteroid dehydrogenase/isomerase family
Gglean003714.1	PF13460.1;PF01370.16	NADH(P)-binding;; NAD dependent epimerase/dehydratase family
Gglean003715.1	PF03473.12	MOSC domain
Gglean003716.1	PF13391.1	HNH endonuclease
Gglean003717.1	PF00176.18;PF09111.5;PF09110.6;PF00271.26;PF04851.10;PF00270.24	SNF2 family N-terminal domain;; SLIDE;; HAND;; Helicase conserved C-terminal domain;; Type III restriction enzyme, res subunit;; DEAD/DEAH box helicase
Gglean003720.1	PF00063.16;PF06017.8;PF00018.23;PF14604.1;PF07653.12	Myosin head (motor domain);; Myosin tail;; SH3 domain;; Variant SH3 domain;; Variant SH3 domain
Gglean003722.1	PF01417.15;PF08226.6	ENTH domain;; Domain of unknown function (DUF1720)
Gglean003723.1	PF01738.13	Dienelactone hydrolase family
Gglean003724.1	PF01738.13	Dienelactone hydrolase family
Gglean003727.1	PF04189.8	Gcd10p family
Gglean003728.1	PF02194.10;PF08628.7;PF00787.19;PF00615.14	PXA domain;; Sorting nexin C terminal;; PX domain;; Regulator of G protein signaling domain
Gglean003731.1	PF00102.22	Protein-tyrosine phosphatase
Gglean003732.1	PF00107.21;PF13602.1;PF08240.7	Zinc-binding dehydrogenase;; Zinc-binding dehydrogenase;; Alcohol dehydrogenase GroES-like domain
Gglean003735.1	PF01545.16	Cation efflux family
Gglean003736.1	PF00069.20;PF07714.12	Protein kinase domain;; Protein tyrosine kinase
Gglean003738.1	PF03171.15;PF14226.1	2OG-Fe(II) oxygenase superfamily;; non-haem dioxygenase in morphine synthesis N-terminal
Gglean003739.1	PF02136.15;PF10429.4	Nuclear transport factor 2 (NTF2) domain;; Nuclear pore RNA shuttling protein Mtr2
Gglean003740.1	PF04408.18;PF07717.11;PF00271.26;PF00270.24	Helicase associated domain (HA2);; Oligonucleotide/oligosaccharide-binding (OB)-fold;; Helicase conserved C-terminal domain;; DEAD/DEAH box helicase
Gglean003741.1	PF09810.4	Exonuclease V - a 5' deoxyribonuclease
Gglean003744.1	PF04145.10	Ctr copper transporter family
Gglean003745.1	PF03446.10;PF14833.1;PF03807.12	NAD binding domain of 6-phosphogluconate dehydrogenase;; NAD-binding of NADP-dependent 3-hydroxyisobutyrate dehydrogenase;; NADP oxidoreductase coenzyme F420-dependent
Gglean003747.1	PF02469.17	Fasciclin domain
Gglean003750.1	PF05182.8	Fip1 motif
Gglean003752.1	PF00118.19	TCP-1/cpn60 chaperonin family
Gglean003755.1	PF00335.15	Tetraspanin family
Gglean003756.1	PF01207.12;PF01680.12	Dihydrouridine synthase (Dus);; SOR/SNZ family
Gglean003758.1	PF00005.22;PF13304.1;PF12698.2;PF13476.1	ABC transporter;; AAA domain;; ABC-2 family transporter protein;; AAA domain
Gglean003760.1	PF14538.1;PF00400.27;PF02985.17	Raptor N-terminal CASPase like domain;; WD domain, G-beta repeat;; HEAT repeat
Gglean003761.1	PF00096.21;PF13894.1;PF12171.3	Zinc finger, C2H2 type;; C2H2-type zinc finger;; Zinc-finger double-stranded RNA-binding
Gglean003762.1	PF00069.20;PF07714.12	Protein kinase domain;; Protein tyrosine kinase
Gglean003764.1	PF00085.15;PF13098.1;PF13905.1;PF00578.16;PF08534.5	Thioredoxin;; Thioredoxin-like domain;; Thioredoxin-like;; AhpC/TSA family;; Redoxin
Gglean003765.1	PF01544.13	CorA-like Mg2+ transporter protein
Gglean003766.1	PF01544.13	CorA-like Mg2+ transporter protein
Gglean003768.1	PF01476.15	LysM domain
Gglean003769.1	PF01284.18	Membrane-associating domain
Gglean003771.1	PF03079.9;PF07883.6;PF02311.14	ARD/ARD' family;; Cupin domain;; AraC-like ligand binding domain
Gglean003778.1	PF00310.16;PF13522.1;PF00156.22;PF13537.1;PF13230.1	Glutamine amidotransferases class-II;; Glutamine amidotransferase domain;; Phosphoribosyl transferase domain;; Glutamine amidotransferase domain;; Glutamine amidotransferases class-II
Gglean003779.1	PF01699.19	Sodium/calcium exchanger protein
Gglean003780.1	PF00885.14	6,7-dimethyl-8-ribityllumazine synthase
Gglean003781.1	PF04670.7;PF00071.17;PF08477.8;PF00025.16;PF01926.18	Gtr1/RagA G protein conserved region;; Ras family;; Miro-like protein;; ADP-ribosylation factor family;; 50S ribosome-binding GTPase
Gglean003782.1	PF04146.10	YT521-B-like domain
Gglean003784.1	PF00400.27;PF11715.3;PF08662.6	WD domain, G-beta repeat;; Nucleoporin Nup120/160;; Eukaryotic translation initiation factor eIF2A
Gglean003785.1	PF03169.10	OPT oligopeptide transporter protein
Gglean003786.1	PF03169.10	OPT oligopeptide transporter protein
Gglean003787.1	PF00400.27	WD domain, G-beta repeat
Gglean003788.1	PF00106.20;PF13561.1	short chain dehydrogenase;; Enoyl-(Acyl carrier protein) reductase
Gglean003789.1	PF13508.1;PF13673.1;PF00583.19	Acetyltransferase (GNAT) domain;; Acetyltransferase (GNAT) domain;; Acetyltransferase (GNAT) family
Gglean003790.1	PF13508.1;PF13673.1;PF00583.19	Acetyltransferase (GNAT) domain;; Acetyltransferase (GNAT) domain;; Acetyltransferase (GNAT) family
Gglean003791.1	PF00225.18	Kinesin motor domain
Gglean003794.1	PF13561.1;PF00106.20;PF08659.5	Enoyl-(Acyl carrier protein) reductase;; short chain dehydrogenase;; KR domain
Gglean003795.1	PF00989.19;PF00320.22	PAS fold;; GATA zinc finger
Gglean003796.1	PF00172.13	Fungal Zn(2)-Cys(6) binuclear cluster domain
Gglean003797.1	PF00155.16	Aminotransferase class I and II
Gglean003798.1	PF00491.16	Arginase family
Gglean003799.1	PF00098.18	Zinc knuckle
Gglean003800.1	PF00106.20;PF08659.5;PF01370.16	short chain dehydrogenase;; KR domain;; NAD dependent epimerase/dehydratase family
Gglean000201.1	PF00481.16;PF07228.7	Protein phosphatase 2C;; Stage II sporulation protein E (SpoIIE)
Gglean000202.1	PF02020.13	eIF4-gamma/eIF5/eIF2-epsilon
Gglean000203.1	PF05922.11	Peptidase inhibitor I9
Gglean000207.1	PF00076.17;PF14259.1	RNA recognition motif. (a.k.a. RRM, RBD, or RNP domain);; RNA recognition motif (a.k.a. RRM, RBD, or RNP domain)
Gglean000209.1	PF04258.8;PF06550.6	Signal peptide peptidase;; Protein of unknown function (DUF1119)
Gglean000210.1	PF00026.18;PF14543.1	Eukaryotic aspartyl protease;; Xylanase inhibitor N-terminal
Gglean000211.1	PF08550.5	Fungal protein of unknown function (DUF1752)
Gglean000212.1	PF01369.15;PF15410.1;PF00320.22	Sec7 domain;; Pleckstrin homology domain;; GATA zinc finger
Gglean000214.1	PF00400.27	WD domain, G-beta repeat
Gglean000216.1	PF02463.14;PF06470.8;PF13476.1	RecF/RecN/SMC N terminal domain;; SMC proteins Flexible Hinge Domain;; AAA domain
Gglean000217.1	PF02463.14;PF13175.1;PF13304.1	RecF/RecN/SMC N terminal domain;; AAA ATPase domain;; AAA domain
Gglean000218.1	PF05346.6	Eukaryotic membrane protein family
Gglean000219.1	PF06687.7	SUR7/PalI family
Gglean000221.1	PF02581.12;PF02110.10	Thiamine monophosphate synthase/TENI;; Hydroxyethylthiazole kinase family
Gglean000222.1	PF02110.10	Hydroxyethylthiazole kinase family
Gglean000223.1	PF00621.15;PF15411.1;PF00564.19;PF06395.6	RhoGEF domain;; Pleckstrin homology domain;; PB1 domain;; CDC24 Calponin
Gglean000224.1	PF03200.11	Mannosyl oligosaccharide glucosidase
Gglean000229.1	PF00651.26	BTB/POZ domain
Gglean000230.1	PF04406.9	Type IIB DNA topoisomerase
Gglean000232.1	PF13401.1;PF00004.24;PF13191.1;PF13604.1;PF07693.9;PF05729.7	AAA domain;; ATPase family associated with various cellular activities (AAA);; AAA ATPase domain;; AAA domain;; KAP family P-loop domain;; NACHT domain
Gglean000234.1	PF08630.5;PF07535.7	Dfp1/Him1, central region;; DBF zinc finger
Gglean000235.1	PF00172.13	Fungal Zn(2)-Cys(6) binuclear cluster domain
Gglean000236.1	PF00416.17	Ribosomal protein S13/S18
Gglean000240.1	PF12756.2;PF12171.3;PF12874.2	C2H2 type zinc-finger (2 copies);; Zinc-finger double-stranded RNA-binding;; Zinc-finger of C2H2 type
Gglean000241.1	PF00775.16;PF04444.9	Dioxygenase;; Catechol dioxygenase N terminus
Gglean000243.1	PF01536.11	Adenosylmethionine decarboxylase
Gglean000244.1	PF01536.11	Adenosylmethionine decarboxylase
Gglean000246.1	PF02953.10	Tim10/DDP family zinc finger
Gglean000249.1	PF10021.4	Uncharacterized protein conserved in bacteria (DUF2263)
Gglean000250.1	PF02826.14;PF00389.25	D-isomer specific 2-hydroxyacid dehydrogenase, NAD binding domain;; D-isomer specific 2-hydroxyacid dehydrogenase, catalytic domain
Gglean000252.1	PF02201.13	SWIB/MDM2 domain
Gglean000258.1	PF09497.5	Transcription mediator complex subunit Med12
Gglean000259.1	PF00651.26	BTB/POZ domain
Gglean000260.1	PF03909.12	BSD domain
Gglean000263.1	PF01704.13	UTP--glucose-1-phosphate uridylyltransferase
Gglean000264.1	PF01704.13	UTP--glucose-1-phosphate uridylyltransferase
Gglean000265.1	PF01201.17	Ribosomal protein S8e
Gglean000266.1	PF00856.23;PF02178.14	SET domain;; AT hook motif
Gglean000267.1	PF12859.2	Anaphase-promoting complex subunit 1
Gglean000268.1	PF05368.8;PF13460.1	NmrA-like family;; NADH(P)-binding
Gglean000272.1	PF08638.6	Mediator complex subunit MED14
Gglean000274.1	PF07690.11;PF00083.19	Major Facilitator Superfamily;; Sugar (and other) transporter
Gglean000275.1	PF07859.8;PF10340.4	alpha/beta hydrolase fold;; Protein of unknown function (DUF2424)
Gglean000277.1	PF12619.3;PF00493.18	Mini-chromosome maintenance protein 2;; MCM2/3/5 family
Gglean000278.1	PF00005.22;PF00664.18;PF13191.1;PF13304.1;PF07673.9	ABC transporter;; ABC transporter transmembrane region;; AAA ATPase domain;; AAA domain;; Protein of unknown function (DUF1602)
Gglean000279.1	PF00076.17;PF14259.1;PF13893.1	RNA recognition motif. (a.k.a. RRM, RBD, or RNP domain);; RNA recognition motif (a.k.a. RRM, RBD, or RNP domain);; RNA recognition motif. (a.k.a. RRM, RBD, or RNP domain)
Gglean000280.1	PF00505.14	HMG (high mobility group) box
Gglean000281.1	PF10343.4	Protein of unknown function (DUF2419)
Gglean000282.1	PF09424.5	Yqey-like protein
Gglean000283.1	PF07969.6;PF01979.15	Amidohydrolase family;; Amidohydrolase family
Gglean000284.1	PF00176.18;PF00271.26;PF00270.24;PF04851.10;PF11496.3	SNF2 family N-terminal domain;; Helicase conserved C-terminal domain;; DEAD/DEAH box helicase;; Type III restriction enzyme, res subunit;; Class II histone deacetylase complex subunits 2 and 3
Gglean000285.1	PF00867.13	XPG I-region
Gglean000286.1	PF00814.20	Glycoprotease family
Gglean000288.1	PF10346.4	Conidiation protein 6
Gglean000292.1	PF04188.8	Mannosyltransferase (PIG-V))
Gglean000293.1	PF06398.6	Integral peroxisomal membrane peroxin
Gglean000294.1	PF12697.2	Alpha/beta hydrolase family
Gglean000295.1	PF04912.9	Dynamitin
Gglean000297.1	PF00782.15;PF05706.7	Dual specificity phosphatase, catalytic domain;; Cyclin-dependent kinase inhibitor 3 (CDKN3)
Gglean000298.1	PF13414.1;PF13432.1;PF07719.12;PF00515.23;PF14559.1;PF13428.1;PF13431.1;PF13424.1;PF13181.1;PF12895.2;PF13176.1;PF13371.1;PF13174.1	TPR repeat;; Tetratricopeptide repeat;; Tetratricopeptide repeat;; Tetratricopeptide repeat;; Tetratricopeptide repeat;; Tetratricopeptide repeat;; Tetratricopeptide repeat;; Tetratricopeptide repeat;; Tetratricopeptide repeat;; Anaphase-promoting complex, cyclosome, subunit 3;; Tetratricopeptide repeat;; Tetratricopeptide repeat;; Tetratricopeptide repeat
Gglean000301.1	PF08657.5	DASH complex subunit Spc34
Gglean000302.1	PF14429.1;PF06920.8	C2 domain in Dock180 and Zizimin proteins;; Dedicator of cytokinesis
Gglean000303.1	PF11571.3	Mediator complex subunit 27
Gglean000304.1	PF07766.8	LETM1-like protein
Gglean000305.1	PF03142.10;PF13632.1;PF13641.1;PF00173.23;PF13506.1	Chitin synthase;; Glycosyl transferase family group 2;; Glycosyltransferase like family 2;; Cytochrome b5-like Heme/Steroid binding domain;; Glycosyl transferase family 21
Gglean000306.1	PF01112.13	Asparaginase
Gglean000307.1	PF01266.19;PF01494.14;PF03486.9;PF00070.22;PF00890.19;PF07992.9;PF01593.19;PF13450.1;PF04820.9	FAD dependent oxidoreductase;; FAD binding domain;; HI0933-like protein;; Pyridine nucleotide-disulphide oxidoreductase;; FAD binding domain;; Pyridine nucleotide-disulphide oxidoreductase;; Flavin containing amine oxidoreductase;; NAD(P)-binding Rossmann-like domain;; Tryptophan halogenase
Gglean000309.1	PF08539.6	HbrB-like
Gglean000310.1	PF12678.2;PF13639.1;PF00097.20;PF13920.1;PF13923.1	RING-H2 zinc finger;; Ring finger domain;; Zinc finger, C3HC4 type (RING finger);; Zinc finger, C3HC4 type (RING finger);; Zinc finger, C3HC4 type (RING finger)
Gglean000312.1	PF00331.15	Glycosyl hydrolase family 10
Gglean000313.1	PF01513.16	ATP-NAD kinase
Gglean000314.1	PF00465.14;PF13685.1;PF01761.15	Iron-containing alcohol dehydrogenase;; Iron-containing alcohol dehydrogenase;; 3-dehydroquinate synthase
Gglean000317.1	PF01293.15	Phosphoenolpyruvate carboxykinase
Gglean000318.1	PF02985.17;PF00069.20	HEAT repeat;; Protein kinase domain
Gglean000321.1	PF00118.19	TCP-1/cpn60 chaperonin family
Gglean000322.1	PF02089.10	Palmitoyl protein thioesterase
Gglean000323.1	PF12697.2	Alpha/beta hydrolase family
Gglean000324.1	PF00988.17;PF00117.23;PF07722.8	Carbamoyl-phosphate synthase small chain, CPSase domain;; Glutamine amidotransferase class-I;; Peptidase C26
Gglean000326.1	PF13923.1;PF00097.20;PF12240.3	Zinc finger, C3HC4 type (RING finger);; Zinc finger, C3HC4 type (RING finger);; Angiomotin C terminal
Gglean000327.1	PF00075.19	RNase H
Gglean000331.1	PF00248.16	Aldo/keto reductase family
Gglean000333.1	PF04900.7	Fcf1
Gglean000334.1	PF08939.5	Domain of unknown function (DUF1917)
Gglean000335.1	PF02854.14	MIF4G domain
Gglean000336.1	PF00929.19	Exonuclease
Gglean000338.1	PF01239.17	Protein prenyltransferase alpha subunit repeat
Gglean000339.1	PF08238.7	Sel1 repeat
Gglean000343.1	PF07690.11;PF00083.19	Major Facilitator Superfamily;; Sugar (and other) transporter
Gglean000344.1	PF00067.17	Cytochrome P450
Gglean000345.1	PF00067.17	Cytochrome P450
Gglean000346.1	PF07690.11	Major Facilitator Superfamily
Gglean000348.1	PF02826.14;PF00389.25	D-isomer specific 2-hydroxyacid dehydrogenase, NAD binding domain;; D-isomer specific 2-hydroxyacid dehydrogenase, catalytic domain
Gglean000349.1	PF00076.17;PF14259.1	RNA recognition motif. (a.k.a. RRM, RBD, or RNP domain);; RNA recognition motif (a.k.a. RRM, RBD, or RNP domain)
Gglean000350.1	PF03311.9	Cornichon protein
Gglean000351.1	PF00153.22	Mitochondrial carrier protein
Gglean000356.1	PF06916.8	Protein of unknown function (DUF1279)
Gglean000358.1	PF12768.2;PF00018.23;PF07653.12	Cortical protein marker for cell polarity;; SH3 domain;; Variant SH3 domain
Gglean000363.1	PF01411.14;PF07973.9;PF02272.14	tRNA synthetases class II (A);; Threonyl and Alanyl tRNA synthetase second additional domain;; DHHA1 domain
Gglean000365.1	PF04130.8	Spc97 / Spc98 family
Gglean000370.1	PF00153.22	Mitochondrial carrier protein
Gglean000371.1	PF00620.22	RhoGAP domain
Gglean000374.1	PF05721.8	Phytanoyl-CoA dioxygenase (PhyH)
Gglean000375.1	PF08264.8	Anticodon-binding domain of tRNA
Gglean000378.1	PF00398.15	Ribosomal RNA adenine dimethylase
Gglean000379.1	PF10022.4	Uncharacterized protein conserved in bacteria (DUF2264)
Gglean000383.1	PF11718.3;PF10996.3;PF00753.22;PF07521.7;PF12706.2;PF13483.1	Pre-mRNA 3'-end-processing endonuclease polyadenylation factor C-term;; Beta-Casp domain;; Metallo-beta-lactamase superfamily;; RNA-metabolising metallo-beta-lactamase;; Beta-lactamase superfamily domain;; Beta-lactamase superfamily domain
Gglean000385.1	PF03595.12	Voltage-dependent anion channel
Gglean000387.1	PF01019.16	Gamma-glutamyltranspeptidase
Gglean000388.1	PF00150.13	Cellulase (glycosyl hydrolase family 5)
Gglean000391.1	PF00730.20	HhH-GPD superfamily base excision DNA repair protein
Gglean000392.1	PF00069.20;PF07714.12	Protein kinase domain;; Protein tyrosine kinase
Gglean000393.1	PF01058.17	NADH ubiquinone oxidoreductase, 20 Kd subunit
Gglean000395.1	PF03962.10	Mnd1 family
Gglean000396.1	PF00172.13;PF04082.13	Fungal Zn(2)-Cys(6) binuclear cluster domain;; Fungal specific transcription factor domain
Gglean000397.1	PF04515.7	Plasma-membrane choline transporter
Gglean000400.1	PF08161.7	NUC173 domain
Gglean003801.1	PF00664.18;PF00005.22;PF13304.1	ABC transporter transmembrane region;; ABC transporter;; AAA domain
Gglean003802.1	PF03501.10	Plectin/S10 domain
Gglean003806.1	PF04082.13;PF00172.13	Fungal specific transcription factor domain;; Fungal Zn(2)-Cys(6) binuclear cluster domain
Gglean003808.1	PF00583.19;PF08445.5	Acetyltransferase (GNAT) family;; FR47-like protein
Gglean003809.1	PF00034.16;PF13442.1	Cytochrome c;; Cytochrome C oxidase, cbb3-type, subunit III
Gglean003810.1	PF02270.10	Transcription initiation factor IIF, beta subunit
Gglean003818.1	PF01753.13	MYND finger
Gglean003820.1	PF00106.20;PF13460.1	short chain dehydrogenase;; NADH(P)-binding
Gglean003821.1	PF00106.20;PF08643.5	short chain dehydrogenase;; Fungal family of unknown function (DUF1776)
Gglean003832.1	PF00026.18	Eukaryotic aspartyl protease
Gglean003833.1	PF00153.22	Mitochondrial carrier protein
Gglean003837.1	PF00227.21;PF10584.4	Proteasome subunit;; Proteasome subunit A N-terminal signature
Gglean003838.1	PF01634.13	ATP phosphoribosyltransferase
Gglean003839.1	PF08029.6	HisG, C-terminal domain
Gglean003840.1	PF00459.20	Inositol monophosphatase family
Gglean003844.1	PF03142.10;PF13632.1;PF13641.1;PF13506.1	Chitin synthase;; Glycosyl transferase family group 2;; Glycosyltransferase like family 2;; Glycosyl transferase family 21
Gglean003845.1	PF11338.3	Protein of unknown function (DUF3140)
Gglean003848.1	PF00067.17	Cytochrome P450
Gglean003850.1	PF00125.19	Core histone H2A/H2B/H3/H4
Gglean003851.1	PF03947.13;PF00181.18	Ribosomal Proteins L2, C-terminal domain;; Ribosomal Proteins L2, RNA binding domain
Gglean003852.1	PF10294.4;PF12847.2	Putative methyltransferase;; Methyltransferase domain
Gglean003856.1	PF00163.14;PF01479.20	Ribosomal protein S4/S9 N-terminal domain;; S4 domain
Gglean003859.1	PF00728.17;PF02838.10	Glycosyl hydrolase family 20, catalytic domain;; Glycosyl hydrolase family 20, domain 2
Gglean003861.1	PF00118.19	TCP-1/cpn60 chaperonin family
Gglean003862.1	PF13499.1;PF00036.27;PF13405.1;PF13833.1;PF13202.1;PF14658.1;PF12763.2	EF-hand domain pair;; EF hand;; EF-hand domain;; EF-hand domain pair;; EF hand;; EF-hand domain;; Cytoskeletal-regulatory complex EF hand
Gglean003867.1	PF00096.21;PF13894.1	Zinc finger, C2H2 type;; C2H2-type zinc finger
Gglean003869.1	PF01532.15	Glycosyl hydrolase family 47
Gglean003870.1	PF01532.15	Glycosyl hydrolase family 47
Gglean003873.1	PF07690.11;PF06609.8;PF00083.19	Major Facilitator Superfamily;; Fungal trichothecene efflux pump (TRI12);; Sugar (and other) transporter
Gglean003875.1	PF00400.27;PF01680.12;PF12265.3	WD domain, G-beta repeat;; SOR/SNZ family;; Histone-binding protein RBBP4 or subunit C of CAF1 complex
Gglean003876.1	PF12157.3	Protein of unknown function (DUF3591)
Gglean003878.1	PF00096.21	Zinc finger, C2H2 type
Gglean003879.1	PF00171.17	Aldehyde dehydrogenase family
Gglean003880.1	PF00445.13	Ribonuclease T2 family
Gglean003883.1	PF01937.14	Protein of unknown function DUF89
Gglean003885.1	PF06463.8;PF04055.16;PF13353.1	Molybdenum Cofactor Synthesis C;; Radical SAM superfamily;; 4Fe-4S single cluster domain
Gglean003886.1	PF01967.16	MoaC family
Gglean003887.1	PF01026.16	TatD related DNase
Gglean003889.1	PF00583.19	Acetyltransferase (GNAT) family
Gglean003891.1	PF00569.12	Zinc finger, ZZ type
Gglean003893.1	PF00557.19	Metallopeptidase family M24
Gglean003894.1	PF00557.19	Metallopeptidase family M24
Gglean003895.1	PF07859.8;PF10340.4;PF00326.16	alpha/beta hydrolase fold;; Protein of unknown function (DUF2424);; Prolyl oligopeptidase family
Gglean003898.1	PF01784.13	NIF3 (NGG1p interacting factor 3)
Gglean003899.1	PF09451.5;PF00878.13;PF02157.10	Autophagy-related protein 27;; Cation-independent mannose-6-phosphate receptor repeat;; Mannose-6-phosphate receptor
Gglean003900.1	PF00010.21	Helix-loop-helix DNA-binding domain
Gglean003903.1	PF00010.21	Helix-loop-helix DNA-binding domain
Gglean003905.1	PF02970.11	Tubulin binding cofactor A
Gglean003906.1	PF00443.24	Ubiquitin carboxyl-terminal hydrolase
Gglean003907.1	PF09243.5	Mitochondrial small ribosomal subunit Rsm22
Gglean003908.1	PF09812.4	Mitochondrial ribosomal protein L28
Gglean003911.1	PF00248.16	Aldo/keto reductase family
Gglean003912.1	PF01504.13;PF00118.19;PF01363.16	Phosphatidylinositol-4-phosphate 5-Kinase;; TCP-1/cpn60 chaperonin family;; FYVE zinc finger
Gglean003913.1	PF00443.24;PF02148.14	Ubiquitin carboxyl-terminal hydrolase;; Zn-finger in ubiquitin-hydrolases and other protein
Gglean003914.1	PF00400.27;PF08662.6	WD domain, G-beta repeat;; Eukaryotic translation initiation factor eIF2A
Gglean003916.1	PF05769.6	Protein of unknown function (DUF837)
Gglean003917.1	PF00071.17;PF08477.8;PF00025.16	Ras family;; Miro-like protein;; ADP-ribosylation factor family
Gglean003918.1	PF03398.9	Regulator of Vps4 activity in the MVB pathway
Gglean003920.1	PF13489.1;PF08242.7;PF12847.2;PF08241.7;PF02390.12;PF01728.14	Methyltransferase domain;; Methyltransferase domain;; Methyltransferase domain;; Methyltransferase domain;; Putative methyltransferase;; FtsJ-like methyltransferase
Gglean003921.1	PF00270.24;PF00271.26	DEAD/DEAH box helicase;; Helicase conserved C-terminal domain
Gglean003922.1	PF08148.7	DSHCT (NUC185) domain
Gglean003923.1	PF01920.15	Prefoldin subunit
Gglean003924.1	PF13202.1;PF13405.1;PF13499.1;PF00036.27;PF13833.1	EF hand;; EF-hand domain;; EF-hand domain pair;; EF hand;; EF-hand domain pair
Gglean003925.1	PF05680.7	ATP synthase E chain
Gglean003926.1	PF00400.27;PF12265.3	WD domain, G-beta repeat;; Histone-binding protein RBBP4 or subunit C of CAF1 complex
Gglean003927.1	PF10354.4	Domain of unknown function (DUF2431)
Gglean003928.1	PF00378.15	Enoyl-CoA hydratase/isomerase family
Gglean003929.1	PF09768.4	Peptidase M76 family
Gglean003930.1	PF10342.4	Ser-Thr-rich glycosyl-phosphatidyl-inositol-anchored membrane family
Gglean003932.1	PF01644.12;PF03142.10;PF08407.6;PF13641.1;PF13632.1	Chitin synthase;; Chitin synthase;; Chitin synthase N-terminal;; Glycosyltransferase like family 2;; Glycosyl transferase family group 2
Gglean003933.1	PF00027.24;PF01734.17	Cyclic nucleotide-binding domain;; Patatin-like phospholipase
Gglean003934.1	PF00995.18	Sec1 family
Gglean003935.1	PF04690.8	YABBY protein
Gglean003936.1	PF12937.2;PF13516.1	F-box-like;; Leucine Rich repeat
Gglean003937.1	PF07189.6	Splicing factor 3B subunit 10 (SF3b10)
Gglean003938.1	PF08241.7;PF13489.1;PF12847.2;PF08242.7;PF13649.1;PF01209.13;PF13847.1	Methyltransferase domain;; Methyltransferase domain;; Methyltransferase domain;; Methyltransferase domain;; Methyltransferase domain;; ubiE/COQ5 methyltransferase family;; Methyltransferase domain
Gglean003939.1	PF08325.5;PF01863.12	WLM domain;; Protein of unknown function DUF45
Gglean003940.1	PF12298.3	Eukaryotic mitochondrial regulator protein
Gglean003942.1	PF00176.18;PF00270.24;PF04851.10;PF13923.1;PF00097.20	SNF2 family N-terminal domain;; DEAD/DEAH box helicase;; Type III restriction enzyme, res subunit;; Zinc finger, C3HC4 type (RING finger);; Zinc finger, C3HC4 type (RING finger)
Gglean003943.1	PF00010.21	Helix-loop-helix DNA-binding domain
Gglean003944.1	PF04450.7;PF13485.1	Peptidase of plants and bacteria;; Peptidase MA superfamily
Gglean003945.1	PF00106.20	short chain dehydrogenase
Gglean003946.1	PF13405.1;PF13499.1;PF00036.27	EF-hand domain;; EF-hand domain pair;; EF hand
Gglean003949.1	PF00439.20	Bromodomain
Gglean003951.1	PF00889.14	Elongation factor TS
Gglean003952.1	PF00675.15;PF05193.16	Insulinase (Peptidase family M16);; Peptidase M16 inactive domain
Gglean003954.1	PF01704.13	UTP--glucose-1-phosphate uridylyltransferase
Gglean003955.1	PF04615.8	Utp14 protein
Gglean003956.1	PF00069.20;PF07714.12	Protein kinase domain;; Protein tyrosine kinase
Gglean003957.1	PF02290.10	Signal recognition particle 14kD protein
Gglean003958.1	PF05277.7	Protein of unknown function (DUF726)
Gglean003961.1	PF00069.20;PF07714.12;PF14531.1;PF08587.6	Protein kinase domain;; Protein tyrosine kinase;; Kinase-like;; Ubiquitin associated domain (UBA)
Gglean003962.1	PF00806.14	Pumilio-family RNA binding repeat
Gglean003963.1	PF01066.16	CDP-alcohol phosphatidyltransferase
Gglean003964.1	PF13393.1;PF00587.20;PF03129.15	Histidyl-tRNA synthetase;; tRNA synthetase class II core domain (G, H, P, S and T);; Anticodon binding domain
Gglean003965.1	PF00076.17;PF14259.1;PF13893.1	RNA recognition motif. (a.k.a. RRM, RBD, or RNP domain);; RNA recognition motif (a.k.a. RRM, RBD, or RNP domain);; RNA recognition motif. (a.k.a. RRM, RBD, or RNP domain)
Gglean003967.1	PF09994.4	Uncharacterized alpha/beta hydrolase domain (DUF2235)
Gglean003969.1	PF00113.17;PF03952.11;PF13378.1	Enolase, C-terminal TIM barrel domain;; Enolase, N-terminal domain;; Enolase C-terminal domain-like
Gglean003970.1	PF05997.7	Nucleolar protein,Nop52
Gglean003971.1	PF04130.8	Spc97 / Spc98 family
Gglean003972.1	PF00719.14	Inorganic pyrophosphatase
Gglean003973.1	PF00125.19;PF02969.12	Core histone H2A/H2B/H3/H4;; TATA box binding protein associated factor (TAF)
Gglean003975.1	PF00018.23;PF14604.1;PF07653.12	SH3 domain;; Variant SH3 domain;; Variant SH3 domain
Gglean003976.1	PF09429.5;PF12622.2	WW domain binding protein 11;; mRNA biogenesis factor
Gglean003977.1	PF01753.13	MYND finger
Gglean003979.1	PF08423.6;PF00154.16;PF13481.1;PF06745.8	Rad51;; recA bacterial DNA recombination protein;; AAA domain;; KaiC
Gglean003980.1	PF07110.6	EthD domain
Gglean003987.1	PF00995.18	Sec1 family
Gglean003988.1	PF00400.27	WD domain, G-beta repeat
Gglean003990.1	PF00491.16	Arginase family
Gglean003991.1	PF00009.22;PF03764.13;PF00679.19;PF03144.20;PF14492.1;PF01926.18	Elongation factor Tu GTP binding domain;; Elongation factor G, domain IV;; Elongation factor G C-terminus;; Elongation factor Tu domain 2;; Elongation Factor G, domain II;; 50S ribosome-binding GTPase
Gglean003992.1	PF01636.18	Phosphotransferase enzyme family
Gglean003995.1	PF03998.8	Utp11 protein
Gglean003996.1	PF00011.16	Hsp20/alpha crystallin family
Gglean003997.1	PF08542.6;PF00004.24;PF13177.1;PF13173.1;PF13191.1;PF03215.10;PF05496.7;PF07726.6;PF01443.13	Replication factor C C-terminal domain;; ATPase family associated with various cellular activities (AAA);; DNA polymerase III, delta subunit;; AAA domain;; AAA ATPase domain;; Rad17 cell cycle checkpoint protein;; Holliday junction DNA helicase ruvB N-terminus;; ATPase family associated with various cellular activities (AAA);; Viral (Superfamily 1) RNA helicase
Gglean003998.1	PF10609.4;PF01656.18;PF13614.1;PF09140.6;PF02374.10	ParA/MinD ATPase like;; CobQ/CobB/MinD/ParA nucleotide binding domain;; AAA domain;; ATPase MipZ;; Anion-transporting ATPase
Gglean004000.1	PF01192.17	RNA polymerase Rpb6
Gglean004002.1	PF07651.11;PF01608.12;PF01417.15	ANTH domain;; I/LWEQ domain;; ENTH domain
Gglean004003.1	PF12542.3;PF10197.4	Pre-mRNA splicing factor;; N-terminal domain of CBF1 interacting co-repressor CIR
Gglean004004.1	PF07690.11;PF00083.19;PF13347.1;PF06609.8;PF12832.2	Major Facilitator Superfamily;; Sugar (and other) transporter;; MFS/sugar transport protein;; Fungal trichothecene efflux pump (TRI12);; MFS_1 like family
Gglean004006.1	PF02301.13	HORMA domain
Gglean004007.1	PF06814.8	Lung seven transmembrane receptor
Gglean004008.1	PF00724.15	NADH:flavin oxidoreductase / NADH oxidase family
Gglean004009.1	PF13738.1;PF00743.14;PF13434.1;PF07992.9;PF00070.22	Pyridine nucleotide-disulphide oxidoreductase;; Flavin-binding monooxygenase-like;; L-lysine 6-monooxygenase (NADPH-requiring);; Pyridine nucleotide-disulphide oxidoreductase;; Pyridine nucleotide-disulphide oxidoreductase
Gglean004010.1	PF01501.15	Glycosyl transferase family 8
Gglean004014.1	PF04082.13;PF00172.13	Fungal specific transcription factor domain;; Fungal Zn(2)-Cys(6) binuclear cluster domain
Gglean004016.1	PF01909.18	Nucleotidyltransferase domain
Gglean004017.1	PF00676.15	Dehydrogenase E1 component
Gglean004018.1	PF00069.20;PF07714.12	Protein kinase domain;; Protein tyrosine kinase
Gglean004019.1	PF07690.11	Major Facilitator Superfamily
Gglean004022.1	PF01636.18	Phosphotransferase enzyme family
Gglean004023.1	PF06087.7	Tyrosyl-DNA phosphodiesterase
Gglean004024.1	PF10342.4	Ser-Thr-rich glycosyl-phosphatidyl-inositol-anchored membrane family
Gglean004025.1	PF07774.8;PF13360.1;PF01011.16	Protein of unknown function (DUF1620);; PQQ-like domain;; PQQ enzyme repeat
Gglean004026.1	PF00773.14;PF13638.1	RNB domain;; PIN domain
Gglean004027.1	PF00067.17	Cytochrome P450
Gglean004028.1	PF02320.11	Ubiquinol-cytochrome C reductase hinge protein
Gglean004030.1	PF02992.9	Transposase family tnp2
Gglean004032.1	PF11754.3	Velvet factor
Gglean004033.1	PF00248.16	Aldo/keto reductase family
Gglean004034.1	PF00501.23	AMP-binding enzyme
Gglean004035.1	PF00291.20;PF01546.23;PF07687.9	Pyridoxal-phosphate dependent enzyme;; Peptidase family M20/M25/M40;; Peptidase dimerisation domain
Gglean004036.1	PF13489.1;PF08241.7;PF12847.2;PF13847.1;PF02390.12;PF05148.10;PF01209.13	Methyltransferase domain;; Methyltransferase domain;; Methyltransferase domain;; Methyltransferase domain;; Putative methyltransferase;; Hypothetical methyltransferase;; ubiE/COQ5 methyltransferase family
Gglean004037.1	PF00675.15;PF05193.16	Insulinase (Peptidase family M16);; Peptidase M16 inactive domain
Gglean004038.1	PF08729.5;PF14075.1	HPC2 and ubinuclein domain;; Ubinuclein conserved middle domain
Gglean004039.1	PF08389.7;PF03810.14	Exportin 1-like protein;; Importin-beta N-terminal domain
Gglean004040.1	PF09649.5	Histone chaperone domain CHZ
Gglean004043.1	PF00122.15;PF00702.21;PF12710.2;PF13246.1	E1-E2 ATPase;; haloacid dehalogenase-like hydrolase;; haloacid dehalogenase-like hydrolase;; Putative hydrolase of sodium-potassium ATPase alpha subunit
Gglean004045.1	PF12430.3;PF12537.3	Abscisic acid G-protein coupled receptor;; Protein of unknown function (DUF3735)
Gglean004052.1	PF00010.21	Helix-loop-helix DNA-binding domain
Gglean004056.1	PF00722.16	Glycosyl hydrolases family 16
Gglean004062.1	PF07690.11	Major Facilitator Superfamily
Gglean004063.1	PF13945.1	Salt tolerance down-regulator
Gglean004064.1	PF12937.2;PF00646.28	F-box-like;; F-box domain
Gglean004070.1	PF00320.22;PF08550.5	GATA zinc finger;; Fungal protein of unknown function (DUF1752)
Gglean004073.1	PF00083.19	Sugar (and other) transporter
Gglean004074.1	PF00083.19;PF07690.11	Sugar (and other) transporter;; Major Facilitator Superfamily
Gglean004075.1	PF01756.14;PF02770.14;PF00441.19	Acyl-CoA oxidase;; Acyl-CoA dehydrogenase, middle domain;; Acyl-CoA dehydrogenase, C-terminal domain
Gglean004076.1	PF05383.12;PF00076.17;PF14259.1	La domain;; RNA recognition motif. (a.k.a. RRM, RBD, or RNP domain);; RNA recognition motif (a.k.a. RRM, RBD, or RNP domain)
Gglean004079.1	PF14792.1;PF10391.4;PF14716.1	DNA polymerase beta palm;; Fingers domain of DNA polymerase lambda;; Helix-hairpin-helix domain
Gglean004081.1	PF00330.15;PF00694.14	Aconitase family (aconitate hydratase);; Aconitase C-terminal domain
Gglean004083.1	PF00067.17	Cytochrome P450
Gglean004084.1	PF07690.11;PF00083.19	Major Facilitator Superfamily;; Sugar (and other) transporter
Gglean004085.1	PF07690.11	Major Facilitator Superfamily
Gglean004086.1	PF00067.17	Cytochrome P450
Gglean004091.1	PF01625.16	Peptide methionine sulfoxide reductase
Gglean004092.1	PF01625.16	Peptide methionine sulfoxide reductase
Gglean004094.1	PF00400.27	WD domain, G-beta repeat
Gglean004096.1	PF00328.17	Histidine phosphatase superfamily (branch 2)
Gglean004098.1	PF13894.1;PF00096.21;PF12171.3;PF12874.2;PF13912.1;PF12756.2	C2H2-type zinc finger;; Zinc finger, C2H2 type;; Zinc-finger double-stranded RNA-binding;; Zinc-finger of C2H2 type;; C2H2-type zinc finger;; C2H2 type zinc-finger (2 copies)
Gglean004102.1	PF00069.20;PF07714.12	Protein kinase domain;; Protein tyrosine kinase
Gglean004107.1	PF03109.11	ABC1 family
Gglean004108.1	PF03881.9	Fructosamine kinase
Gglean004109.1	PF00562.23;PF04563.10;PF04561.9;PF04566.8;PF04565.11;PF04560.15;PF04567.12	RNA polymerase Rpb2, domain 6;; RNA polymerase beta subunit;; RNA polymerase Rpb2, domain 2;; RNA polymerase Rpb2, domain 4;; RNA polymerase Rpb2, domain 3;; RNA polymerase Rpb2, domain 7;; RNA polymerase Rpb2, domain 5
Gglean004110.1	PF00787.19;PF09325.5	PX domain;; Vps5 C terminal like
Gglean004111.1	PF00520.26	Ion transport protein
Gglean004113.1	PF02104.10	SURF1 family
Gglean004116.1	PF00249.26	Myb-like DNA-binding domain
Gglean004117.1	PF00445.13	Ribonuclease T2 family
Gglean004119.1	PF02146.12	Sir2 family
Gglean004121.1	PF00076.17;PF14259.1;PF13893.1	RNA recognition motif. (a.k.a. RRM, RBD, or RNP domain);; RNA recognition motif (a.k.a. RRM, RBD, or RNP domain);; RNA recognition motif. (a.k.a. RRM, RBD, or RNP domain)
Gglean004123.1	PF00587.20;PF02403.17	tRNA synthetase class II core domain (G, H, P, S and T);; Seryl-tRNA synthetase N-terminal domain
Gglean004124.1	PF00011.16	Hsp20/alpha crystallin family
Gglean004125.1	PF00790.14;PF03127.9	VHS domain;; GAT domain
Gglean004126.1	PF00011.16	Hsp20/alpha crystallin family
Gglean004127.1	PF13302.1;PF00583.19	Acetyltransferase (GNAT) domain;; Acetyltransferase (GNAT) family
Gglean004128.1	PF06687.7	SUR7/PalI family
Gglean004130.1	PF08513.6	LisH
Gglean004131.1	PF00400.27	WD domain, G-beta repeat
Gglean004132.1	PF01027.15	Inhibitor of apoptosis-promoting Bax1
Gglean004133.1	PF02714.10	Domain of unknown function DUF221
Gglean004134.1	PF00149.23	Calcineurin-like phosphoesterase
Gglean004137.1	PF01230.18;PF11969.3	HIT domain;; Scavenger mRNA decapping enzyme C-term binding
Gglean004142.1	PF13923.1;PF00097.20;PF13639.1	Zinc finger, C3HC4 type (RING finger);; Zinc finger, C3HC4 type (RING finger);; Ring finger domain
Gglean004144.1	PF02671.16;PF08295.7	Paired amphipathic helix repeat;; Sin3 family co-repressor
Gglean004147.1	PF00085.15;PF00578.16	Thioredoxin;; AhpC/TSA family
Gglean004150.1	PF00566.13	Rab-GTPase-TBC domain
Gglean004151.1	PF00576.16	HIUase/Transthyretin family
Gglean004152.1	PF08153.7;PF01926.18;PF00009.22;PF02421.13	NGP1NT (NUC091) domain;; 50S ribosome-binding GTPase;; Elongation factor Tu GTP binding domain;; Ferrous iron transport protein B
Gglean004153.1	PF04082.13;PF00172.13	Fungal specific transcription factor domain;; Fungal Zn(2)-Cys(6) binuclear cluster domain
Gglean004155.1	PF06544.7	Protein of unknown function (DUF1115)
Gglean004157.1	PF02284.11	Cytochrome c oxidase subunit Va
Gglean004158.1	PF13637.1;PF12796.2;PF13857.1;PF00023.25;PF13606.1	Ankyrin repeats (many copies);; Ankyrin repeats (3 copies);; Ankyrin repeats (many copies);; Ankyrin repeat;; Ankyrin repeat
Gglean004160.1	PF07690.11	Major Facilitator Superfamily
Gglean004162.1	PF13594.1;PF01979.15	Amidohydrolase;; Amidohydrolase family
Gglean004165.1	PF00590.15;PF13241.1;PF14823.1	Tetrapyrrole (Corrin/Porphyrin) Methylases;; Putative NAD(P)-binding;; Sirohaem biosynthesis protein C-terminal
Gglean004166.1	PF02463.14;PF06470.8;PF13304.1;PF13555.1	RecF/RecN/SMC N terminal domain;; SMC proteins Flexible Hinge Domain;; AAA domain;; P-loop containing region of AAA domain
Gglean004167.1	PF01566.13	Natural resistance-associated macrophage protein
Gglean004171.1	PF09728.4;PF11976.3	Myosin-like coiled-coil protein;; Ubiquitin-2 like Rad60 SUMO-like
Gglean004172.1	PF00150.13	Cellulase (glycosyl hydrolase family 5)
Gglean004173.1	PF09103.5	BRCA2, oligonucleotide/oligosaccharide-binding, domain 1
Gglean004174.1	PF05875.7	Ceramidase
Gglean004175.1	PF04410.9	Gar1/Naf1 RNA binding region
Gglean004176.1	PF15460.1	Something about silencing, SAS, complex subunit 4
Gglean004178.1	PF08596.5;PF00400.27	Lethal giant larvae(Lgl) like, C-terminal;; WD domain, G-beta repeat
Gglean004179.1	PF00026.18	Eukaryotic aspartyl protease
Gglean004181.1	PF03031.13;PF12738.2;PF00533.21	NLI interacting factor-like phosphatase;; twin BRCT domain;; BRCA1 C Terminus (BRCT) domain
Gglean004182.1	PF00172.13	Fungal Zn(2)-Cys(6) binuclear cluster domain
Gglean004183.1	PF00118.19	TCP-1/cpn60 chaperonin family
Gglean004184.1	PF07690.11	Major Facilitator Superfamily
Gglean004185.1	PF07690.11	Major Facilitator Superfamily
Gglean004186.1	PF04000.10	Sas10/Utp3/C1D family
Gglean004187.1	PF13813.1	Membrane bound O-acyl transferase family
Gglean004188.1	PF00069.20;PF07714.12;PF01636.18	Protein kinase domain;; Protein tyrosine kinase;; Phosphotransferase enzyme family
Gglean004189.1	PF01602.15;PF08752.5;PF13646.1	Adaptin N terminal region;; Coatomer gamma subunit appendage platform subdomain;; HEAT repeats
Gglean004190.1	PF03630.9	Fumble
Gglean004191.1	PF00046.24;PF05920.6	Homeobox domain;; Homeobox KN domain
Gglean004193.1	PF00463.16;PF13714.1	Isocitrate lyase family;; Phosphoenolpyruvate phosphomutase
Gglean004195.1	PF04118.9	Dopey, N-terminal
Gglean004196.1	PF01061.19;PF00005.22;PF06422.7;PF02492.14	ABC-2 type transporter;; ABC transporter;; CDR ABC transporter;; CobW/HypB/UreG, nucleotide-binding domain
Gglean004197.1	PF00262.13;PF00009.22;PF03764.13;PF00679.19;PF03144.20;PF01926.18	Calreticulin family;; Elongation factor Tu GTP binding domain;; Elongation factor G, domain IV;; Elongation factor G C-terminus;; Elongation factor Tu domain 2;; 50S ribosome-binding GTPase
Gglean004200.1	PF00617.14;PF00018.23;PF00618.15;PF07653.12;PF14604.1	RasGEF domain;; SH3 domain;; RasGEF N-terminal motif;; Variant SH3 domain;; Variant SH3 domain
Gglean004202.1	PF00076.17;PF13893.1	RNA recognition motif. (a.k.a. RRM, RBD, or RNP domain);; RNA recognition motif. (a.k.a. RRM, RBD, or RNP domain)
Gglean004204.1	PF00348.12	Polyprenyl synthetase
Gglean004205.1	PF05699.9	hAT family C-terminal dimerisation region
Gglean004208.1	PF10309.4	Protein of unknown function (DUF2414)
Gglean004210.1	PF13414.1;PF07719.12;PF00515.23	TPR repeat;; Tetratricopeptide repeat;; Tetratricopeptide repeat
Gglean004215.1	PF10296.4	Putative integral membrane protein conserved region (DUF2404)
Gglean004219.1	PF04180.9	Low temperature viability protein
Gglean004221.1	PF01399.22;PF10075.4	PCI domain;; COP9 signalosome, subunit CSN8
Gglean004222.1	PF00687.16	Ribosomal protein L1p/L10e family
Gglean004223.1	PF00439.20;PF01433.15	Bromodomain;; Peptidase family M1
Gglean004226.1	PF00346.14	Respiratory-chain NADH dehydrogenase, 49 Kd subunit
Gglean004227.1	PF00462.19	Glutaredoxin
Gglean004228.1	PF14327.1;PF14304.1	Hinge domain of cleavage stimulation factor subunit 2;; Transcription termination and cleavage factor C-terminal
Gglean004229.1	PF01602.15;PF14806.1;PF07718.7;PF13646.1;PF02985.17	Adaptin N terminal region;; Coatomer beta subunit appendage platform;; Coatomer beta C-terminal region;; HEAT repeats;; HEAT repeat
Gglean004230.1	PF02133.10	Permease for cytosine/purines, uracil, thiamine, allantoin
Gglean004231.1	PF13415.1;PF13418.1;PF13854.1;PF13964.1;PF01344.20;PF07646.10	Galactose oxidase, central domain;; Galactose oxidase, central domain;; Kelch motif;; Kelch motif;; Kelch motif;; Kelch motif
Gglean004232.1	PF03372.18	Endonuclease/Exonuclease/phosphatase family
Gglean004233.1	PF01872.12	RibD C-terminal domain
Gglean004236.1	PF01872.12	RibD C-terminal domain
Gglean004237.1	PF00621.15	RhoGEF domain
Gglean004238.1	PF01063.14	Aminotransferase class IV
Gglean004241.1	PF12352.3	Snare region anchored in the vesicle membrane C-terminus
Gglean004242.1	PF02475.11	Met-10+ like-protein
Gglean004245.1	PF00153.22	Mitochondrial carrier protein
Gglean004248.1	PF06110.6	Eukaryotic protein of unknown function (DUF953)
Gglean004249.1	PF01425.16	Amidase
Gglean004250.1	PF01425.16	Amidase
Gglean004252.1	PF07978.8	NIPSNAP
Gglean004253.1	PF00250.13	Fork head domain
Gglean004254.1	PF00400.27;PF08625.6	WD domain, G-beta repeat;; Utp13 specific WD40 associated domain
Gglean004259.1	PF13639.1;PF12678.2;PF14634.1;PF13920.1;PF13923.1;PF00097.20;PF12861.2	Ring finger domain;; RING-H2 zinc finger;; zinc-RING finger domain;; Zinc finger, C3HC4 type (RING finger);; Zinc finger, C3HC4 type (RING finger);; Zinc finger, C3HC4 type (RING finger);; Anaphase-promoting complex subunit 11 RING-H2 finger
Gglean004260.1	PF02252.13;PF02251.13	Proteasome activator pa28 beta subunit;; Proteasome activator pa28 alpha subunit
Gglean004261.1	PF00067.17	Cytochrome P450
Gglean004264.1	PF00113.17;PF03952.11	Enolase, C-terminal TIM barrel domain;; Enolase, N-terminal domain
Gglean004265.1	PF00113.17	Enolase, C-terminal TIM barrel domain
Gglean004269.1	PF03372.18;PF14529.1	Endonuclease/Exonuclease/phosphatase family;; Endonuclease-reverse transcriptase
Gglean004270.1	PF00096.21;PF13894.1;PF13465.1	Zinc finger, C2H2 type;; C2H2-type zinc finger;; Zinc-finger double domain
Gglean004272.1	PF02668.11	Taurine catabolism dioxygenase TauD, TfdA family
Gglean004273.1	PF03828.14;PF01909.18	Cid1 family poly A polymerase;; Nucleotidyltransferase domain
Gglean004276.1	PF01157.13	Ribosomal protein L21e
Gglean004278.1	PF03370.8	Putative phosphatase regulatory subunit
Gglean004279.1	PF00046.24;PF05920.6	Homeobox domain;; Homeobox KN domain
Gglean004282.1	PF00181.18	Ribosomal Proteins L2, RNA binding domain
Gglean004283.1	PF06068.8;PF00004.24;PF05496.7	TIP49 C-terminus;; ATPase family associated with various cellular activities (AAA);; Holliday junction DNA helicase ruvB N-terminus
Gglean004287.1	PF00312.17	Ribosomal protein S15
Gglean004289.1	PF01778.12	Ribosomal L28e protein family
Gglean004290.1	PF00650.15	CRAL/TRIO domain
Gglean004291.1	PF00891.13	O-methyltransferase
Gglean004292.1	PF00891.13	O-methyltransferase
Gglean004293.1	PF14033.1	Protein of unknown function (DUF4246)
Gglean004294.1	PF04124.7	Dor1-like family
Gglean004296.1	PF00083.19;PF07690.11	Sugar (and other) transporter;; Major Facilitator Superfamily
Gglean004299.1	PF00503.15;PF00025.16	G-protein alpha subunit;; ADP-ribosylation factor family
Gglean004300.1	PF01042.16	Endoribonuclease L-PSP
Gglean004303.1	PF11957.3	THO complex subunit 1 transcription elongation factor
Gglean004304.1	PF01370.16;PF13950.1;PF04321.12;PF01073.14;PF00106.20;PF02719.10;PF07993.7;PF08659.5	NAD dependent epimerase/dehydratase family;; UDP-glucose 4-epimerase C-term subunit;; RmlD substrate binding domain;; 3-beta hydroxysteroid dehydrogenase/isomerase family;; short chain dehydrogenase;; Polysaccharide biosynthesis protein;; Male sterility protein;; KR domain
Gglean004305.1	PF01370.16;PF13950.1;PF04321.12;PF01073.14;PF02719.10	NAD dependent epimerase/dehydratase family;; UDP-glucose 4-epimerase C-term subunit;; RmlD substrate binding domain;; 3-beta hydroxysteroid dehydrogenase/isomerase family;; Polysaccharide biosynthesis protein
Gglean004306.1	PF00083.19;PF07690.11	Sugar (and other) transporter;; Major Facilitator Superfamily
Gglean004307.1	PF08655.5	DASH complex subunit Ask1
Gglean004309.1	PF01485.16;PF00097.20	IBR domain;; Zinc finger, C3HC4 type (RING finger)
Gglean004312.1	PF08155.6;PF06858.9;PF01926.18;PF02421.13	NOGCT (NUC087) domain;; Nucleolar GTP-binding protein 1 (NOG1);; 50S ribosome-binding GTPase;; Ferrous iron transport protein B
Gglean004313.1	PF00153.22	Mitochondrial carrier protein
Gglean004314.1	PF00755.15	Choline/Carnitine o-acyltransferase
Gglean004315.1	PF04136.10	Sec34-like family
Gglean004316.1	PF01424.17;PF01585.18;PF12656.2	R3H domain;; G-patch domain;; DExH-box splicing factor binding site
Gglean004317.1	PF00106.20;PF08659.5;PF01370.16	short chain dehydrogenase;; KR domain;; NAD dependent epimerase/dehydratase family
Gglean004321.1	PF04433.12;PF00249.26	SWIRM domain;; Myb-like DNA-binding domain
Gglean004322.1	PF00293.23;PF09296.6	NUDIX domain;; NADH pyrophosphatase-like rudimentary NUDIX domain
Gglean004323.1	PF00650.15	CRAL/TRIO domain
Gglean004324.1	PF13894.1;PF00096.21	C2H2-type zinc finger;; Zinc finger, C2H2 type
Gglean004326.1	PF07716.10;PF00170.16	Basic region leucine zipper;; bZIP transcription factor
Gglean004328.1	PF09729.4	Gti1/Pac2 family
Gglean004330.1	PF09729.4	Gti1/Pac2 family
Gglean004332.1	PF03153.8	Transcription factor IIA, alpha/beta subunit
Gglean004333.1	PF12955.2	Domain of unknown function (DUF3844)
Gglean004334.1	PF00026.18;PF14543.1	Eukaryotic aspartyl protease;; Xylanase inhibitor N-terminal
Gglean004335.1	PF00137.16	ATP synthase subunit C
Gglean004336.1	PF00654.15;PF00571.23	Voltage gated chloride channel;; CBS domain
Gglean004337.1	PF13358.1	DDE superfamily endonuclease
Gglean004339.1	PF02184.11;PF13428.1;PF14559.1;PF13432.1;PF07719.12;PF13414.1;PF05843.9;PF13431.1;PF13424.1;PF13176.1;PF13181.1;PF14938.1;PF13429.1;PF00515.23	HAT (Half-A-TPR) repeat;; Tetratricopeptide repeat;; Tetratricopeptide repeat;; Tetratricopeptide repeat;; Tetratricopeptide repeat;; TPR repeat;; Suppressor of forked protein (Suf);; Tetratricopeptide repeat;; Tetratricopeptide repeat;; Tetratricopeptide repeat;; Tetratricopeptide repeat;; Soluble NSF attachment protein, SNAP;; Tetratricopeptide repeat;; Tetratricopeptide repeat
Gglean004340.1	PF04082.13;PF00172.13	Fungal specific transcription factor domain;; Fungal Zn(2)-Cys(6) binuclear cluster domain
Gglean004341.1	PF13515.1;PF04632.7;PF10334.4;PF11744.3	Fusaric acid resistance protein-like;; Fusaric acid resistance protein family;; Protein of unknown function (DUF2421);; Aluminium activated malate transporter
Gglean004342.1	PF00173.23	Cytochrome b5-like Heme/Steroid binding domain
Gglean004343.1	PF00004.24	ATPase family associated with various cellular activities (AAA)
Gglean004344.1	PF00503.15;PF00025.16;PF04670.7	G-protein alpha subunit;; ADP-ribosylation factor family;; Gtr1/RagA G protein conserved region
Gglean004345.1	PF12799.2;PF00481.16;PF13855.1;PF00560.28;PF00211.15;PF13504.1;PF00788.18;PF08509.6	Leucine Rich repeats (2 copies);; Protein phosphatase 2C;; Leucine rich repeat;; Leucine Rich Repeat;; Adenylate and Guanylate cyclase catalytic domain;; Leucine rich repeat;; Ras association (RalGDS/AF-6) domain;; Adenylate cyclase G-alpha binding domain
Gglean004346.1	PF04573.7	Signal peptidase subunit
Gglean004347.1	PF00172.13	Fungal Zn(2)-Cys(6) binuclear cluster domain
Gglean004349.1	PF03188.11	Eukaryotic cytochrome b561
Gglean004350.1	PF01636.18	Phosphotransferase enzyme family
Gglean004351.1	PF01182.15	Glucosamine-6-phosphate isomerases/6-phosphogluconolactonase
Gglean004352.1	PF13632.1;PF13641.1	Glycosyl transferase family group 2;; Glycosyltransferase like family 2
Gglean004353.1	PF13383.1;PF05050.7	Methyltransferase domain;; Methyltransferase FkbM domain
Gglean004362.1	PF02373.17	JmjC domain, hydroxylase
Gglean004367.1	PF07993.7	Male sterility protein
Gglean004368.1	PF07993.7	Male sterility protein
Gglean004370.1	PF12937.2	F-box-like
Gglean004371.1	PF00106.20	short chain dehydrogenase
Gglean004374.1	PF01636.18	Phosphotransferase enzyme family
Gglean004375.1	PF00107.21;PF13602.1;PF08240.7	Zinc-binding dehydrogenase;; Zinc-binding dehydrogenase;; Alcohol dehydrogenase GroES-like domain
Gglean004376.1	PF06472.10	ABC transporter transmembrane region 2
Gglean004380.1	PF12585.3	Protein of unknown function (DUF3759)
Gglean004397.1	PF07999.6	Retrotransposon hot spot protein
Gglean004399.1	PF02133.10	Permease for cytosine/purines, uracil, thiamine, allantoin
Gglean004400.1	PF06472.10;PF00005.22	ABC transporter transmembrane region 2;; ABC transporter
Gglean004401.1	PF01424.17	R3H domain
Gglean004402.1	PF10513.4	Enhancer of polycomb-like
Gglean004405.1	PF00096.21	Zinc finger, C2H2 type
Gglean004407.1	PF02268.11;PF02751.9	Transcription initiation factor IIA, gamma subunit, helical domain;; Transcription initiation factor IIA, gamma subunit
Gglean004408.1	PF01425.16	Amidase
Gglean004409.1	PF06032.7;PF01968.13;PF05378.8;PF06406.6	Protein of unknown function (DUF917);; Hydantoinase/oxoprolinase;; Hydantoinase/oxoprolinase N-terminal region;; StbA protein
Gglean004412.1	PF00078.22	Reverse transcriptase (RNA-dependent DNA polymerase)
Gglean004419.1	PF00324.16;PF13520.1	Amino acid permease;; Amino acid permease
Gglean004420.1	PF02574.11	Homocysteine S-methyltransferase
Gglean004421.1	PF00318.15	Ribosomal protein S2
Gglean004422.1	PF00069.20;PF07714.12	Protein kinase domain;; Protein tyrosine kinase
Gglean004423.1	PF00069.20;PF07714.12	Protein kinase domain;; Protein tyrosine kinase
Gglean004426.1	PF05653.9;PF00892.15	Magnesium transporter NIPA;; EamA-like transporter family
Gglean004427.1	PF01553.16	Acyltransferase
Gglean004430.1	PF05918.6	Apoptosis inhibitory protein 5 (API5)
Gglean004435.1	PF00026.18;PF00026.18	Eukaryotic aspartyl protease;; Eukaryotic aspartyl protease
Gglean004440.1	PF12937.2	F-box-like
Gglean004444.1	PF01406.14;PF09334.6;PF00133.17;PF09190.6	tRNA synthetases class I (C) catalytic domain;; tRNA synthetases class I (M);; tRNA synthetases class I (I, L, M and V);; DALR domain
Gglean004445.1	PF01590.21	GAF domain
Gglean004446.1	PF08718.6	Glycolipid transfer protein (GLTP)
Gglean004447.1	PF09729.4	Gti1/Pac2 family
Gglean004448.1	PF00642.19;PF13920.1;PF13923.1;PF14634.1;PF00097.20	Zinc finger C-x8-C-x5-C-x3-H type (and similar);; Zinc finger, C3HC4 type (RING finger);; Zinc finger, C3HC4 type (RING finger);; zinc-RING finger domain;; Zinc finger, C3HC4 type (RING finger)
Gglean004450.1	PF09273.6;PF00856.23	Rubisco LSMT substrate-binding;; SET domain
Gglean004452.1	PF00291.20	Pyridoxal-phosphate dependent enzyme
Gglean004453.1	PF13414.1;PF07719.12;PF00515.23;PF13424.1;PF13432.1;PF14559.1;PF13428.1;PF12895.2;PF13181.1;PF13176.1;PF13174.1;PF13374.1;PF13431.1;PF07721.9	TPR repeat;; Tetratricopeptide repeat;; Tetratricopeptide repeat;; Tetratricopeptide repeat;; Tetratricopeptide repeat;; Tetratricopeptide repeat;; Tetratricopeptide repeat;; Anaphase-promoting complex, cyclosome, subunit 3;; Tetratricopeptide repeat;; Tetratricopeptide repeat;; Tetratricopeptide repeat;; Tetratricopeptide repeat;; Tetratricopeptide repeat;; Tetratricopeptide repeat
Gglean004454.1	PF13380.1	CoA binding domain
Gglean004457.1	PF00704.23	Glycosyl hydrolases family 18
Gglean004461.1	PF00078.22	Reverse transcriptase (RNA-dependent DNA polymerase)
Gglean004462.1	PF00075.19	RNase H
Gglean004464.1	PF09753.4	Membrane fusion protein Use1
Gglean004466.1	PF12937.2	F-box-like
Gglean004467.1	PF00172.13	Fungal Zn(2)-Cys(6) binuclear cluster domain
Gglean004470.1	PF00069.20	Protein kinase domain
Gglean004473.1	PF00557.19;PF01321.13	Metallopeptidase family M24;; Creatinase/Prolidase N-terminal domain
Gglean004475.1	PF00503.15;PF00025.16	G-protein alpha subunit;; ADP-ribosylation factor family
Gglean004478.1	PF00152.15;PF01409.15;PF01336.20	tRNA synthetases class II (D, K and N);; tRNA synthetases class II core domain (F);; OB-fold nucleic acid binding domain
Gglean004479.1	PF00012.15	Hsp70 protein
Gglean004480.1	PF13641.1;PF00535.21;PF13506.1	Glycosyltransferase like family 2;; Glycosyl transferase family 2;; Glycosyl transferase family 21
Gglean004483.1	PF00125.19;PF02969.12	Core histone H2A/H2B/H3/H4;; TATA box binding protein associated factor (TAF)
Gglean004487.1	PF00125.19	Core histone H2A/H2B/H3/H4
Gglean004488.1	PF14214.1	Helitron helicase-like domain at N-terminus
Gglean004489.1	PF05970.9;PF13604.1	PIF1-like helicase;; AAA domain
Gglean004493.1	PF00078.22	Reverse transcriptase (RNA-dependent DNA polymerase)
Gglean004495.1	PF13450.1;PF01266.19;PF00890.19;PF07992.9;PF01134.17	NAD(P)-binding Rossmann-like domain;; FAD dependent oxidoreductase;; FAD binding domain;; Pyridine nucleotide-disulphide oxidoreductase;; Glucose inhibited division protein A
Gglean004504.1	PF01494.14;PF13450.1;PF04820.9	FAD binding domain;; NAD(P)-binding Rossmann-like domain;; Tryptophan halogenase
Gglean004505.1	PF01554.13;PF14667.1	MatE;; Polysaccharide biosynthesis C-terminal domain
Gglean004506.1	PF00646.28	F-box domain
Gglean004507.1	PF07690.11	Major Facilitator Superfamily
Gglean004508.1	PF07690.11	Major Facilitator Superfamily
Gglean004512.1	PF12353.3;PF00076.17;PF14259.1;PF13893.1	Eukaryotic translation initiation factor 3 subunit G;; RNA recognition motif. (a.k.a. RRM, RBD, or RNP domain);; RNA recognition motif (a.k.a. RRM, RBD, or RNP domain);; RNA recognition motif. (a.k.a. RRM, RBD, or RNP domain)
Gglean004514.1	PF00069.20;PF07714.12;PF14531.1	Protein kinase domain;; Protein tyrosine kinase;; Kinase-like
Gglean004515.1	PF00069.20;PF07714.12	Protein kinase domain;; Protein tyrosine kinase
Gglean004516.1	PF07814.8	Wings apart-like protein regulation of heterochromatin
Gglean004519.1	PF12706.2;PF00753.22	Beta-lactamase superfamily domain;; Metallo-beta-lactamase superfamily
Gglean004521.1	PF00856.23	SET domain
Gglean004522.1	PF00069.20;PF07714.12	Protein kinase domain;; Protein tyrosine kinase
Gglean004523.1	PF00069.20;PF07714.12	Protein kinase domain;; Protein tyrosine kinase
Gglean004524.1	PF03022.11	Major royal jelly protein
Gglean004525.1	PF00069.20;PF07714.12	Protein kinase domain;; Protein tyrosine kinase
Gglean004529.1	PF01425.16	Amidase
Gglean004530.1	PF12585.3	Protein of unknown function (DUF3759)
Gglean004531.1	PF13417.1;PF13409.1;PF13410.1	Glutathione S-transferase, N-terminal domain;; Glutathione S-transferase, N-terminal domain;; Glutathione S-transferase, C-terminal domain
Gglean004537.1	PF00637.15	Region in Clathrin and VPS
Gglean004538.1	PF00637.15	Region in Clathrin and VPS
Gglean004544.1	PF01070.13	FMN-dependent dehydrogenase
Gglean004546.1	PF13639.1;PF13923.1;PF13920.1;PF00097.20;PF07992.9;PF13445.1;PF13738.1;PF14634.1;PF00743.14	Ring finger domain;; Zinc finger, C3HC4 type (RING finger);; Zinc finger, C3HC4 type (RING finger);; Zinc finger, C3HC4 type (RING finger);; Pyridine nucleotide-disulphide oxidoreductase;; RING-type zinc-finger;; Pyridine nucleotide-disulphide oxidoreductase;; zinc-RING finger domain;; Flavin-binding monooxygenase-like
Gglean004548.1	PF13838.1;PF01394.15	Clathrin-H-link;; Clathrin propeller repeat
Gglean004549.1	PF00637.15	Region in Clathrin and VPS
Gglean004550.1	PF00637.15	Region in Clathrin and VPS
Gglean004551.1	PF00637.15	Region in Clathrin and VPS
Gglean004555.1	PF07859.8;PF10340.4	alpha/beta hydrolase fold;; Protein of unknown function (DUF2424)
Gglean004559.1	PF08572.5;PF06544.7	pre-mRNA processing factor 3 (PRP3);; Protein of unknown function (DUF1115)
Gglean004561.1	PF05183.7	RNA dependent RNA polymerase
Gglean004563.1	PF00503.15;PF00025.16	G-protein alpha subunit;; ADP-ribosylation factor family
Gglean004564.1	PF00106.20	short chain dehydrogenase
Gglean004568.1	PF01532.15	Glycosyl hydrolase family 47
Gglean004569.1	PF10356.4;PF04471.7	Protein of unknown function (DUF2034);; Restriction endonuclease
Gglean004571.1	PF00487.19;PF00173.23	Fatty acid desaturase;; Cytochrome b5-like Heme/Steroid binding domain
Gglean004575.1	PF01765.14	Ribosome recycling factor
Gglean004576.1	PF00106.20;PF08659.5;PF08643.5	short chain dehydrogenase;; KR domain;; Fungal family of unknown function (DUF1776)
Gglean004583.1	PF11022.3	Protein of unknown function (DUF2611)
Gglean004585.1	PF05221.12;PF00670.16;PF02826.14	S-adenosyl-L-homocysteine hydrolase;; S-adenosyl-L-homocysteine hydrolase, NAD binding domain;; D-isomer specific 2-hydroxyacid dehydrogenase, NAD binding domain
Gglean004588.1	PF00106.20;PF08659.5	short chain dehydrogenase;; KR domain
Gglean004590.1	PF05383.12	La domain
Gglean004591.1	PF00503.15;PF00025.16	G-protein alpha subunit;; ADP-ribosylation factor family
Gglean004592.1	PF01679.12	Proteolipid membrane potential modulator
Gglean004601.1	PF01485.16;PF00642.19;PF00076.17;PF13923.1;PF15227.1;PF13639.1;PF00097.20;PF13893.1	IBR domain;; Zinc finger C-x8-C-x5-C-x3-H type (and similar);; RNA recognition motif. (a.k.a. RRM, RBD, or RNP domain);; Zinc finger, C3HC4 type (RING finger);; zinc finger of C3HC4-type, RING;; Ring finger domain;; Zinc finger, C3HC4 type (RING finger);; RNA recognition motif. (a.k.a. RRM, RBD, or RNP domain)
Gglean004602.1	PF02178.14	AT hook motif
Gglean004603.1	PF00153.22	Mitochondrial carrier protein
Gglean004604.1	PF00106.20;PF08659.5;PF13561.1;PF13460.1;PF01370.16;PF08643.5	short chain dehydrogenase;; KR domain;; Enoyl-(Acyl carrier protein) reductase;; NADH(P)-binding;; NAD dependent epimerase/dehydratase family;; Fungal family of unknown function (DUF1776)
Gglean004606.1	PF00487.19;PF00173.23	Fatty acid desaturase;; Cytochrome b5-like Heme/Steroid binding domain
Gglean004609.1	PF00176.18;PF13639.1;PF13923.1;PF00271.26;PF00097.20;PF13920.1;PF13445.1;PF14634.1	SNF2 family N-terminal domain;; Ring finger domain;; Zinc finger, C3HC4 type (RING finger);; Helicase conserved C-terminal domain;; Zinc finger, C3HC4 type (RING finger);; Zinc finger, C3HC4 type (RING finger);; RING-type zinc-finger;; zinc-RING finger domain
Gglean004610.1	PF10914.3	Protein of unknown function (DUF2781)
Gglean004612.1	PF00400.27	WD domain, G-beta repeat
Gglean004613.1	PF04777.8	Erv1 / Alr family
Gglean004616.1	PF01070.13;PF00173.23;PF03060.10	FMN-dependent dehydrogenase;; Cytochrome b5-like Heme/Steroid binding domain;; Nitronate monooxygenase
Gglean004617.1	PF03637.12	Mob1/phocein family
Gglean004618.1	PF00252.13	Ribosomal protein L16p/L10e
Gglean004619.1	PF06058.8	Dcp1-like decapping family
Gglean004620.1	PF04577.9	Protein of unknown function (DUF563)
Gglean004621.1	PF10294.4	Putative methyltransferase
Gglean004623.1	PF00428.14	60s Acidic ribosomal protein
Gglean004631.1	PF04088.8;PF07653.12;PF00018.23	Peroxin 13, N-terminal region;; Variant SH3 domain;; SH3 domain
Gglean004640.1	PF10021.4	Uncharacterized protein conserved in bacteria (DUF2263)
Gglean004641.1	PF00282.14	Pyridoxal-dependent decarboxylase conserved domain
Gglean004642.1	PF00226.26	DnaJ domain
Gglean004643.1	PF00307.26;PF11971.3	Calponin homology (CH) domain;; CAMSAP CH domain
Gglean004648.1	PF00487.19;PF11960.3	Fatty acid desaturase;; Domain of unknown function (DUF3474)
Gglean004649.1	PF06964.7	Alpha-L-arabinofuranosidase C-terminus
Gglean004651.1	PF00653.16;PF07967.8	Inhibitor of Apoptosis domain;; C3HC zinc finger-like
Gglean004652.1	PF05422.7	Stress-activated map kinase interacting protein 1 (SIN1)
Gglean004653.1	PF11969.3;PF05652.7	Scavenger mRNA decapping enzyme C-term binding;; Scavenger mRNA decapping enzyme (DcpS) N-terminal
Gglean004654.1	PF14259.1	RNA recognition motif (a.k.a. RRM, RBD, or RNP domain)
Gglean004655.1	PF03022.11	Major royal jelly protein
Gglean004657.1	PF00850.14	Histone deacetylase domain
Gglean004659.1	PF01103.18	Surface antigen
Gglean004660.1	PF03169.10	OPT oligopeptide transporter protein
Gglean004664.1	PF00285.16;PF00549.14;PF02629.14;PF08442.5	Citrate synthase;; CoA-ligase;; CoA binding domain;; ATP-grasp domain
Gglean004665.1	PF06912.6	Protein of unknown function (DUF1275)
Gglean004667.1	PF12706.2	Beta-lactamase superfamily domain
Gglean004669.1	PF00106.20;PF08659.5	short chain dehydrogenase;; KR domain
Gglean004670.1	PF10598.4;PF08083.6	RNA recognition motif of the spliceosomal PrP8;; PROCN (NUC071) domain
Gglean004671.1	PF02373.17	JmjC domain, hydroxylase
Gglean004677.1	PF00076.17	RNA recognition motif. (a.k.a. RRM, RBD, or RNP domain)
Gglean004683.1	PF00155.16;PF01041.12;PF01053.15;PF01212.16	Aminotransferase class I and II;; DegT/DnrJ/EryC1/StrS aminotransferase family;; Cys/Met metabolism PLP-dependent enzyme;; Beta-eliminating lyase
Gglean004684.1	PF00149.23	Calcineurin-like phosphoesterase
Gglean004685.1	PF00128.19;PF09260.6	Alpha amylase, catalytic domain;; Domain of unknown function (DUF1966)
Gglean004688.1	PF13621.1	Cupin-like domain
Gglean004690.1	PF00067.17	Cytochrome P450
Gglean004695.1	PF00009.22;PF09173.6;PF03144.20	Elongation factor Tu GTP binding domain;; Initiation factor eIF2 gamma, C terminal;; Elongation factor Tu domain 2
Gglean004697.1	PF05347.10;PF13232.1	Complex 1 protein (LYR family);; Complex1_LYR-like
Gglean004698.1	PF07103.6	Protein of unknown function (DUF1365)
Gglean004699.1	PF00856.23	SET domain
Gglean004700.1	PF08236.6	SRI (Set2 Rpb1 interacting) domain
Gglean004702.1	PF08146.7;PF12397.3	BP28CT (NUC211) domain;; U3 small nucleolar RNA-associated protein 10
Gglean004704.1	PF07524.8	Bromodomain associated
Gglean004706.1	PF00412.17	LIM domain
Gglean004707.1	PF08190.7	pre-RNA processing PIH1/Nop17
Gglean004709.1	PF00793.15	DAHP synthetase I family
Gglean004711.1	PF02586.9	Uncharacterised ACR, COG2135
Gglean004714.1	PF00933.16	Glycosyl hydrolase family 3 N terminal domain
Gglean004715.1	PF00790.14;PF03127.9	VHS domain;; GAT domain
Gglean004717.1	PF00076.17;PF14259.1	RNA recognition motif. (a.k.a. RRM, RBD, or RNP domain);; RNA recognition motif (a.k.a. RRM, RBD, or RNP domain)
Gglean004718.1	PF02383.13	SacI homology domain
Gglean004719.1	PF01423.17	LSM domain
Gglean004722.1	PF00069.20;PF07714.12	Protein kinase domain;; Protein tyrosine kinase
Gglean004723.1	PF03828.14;PF01909.18	Cid1 family poly A polymerase;; Nucleotidyltransferase domain
Gglean004725.1	PF02992.9	Transposase family tnp2
Gglean004726.1	PF00867.13;PF00752.12	XPG I-region;; XPG N-terminal domain
Gglean004727.1	PF00069.20;PF07714.12;PF00130.17	Protein kinase domain;; Protein tyrosine kinase;; Phorbol esters/diacylglycerol binding domain (C1 domain)
Gglean004728.1	PF11894.3	Protein of unknown function (DUF3414)
Gglean004731.1	PF00176.18;PF00271.26	SNF2 family N-terminal domain;; Helicase conserved C-terminal domain
Gglean004732.1	PF03715.8	Noc2p family
Gglean004734.1	PF04030.9;PF01565.18	D-arabinono-1,4-lactone oxidase;; FAD binding domain
Gglean004735.1	PF00179.21	Ubiquitin-conjugating enzyme
Gglean004736.1	PF09370.5	TIM-barrel signal transduction protein
Gglean004738.1	PF07690.11	Major Facilitator Superfamily
Gglean004740.1	PF10275.4	Peptidase C65 Otubain
Gglean004741.1	PF00505.14;PF09011.5	HMG (high mobility group) box;; HMG-box domain
Gglean004742.1	PF01554.13	MatE
Gglean004743.1	PF01063.14	Aminotransferase class IV
Gglean004745.1	PF00179.21	Ubiquitin-conjugating enzyme
Gglean004746.1	PF00153.22	Mitochondrial carrier protein
Gglean004748.1	PF01663.17;PF00884.18	Type I phosphodiesterase / nucleotide pyrophosphatase;; Sulfatase
Gglean004749.1	PF04987.9	Phosphatidylinositolglycan class N (PIG-N)
Gglean004750.1	PF02200.11;PF00096.21;PF13894.1;PF13465.1	STE like transcription factor;; Zinc finger, C2H2 type;; C2H2-type zinc finger;; Zinc-finger double domain
Gglean004751.1	PF02996.12	Prefoldin subunit
Gglean004752.1	PF00176.18;PF13639.1;PF13923.1;PF13920.1;PF14634.1;PF00097.20	SNF2 family N-terminal domain;; Ring finger domain;; Zinc finger, C3HC4 type (RING finger);; Zinc finger, C3HC4 type (RING finger);; zinc-RING finger domain;; Zinc finger, C3HC4 type (RING finger)
Gglean004756.1	PF00076.17;PF14259.1;PF13893.1;PF11608.3	RNA recognition motif. (a.k.a. RRM, RBD, or RNP domain);; RNA recognition motif (a.k.a. RRM, RBD, or RNP domain);; RNA recognition motif. (a.k.a. RRM, RBD, or RNP domain);; Limkain b1
Gglean004757.1	PF00400.27;PF08662.6	WD domain, G-beta repeat;; Eukaryotic translation initiation factor eIF2A
Gglean004758.1	PF01399.22	PCI domain
Gglean004759.1	PF00249.26;PF13921.1	Myb-like DNA-binding domain;; Myb-like DNA-binding domain
Gglean004762.1	PF12937.2;PF00646.28	F-box-like;; F-box domain
Gglean004763.1	PF00400.27;PF11715.3	WD domain, G-beta repeat;; Nucleoporin Nup120/160
Gglean004764.1	PF00067.17	Cytochrome P450
Gglean004766.1	PF02076.10	Pheromone A receptor
Gglean004767.1	PF00067.17	Cytochrome P450
Gglean004768.1	PF02076.10	Pheromone A receptor
Gglean004770.1	PF07690.11	Major Facilitator Superfamily
Gglean004771.1	PF01636.18;PF01163.17	Phosphotransferase enzyme family;; RIO1 family
Gglean004774.1	PF04157.11;PF11605.3;PF00641.13	EAP30/Vps36 family;; Vacuolar protein sorting protein 36 Vps36;; Zn-finger in Ran binding protein and others
Gglean004775.1	PF05486.7	Signal recognition particle 9 kDa protein (SRP9)
Gglean004776.1	PF01975.12	Survival protein SurE
Gglean004777.1	PF01416.15	tRNA pseudouridine synthase
Gglean004778.1	PF13418.1;PF13415.1;PF13854.1;PF01344.20;PF13964.1;PF07646.10	Galactose oxidase, central domain;; Galactose oxidase, central domain;; Kelch motif;; Kelch motif;; Kelch motif;; Kelch motif
Gglean004779.1	PF13594.1	Amidohydrolase
Gglean004781.1	PF06792.6	Uncharacterised protein family (UPF0261)
Gglean004782.1	PF00562.23;PF04563.10;PF04561.9;PF04560.15;PF04566.8;PF04565.11;PF04567.12	RNA polymerase Rpb2, domain 6;; RNA polymerase beta subunit;; RNA polymerase Rpb2, domain 2;; RNA polymerase Rpb2, domain 7;; RNA polymerase Rpb2, domain 4;; RNA polymerase Rpb2, domain 3;; RNA polymerase Rpb2, domain 5
Gglean004785.1	PF05063.9	MT-A70
Gglean004786.1	PF00133.17;PF09334.6;PF08264.8;PF01406.14	tRNA synthetases class I (I, L, M and V);; tRNA synthetases class I (M);; Anticodon-binding domain of tRNA;; tRNA synthetases class I (C) catalytic domain
Gglean004787.1	PF01237.13	Oxysterol-binding protein
Gglean004788.1	PF04178.7	Got1/Sft2-like family
Gglean004789.1	PF00583.19;PF08445.5;PF13673.1;PF13508.1;PF13523.1;PF13302.1;PF13527.1	Acetyltransferase (GNAT) family;; FR47-like protein;; Acetyltransferase (GNAT) domain;; Acetyltransferase (GNAT) domain;; Acetyltransferase (GNAT) domain;; Acetyltransferase (GNAT) domain;; Acetyltransferase (GNAT) domain
Gglean004790.1	PF00012.15;PF06723.8	Hsp70 protein;; MreB/Mbl protein
Gglean004791.1	PF13520.1;PF00324.16	Amino acid permease;; Amino acid permease
Gglean004792.1	PF03061.17	Thioesterase superfamily
Gglean004793.1	PF02145.10;PF03542.11	Rap/ran-GAP;; Tuberin
Gglean004795.1	PF01467.21	Cytidylyltransferase
Gglean004796.1	PF00350.18	Dynamin family
Gglean004798.1	PF00350.18	Dynamin family
Gglean004801.1	PF02985.17;PF13513.1;PF13646.1;PF03810.14;PF00514.18	HEAT repeat;; HEAT-like repeat;; HEAT repeats;; Importin-beta N-terminal domain;; Armadillo/beta-catenin-like repeat
Gglean004802.1	PF05362.8;PF00004.24;PF02190.11;PF07728.9;PF07724.9	Lon protease (S16) C-terminal proteolytic domain;; ATPase family associated with various cellular activities (AAA);; ATP-dependent protease La (LON) domain;; AAA domain (dynein-related subfamily);; AAA domain (Cdc48 subfamily)
Gglean004803.1	PF13646.1	HEAT repeats
Gglean004806.1	PF07969.6;PF13594.1	Amidohydrolase family;; Amidohydrolase
Gglean004807.1	PF07969.6;PF01979.15	Amidohydrolase family;; Amidohydrolase family
Gglean004808.1	PF00782.15;PF00581.15	Dual specificity phosphatase, catalytic domain;; Rhodanese-like domain
Gglean004810.1	PF01287.15	Eukaryotic elongation factor 5A hypusine, DNA-binding OB fold
Gglean004813.1	PF00069.20;PF07714.12	Protein kinase domain;; Protein tyrosine kinase
Gglean004814.1	PF00026.18;PF13650.1	Eukaryotic aspartyl protease;; Aspartyl protease
Gglean004815.1	PF00012.15	Hsp70 protein
Gglean004816.1	PF10540.4;PF00168.25	Munc13 (mammalian uncoordinated) homology domain;; C2 domain
Gglean004817.1	PF06870.7	A49-like RNA polymerase I associated factor
Gglean004818.1	PF06870.7	A49-like RNA polymerase I associated factor
Gglean004820.1	PF08236.6	SRI (Set2 Rpb1 interacting) domain
Gglean004821.1	PF04082.13;PF00172.13	Fungal specific transcription factor domain;; Fungal Zn(2)-Cys(6) binuclear cluster domain
Gglean004823.1	PF10252.4	Casein kinase substrate phosphoprotein PP28
Gglean004829.1	PF07534.11	TLD
Gglean004830.1	PF00617.14;PF00618.15	RasGEF domain;; RasGEF N-terminal motif
Gglean004831.1	PF00929.19	Exonuclease
Gglean004832.1	PF01485.16	IBR domain
Gglean004834.1	PF00400.27;PF11715.3	WD domain, G-beta repeat;; Nucleoporin Nup120/160
Gglean004843.1	PF00248.16	Aldo/keto reductase family
Gglean004844.1	PF12937.2	F-box-like
Gglean004847.1	PF02373.17	JmjC domain, hydroxylase
Gglean004848.1	PF01031.15	Dynamin central region
Gglean004860.1	PF04931.8	DNA polymerase phi
Gglean004861.1	PF07542.6	ATP12 chaperone protein
Gglean004862.1	PF13532.1	2OG-Fe(II) oxygenase superfamily
Gglean004863.1	PF02410.10	Oligomerisation domain
Gglean004865.1	PF13738.1;PF00743.14;PF13450.1;PF13454.1	Pyridine nucleotide-disulphide oxidoreductase;; Flavin-binding monooxygenase-like;; NAD(P)-binding Rossmann-like domain;; FAD-NAD(P)-binding
Gglean004867.1	PF12697.2;PF12695.2;PF00561.15	Alpha/beta hydrolase family;; Alpha/beta hydrolase family;; alpha/beta hydrolase fold
Gglean004868.1	PF01984.15	Double-stranded DNA-binding domain
Gglean004869.1	PF14570.1	RING/Ubox like zinc-binding domain
Gglean004871.1	PF13639.1;PF13920.1;PF00097.20;PF13923.1;PF14634.1;PF15227.1;PF04564.10	Ring finger domain;; Zinc finger, C3HC4 type (RING finger);; Zinc finger, C3HC4 type (RING finger);; Zinc finger, C3HC4 type (RING finger);; zinc-RING finger domain;; zinc finger of C3HC4-type, RING;; U-box domain
Gglean004876.1	PF13621.1;PF08007.7;PF02373.17	Cupin-like domain;; Cupin superfamily protein;; JmjC domain, hydroxylase
Gglean004879.1	PF02136.15	Nuclear transport factor 2 (NTF2) domain
Gglean004882.1	PF07470.8	Glycosyl Hydrolase Family 88
Gglean004883.1	PF00352.16	Transcription factor TFIID (or TATA-binding protein, TBP)
Gglean004884.1	PF00579.20	tRNA synthetases class I (W and Y)
Gglean004885.1	PF00364.17;PF02817.12	Biotin-requiring enzyme;; e3 binding domain
Gglean004887.1	PF02144.11	Repair protein Rad1/Rec1/Rad17
Gglean004888.1	PF00067.17	Cytochrome P450
Gglean004889.1	PF00067.17	Cytochrome P450
Gglean004891.1	PF07992.9;PF02852.17;PF00070.22;PF13738.1;PF12831.2;PF03486.9	Pyridine nucleotide-disulphide oxidoreductase;; Pyridine nucleotide-disulphide oxidoreductase, dimerisation domain;; Pyridine nucleotide-disulphide oxidoreductase;; Pyridine nucleotide-disulphide oxidoreductase;; FAD dependent oxidoreductase;; HI0933-like protein
Gglean004896.1	PF00400.27;PF13191.1;PF05729.7;PF07676.7	WD domain, G-beta repeat;; AAA ATPase domain;; NACHT domain;; WD40-like Beta Propeller Repeat
Gglean004898.1	PF07859.8;PF00135.23	alpha/beta hydrolase fold;; Carboxylesterase family
Gglean004899.1	PF12697.2	Alpha/beta hydrolase family
Gglean004901.1	PF02847.12;PF02854.14	MA3 domain;; MIF4G domain
Gglean004909.1	PF05336.8	Domain of unknown function (DUF718)
Gglean004910.1	PF06911.7	Senescence-associated protein
Gglean004912.1	PF01753.13	MYND finger
Gglean004913.1	PF00071.17;PF08477.8;PF00025.16	Ras family;; Miro-like protein;; ADP-ribosylation factor family
Gglean004914.1	PF00076.17	RNA recognition motif. (a.k.a. RRM, RBD, or RNP domain)
Gglean004916.1	PF03464.10;PF03465.10;PF03463.10	eRF1 domain 2;; eRF1 domain 3;; eRF1 domain 1
Gglean004918.1	PF01979.15;PF13147.1;PF13594.1;PF07969.6	Amidohydrolase family;; Amidohydrolase;; Amidohydrolase;; Amidohydrolase family
Gglean004919.1	PF00067.17	Cytochrome P450
Gglean004920.1	PF00406.17;PF05191.9	Adenylate kinase;; Adenylate kinase, active site lid
Gglean004922.1	PF01061.19;PF00005.22	ABC-2 type transporter;; ABC transporter
Gglean004924.1	PF00400.27;PF08662.6	WD domain, G-beta repeat;; Eukaryotic translation initiation factor eIF2A
Gglean004926.1	PF00069.20;PF07714.12	Protein kinase domain;; Protein tyrosine kinase
Gglean004927.1	PF07249.7	Cerato-platanin
Gglean004928.1	PF07249.7	Cerato-platanin
Gglean004930.1	PF00505.14	HMG (high mobility group) box
Gglean004932.1	PF08208.6	DNA-directed RNA polymerase I subunit RPA34.5
Gglean004933.1	PF10198.4	Histone acetyltransferases subunit 3
Gglean004935.1	PF00696.23;PF01472.15	Amino acid kinase family;; PUA domain
Gglean004936.1	PF13793.1;PF14572.1;PF00156.22	N-terminal domain of ribose phosphate pyrophosphokinase;; Phosphoribosyl synthetase-associated domain;; Phosphoribosyl transferase domain
Gglean004937.1	PF00850.14	Histone deacetylase domain
Gglean004939.1	PF00534.15;PF13579.1;PF13439.1	Glycosyl transferases group 1;; Glycosyl transferase 4-like domain;; Glycosyltransferase Family 4
Gglean004941.1	PF00487.19	Fatty acid desaturase
Gglean004942.1	PF06244.7	Protein of unknown function (DUF1014)
Gglean004943.1	PF04847.7	Calcipressin
Gglean004945.1	PF00817.15;PF11799.3;PF12738.2	impB/mucB/samB family;; impB/mucB/samB family C-terminal domain;; twin BRCT domain
Gglean004946.1	PF13489.1;PF13847.1;PF08242.7;PF08241.7;PF12847.2;PF13649.1;PF13659.1;PF01209.13;PF05175.9;PF01728.14	Methyltransferase domain;; Methyltransferase domain;; Methyltransferase domain;; Methyltransferase domain;; Methyltransferase domain;; Methyltransferase domain;; Methyltransferase domain;; ubiE/COQ5 methyltransferase family;; Methyltransferase small domain;; FtsJ-like methyltransferase
Gglean004947.1	PF08543.7;PF03070.11	Phosphomethylpyrimidine kinase;; TENA/THI-4/PQQC family
Gglean004948.1	PF00579.20	tRNA synthetases class I (W and Y)
Gglean004949.1	PF12513.3;PF00271.26	Mitochondrial degradasome RNA helicase subunit C terminal;; Helicase conserved C-terminal domain
Gglean004950.1	PF03770.11	Inositol polyphosphate kinase
Gglean004952.1	PF14604.1;PF00018.23;PF12763.2;PF00621.15;PF02205.15;PF07653.12;PF00169.24	Variant SH3 domain;; SH3 domain;; Cytoskeletal-regulatory complex EF hand;; RhoGEF domain;; WH2 motif;; Variant SH3 domain;; PH domain
Gglean004954.1	PF08293.6	Mitochondrial ribosomal subunit S27
Gglean004956.1	PF00067.17	Cytochrome P450
Gglean004958.1	PF04112.8	Mak10 subunit, NatC N(alpha)-terminal acetyltransferase
Gglean004959.1	PF00730.20	HhH-GPD superfamily base excision DNA repair protein
Gglean004961.1	PF00071.17;PF08477.8;PF00025.16;PF04670.7;PF00009.22;PF01926.18;PF09439.5	Ras family;; Miro-like protein;; ADP-ribosylation factor family;; Gtr1/RagA G protein conserved region;; Elongation factor Tu GTP binding domain;; 50S ribosome-binding GTPase;; Signal recognition particle receptor beta subunit
Gglean004966.1	PF13234.1	rRNA-processing arch domain
Gglean004967.1	PF08883.6	Dopa 4,5-dioxygenase family
Gglean004968.1	PF00122.15;PF00702.21;PF00689.16;PF13246.1;PF12710.2;PF00690.21;PF08282.7	E1-E2 ATPase;; haloacid dehalogenase-like hydrolase;; Cation transporting ATPase, C-terminus;; Putative hydrolase of sodium-potassium ATPase alpha subunit;; haloacid dehalogenase-like hydrolase;; Cation transporter/ATPase, N-terminus;; haloacid dehalogenase-like hydrolase
Gglean004969.1	PF01769.11	Divalent cation transporter
Gglean004970.1	PF04080.8	Per1-like
Gglean004972.1	PF13468.1	Glyoxalase-like domain
Gglean004973.1	PF03370.8	Putative phosphatase regulatory subunit
Gglean004976.1	PF07249.7	Cerato-platanin
Gglean004977.1	PF00753.22	Metallo-beta-lactamase superfamily
Gglean004978.1	PF07249.7	Cerato-platanin
Gglean004979.1	PF07249.7	Cerato-platanin
Gglean004980.1	PF01485.16	IBR domain
[truncated: 4,822 more rows]
