# Supplementary material for: De Novo Sequencing of a Sparassis latifolia Genome and Its Associated Comparative Analyses
Source: Can J Infect Dis Med Microbiol. 2018 Feb 25;2018:1857170. doi: 10.1155/2018/1857170 (PMC5845502; doi:10.1155/2018/1857170)
Supplement: Supplementary 5 — Appendix S4: results of dbCAN analysis. [file 1857170.f5.xlsx]

## Sheet: dbCAN analysis
Results of dbCAN analysis
	S.latifolia	P. placenta	F. pinicola	F. radiculosa	A. sinuosa	W. cocos	T. versicolor	L.tigrinus	P. chrysosporium	T. cinnabarina	A. subglabra	A. bisporus	P. carnosa	Ganoderma sp.	P. ostreatus	D. squalens	S. commune	B. adusta	C.subvermispora	N. crassa	T. mesenterica	C. neoformans	U. maydis	S. cerevisiae
AA1										1			4				1				3		2
AA1_1	3	3	5	2	5	3	7	9	1	4		12		16	11	11	2		7			1
AA1_2	1	2	1	1	1	1	1	1	1	1	1	1	2	1	1	1		2	1	2	1	3	1	2
AA1_3	1			1	1					1	6		2	1					1	8
AA10																							1
AA11			1	1	1	1	1	1			6			2		2	10	1		4	1	1
AA12									1		4	1	3		1			1		3
AA13																				1
AA2	2	1	2	2	2	2	27	23	17	11	22	5	12	11	9	14	2	21	17	6		2	3	1
AA3	4	7	4	3	7	3	2	4	7	5	5	5	15	6	2	4	3	6	2	7			3
AA3_1																				2
AA3_2	5	10	11	13	9	6	16	21	26	14	31	26	30	23	36	28	15	23	16	1	2	2	7
AA3_3	1	1	5	6	5	6	4	3	3	2	6	5	4	5	4	4	4	8	4	1
AA3_4	1				1		1	1	1	2	3						1	1
AA4	2		1		3	1	3	2	1	1	1	1	1	1	1	3	2	1	1	3		1	1	3
AA5	1		1	1	1	1	1	2	3	1	1	1	2	1	3	1		3	1	1			1
AA5_1	3	1	3	2	3	3	8	8	4	6	7	8	4	8	12	8	2	4	2		2	3	2
AA5_2																				1			1
AA6	1		1	1	1	1	1	2	4	1	4	4	4	2	2	1	4	4		1	1	2	1	3
AA7	3	5	14	5	7	12	11	20	13	5	15	14	24	14	23	11	12	10	10	18	2	1	6	1
AA8							2	2	2	1	1	1	2	1	1	2	1	2	2
AA9	2	4	4	2	2	2	18	16	16	17	20	11	11	16	28	15	22	27	9	13		1
CBM1				1			22	20	32	17	42	18	28	18	31	16	5	31	15	21
CBM12	1		1	1	1	2	1	1	1	1	4	1	1	1	1	1	2	1	1		1	1
CBM13	1	12	11	2		8	3	7	9	4	7	18	5	8	20	11	11	13	10	1	10	4
CBM16								1			2
CBM18		2	1	2	1	1	1	1				1		2	1	1	1	2	1	6	1	1	1	1
CBM19	2	2	2	1	1	2	6	7	3	5	1	3		4	1	6	1	1	2					1
CBM20	1	2	2	1	1	2	4	2	3	1	4	1	3	3	3	3	1	2	4	4	1	1
CBM21	3	3	2	2	2	1	2	2	2	2	3	1	2	2	2	2	2	2	2	2	2	2		4
CBM22					1								1				1
CBM24																				5
CBM26					1
CBM32	2		1		2	2	3	3	2	1	3	2	1	2	1	2	1	1	1		1	1		1
CBM35			1	1	2	1	2	1	1	1	2		1	1	1	1	1	1					1
CBM38																				1
CBM4															1								1
CBM40											2
CBM41						1
CBM42											2									1
CBM43	2	1	1	1	2	1	1	1	1	1	1	1	1	1	1	1	1	1	1	1	1	1	1	2
CBM44									1
CBM46			1
CBM47			1
CBM48	2	1	1	1	2	1	1	2	1	4	2	1	2	2	1	1	1	2	1	2	1	1	1	1
CBM5	2	5	3	3	3	2	5	5	4	4	9	3	3	8		4	2	3	3
CBM50	3		8	4	3	3	6	4	8	5	19	5	7	6	7	5	4	4	4	6	2	2	2
CBM52																				1
CBM6			1															1
CBM60											1
CBM63																	1						1
CBM66											1
CBM67											2				7		1					3
CBM76							1
CBM8								1			1	1			1	1
CE1	11	1	14	11	10	11	14	15	17	14	19	11	11	10	13	12	25	13	10	17	7	6	12	6
CE10	32	52	53	39	35	40	62	72	35	35	42	42	38	45	49	50	44	41	67	28	11	16	30	2
CE12	1	1	2	1	2	1	2	2	4	1	3	3	2	2	3	3	3	3		2	1	2		1
CE13																							2
CE14	1	1	1	1	1	1	1	1	1	1	1	1	1	1	1	1	1	1	1	1	1	1	1	1
CE15		2	1			1	2	2	2	2	5	1	3	2	1	2	2	2	2	1
CE16	5	5	11	4	3	5	8	14	7	6	30	10	5	17	9	13	11	14	6	2
CE2	1		2	2			1	1	1	1	1			1	1	1		1	1	1
CE3										1	3				1					4
CE4	3	6	5	3	4	5	5	7	6	5	13	10	4	8	12	6	9	5	5	5	8	4	8	2
CE5		2									3	6					2			3			4
CE7						1					1
CE8		3	2	2	2	1	2	4	2	2	3	2	2	3	2	3	2	2	2	2			1
CE9	1	3	1	1	1	1	1	1	1	1	1	1	1	1	1	1	1	1	1	1	1	1	1
GH1	2	2	2	2	1	1	2	2	2	2	1	1	2	3	3	4	3	2	3	2	1
GH10	1	4	3	3	2	4	6	6	6	6	4	2	5	8	3	5	5	4	6	4			2
GH102														1
GH105	2	1	4	2	2	2	3	4	4	2	12	5	4	4	4	3	8	3	3	2	1	3	2
GH106																						1
GH108								1												1
GH109	6	4	9	9	11	9	9	7	9	7	12	6	8	7	12	7	6	8	6	4	3	15	6	1
GH11									1		3	2	1		2		1		1	2			1
GH114											4						1			1		1
GH115	1		1	2	1	2	2	1	1	2	2	2	1	2	1	2	2	2	2	1		1	1
GH12	2	2	2	2	3	2	5	4	2	3	1	2	3	3	2	3	1	2	2	2
GH125	1		1	1	1	1	1	1	1	1	1	1	1	1	1	1	1	1	1	3			1
GH127			2	1	2	2	1	2	1		2	1	1	2	1	1	3	1	2
GH128	3	1	4	2	4	2	4	4	4	4	9	2	3	7	4	4	5	5	3	4	8	6	5
GH13_1	2	2	3	4	3	5	2	2	2	2	1	1	2	2	2	2	5	2	2	2	4	4
GH13_8		1
GH13_15							1	2	1		2	1	2	2	3	2	2	3	2
GH13_22	1		1	1	1	2	1	1	1	1	1	1	1	1	1	2	2	1	1	2	1	1
GH13_24																					1
GH13_25	1		1	1	1	1	1	1	1	1	1	1	1	1	1	1	1	2	1	1	1	1	1	1
GH13_30																						1
GH13_32										1
GH13_40									2			1	3		1		1	1		2	1	1	1	7
GH13_42													1
GH13_5	1		1	1	1	1	1	1	1	1	2	1		1	1	1	1	1		2	1	1	1
GH13_8	1		1	1	1	1	1	1	1	1	1	1	1	1	1	1	1	1	1	2	2	1	1	1
GH131			1				3	3	3	3	2	1	2	3	2	3	2	3	1	3
GH132																				2				5
GH135							2	1	1		4			1		2		2	2	1			1
GH140										2			1				1
GH142																				1			1
GH145							1	1	1	1	2	1	1	1		1	1	1	1	1
GH15	2	2	2	2	2	2	4	2	2	2	2	2	2	3	3	2	3	2	3	2	2	2	1	1
GH16	16	21	23	15	21	19	30	31	21	24	37	23	24	34	24	32	33	19	23	15	8	11	21	3
GH17	1		1		1	1	1	1	1	1	3	3	1	1	1	1	2	1	1	5	1	1	2	4
GH18	11	19	18	9	10	11	20	20	11	13	33	13	11	35	12	20	15	13	14	13	4	3	4	2
GH2	4	5	4	3	3	3	5	3	2	3	7	2	2	3	3	4	4	3	4	6	1		1
GH20	3	4	4	2	3	2	5	5	4	5	4	4	3	5	2	4	3	4	3	2	1	1	2
GH23	1	2	1	1	1	1	1	1	1	1	2	1	1	1	1	1	2	1	1		1	1	1
GH24												1			3				1
GH25							1	3	1		1	4		2	2	2	1	1	1	1			1
GH26																	1			1			1
GH27	3	2	4	3	2	3	3	3	3		2	4	3	3	6	5	1	3	4				1
GH28	3	8	12	8	6	9	10	12	5	7	13	5	4	10	6	7	3	6	6	2		1	1	1
GH29											3	1					2
GH3	7	9	11	7	8	8	12	9	10	7	12	8	11	13	12	8	12	8	6	10	2	7	3
GH30			2				1		1	1		1	2				2						2
GH30_3	2	3	4	1	2	2	3	2	1	2		2	1	2	2	2	3	1	1	1
GH30_4			1
GH30_5																				1
GH30_7											1
GH31	4	7	4	5	5	5	5	7	6	5	9	6	6	7	7	6	4	4	5	6	2	3	3	1
GH32			3				3	1		1	2			1	1	2	1			2		1	2	1
GH33			2	1	1		1	1			1					1						1		1
GH35	1	2	2	1	1	2	2	4	3	2	6	1	4	7	4	3	4	4	1	2			1
GH37	2	3		2	2	2	2	4	2	2	3	2	2	2	2	2	2	2	2	2	2	2	2	2
GH38	1		1	1	1	1	1	1	1	1	1	1	2	1	1	1	1	1	1	1	1	1	2	1
GH4							1										2
GH42																							1
GH43											1												1
GH43_1															1					1
GH43_11																				1
GH43_13											1	1			1		1
GH43_14			1						1				1					3
GH43_21																	1			2			2
GH43_23											1	1			1		1
GH43_24			1	1	1	1	1	1	1	1	1		1	1	1	1	2	1		1
GH43_25											1
GH43_26								1			8				2		5	1		1
GH43_30			4						1					3		1	1			1			1
GH43_33			1								1			1		1	1
GH43_36											1				1		1
GH43_5									1		1	2	1		1		1	1
GH43_6				2			2	3		2	12			7		4	5		2
GH44								1			1	1			1	1
GH45							1	1			2			1	2		1			1			3
GH46											1
GH47	6	7	5	6	4	5	5	5	5	5	12	7	5	6	9	5	6	6	4	9	3	3	3	3
GH5								1													1	1
GH5_11											1
GH5_12	2	4	2	2	2	2	2	2	2	2	2	2	3	2	2	2	2	2	2	1	3	2	2	1
GH5_15	1	1	1	1	1	1	1	2	1	1	6	1	1	2	1	1	1	1	1
GH5_16																				1			1
GH5_22	2	2	2	2	2	2	2	2	2	2	2	2	2	2	2	2	1	2	2		1	1
GH5_24																				1
GH5_27																					1
GH5_30											1	1			1
GH5_31	2		2	1	2	2	1	1	1		3		1			1		1	2
GH5_34											1
GH5_35																			1
GH5_41											2
GH5_49																								1
GH5_5	1	5	3	3	2	2	3	3	2	3	4	3	6	3	4	3	2	4	2	1
GH5_50	1	2	2	2	2	2	2	2	2	2		2	2	1	1	2	2	2	1		2	1	2
GH5_51											2
GH5_7	2	3	2	2	2	2	2	2	3	2	3	1	2	2	4	2	1	2	2	1			1
GH5_9	5	6	5	2	4	5	8	7	6	7	15	7	6	6	6	6	7	5	5	1	5	5	6	3
GH51	1	1	2	1	1	3	2	2	2	2	2	1	2	2	3	2	2	2	2	1		1	2
GH52											1
GH53	1	1	1	1	1	1	1	2	1		1	1	1	1	1	1	1	1	5	1
GH54																				1
GH55	2		3	3	3	3	2	2	2	2	5	1	2	3	2	2	2	3	2	6			1
GH6							1	1	1	1	2	1	1	1	3	1	1	1		3
GH62															1		1						1
GH63	1	1	1	2	1	1	2	2	1		2	2	1	2	2	2	2	2	1	2			1	2
GH64																				3
GH65																								1
GH67																				1
GH7							4	4	7	3	6	1	5	3	15	3	2	5	3	5
GH71	4	4	4	1	1	1	5	5	3	4	9	3	2	5	5	4	9	3	1	7	3	4
GH72	2	1	1	1	2	2	1	1	1	1	1	1	1	1	1	1	1	1	1	5	1	1	1	5
GH74			1		1	1	2	1	5	2	2	2	3	1	4	2	2	3	1	2	1	1	1	5
GH75											3									1
GH76			2					2		2	7	1	2	2	3	1	6	2		10			1	2
GH78		1	6	4	2	5	4	4	1	2	4	4	1	3	2	4	3	2	6	2		3
GH79	3		3	2	3	3	11	11	7	10	13	6	4	12	7	13	2	7	8	2	1	4	1
GH8																							1
GH81											5						1			1				2
GH85	1	1	1	1	1	1	1	1	1	1	1	1	1	1	1	1	1	1	1				1
GH88	2	1	1	1	1	1	1	1	1	1	2	1	1	1	1	1	1	1	1			2
GH89			2	1	1	1	1	1	2	1	1		1	2		1		1	2
GH9							1	1	1	1		1	1	1	1		1	1		1	1		1
GH92	2		5	2	3	3	4	5	4	4	7	5	4	4	6	5	5	3	3	2	1	1	3
GH93								1			1			1		1	2			2
GH94											1									1
GH95	1	3	1	1	1	1	1	1	1	1	1	1	1	2	1	1	1	1	1
GH99							1	1		1	1			1	1	1
GT1	1		3	1	1	1	18	6	5	12	4	2	4	6	1	6	6	5	5	6	9	2	3	1
GT15	3	1	5	3	3	3	5	3	2	3	2	3	4	3	4	6	6	3	2	5	1	1	2	9
GT17			1		1	1	1	1	1	1	1	1		1	1	1	1			1			1
GT18															2		1				1
GT2	12	8	14	11	10	11	13	11	13	11	12	10	10	13	10	11	11	11	11	11	8	7	9	4
GT20	4		3	3	3	3	3	3	3	3	3	3	3	3	3	3	3	3	3	3	2	2	3	4
GT21	1		1	1	1	1	2	1	1	1	1	1	1	1	1	1	1	1	1	1	1	1	1
GT22	3	1	5	3	4	4	4	5	4	3	2	3	5	4	3	3	3	4	3	4	3	4	4	4
GT23	1				1				1		1	1	1					1	1
GT24	1		1	1	1	1	1	1	1	1	1	1	1	1	1	1	1	1	1	1	1	1	1	1
GT25	1	1	1	1	1	1	1	1	1	1		1	1	1	1	1	2	1	1	2
GT26																	1
GT28	1		2	1	1	2	2	2	1	2	1	1	1	2	1	2	1		1	2	1	1	1	1
GT3	1		1	1	1	1	2	1	1	1	1	1	1	1	1	1	1	1	1	4	1	1	1	2
GT31	1		1		1	1	1	1	1	1	4	1	1	1	1	1	1	1	1	2	3	2	3
GT32	4	2	3	3	3	3	4	4	5	4	5	4	4	4	3	4	6	4	4	4	11	9	2	4
GT33	1		1	1	1	1	1	1	1	1	1	1	1	1	1	1	1	1	1	1	1	1	1	1
GT34											1									3	1			2
GT35	1		1	1	1	1	1	1	1	1	1	1	1	1	1	1	1	1	1	1	1	1		1
GT39	3		3	3	3	3	3	4	3	3	3	3	3	3	3	3	3	3	3	4	3	3	3	7
GT4	4	1	4	4	4	4	4	4	4	4	8	4	5	4	4	5	4	4	4	6	5	5	4	3
GT41		1	2	1	2	1	1									1				1
GT44											1
GT47																					1	1
GT48	2		2	2	2	2	2	3	2	2	2	2	2	2	2	2	2	2	2	1	1	1	1	3
GT49	1		1	1	1	1	1	1	1	1		1	1	1	1	1	1	1	1
GT50	1		1	1	1	1	1	1	1	1	1	1	2	1	1	1	1	1	1	1	1	1	1	1
GT55																				1
GT57	2		2	1	2	2	2	2	2	2	2	2		2	2	2	2	2	2	2			2	2
GT58	1		1	1	1	1	1	1	1	1	1	1	1	1	1	1	1	1	1	1	1	1	1	1
GT59	1		1	1	1	1	1	1	1	1	1	1	1	1	1	1	1	1	1	1			1	1
GT61																						1
GT62																				3				3
GT65	1	4	4	1	2	4	4	2	2	2	3	2	4	2	2	3	2	3		1	1	1
GT66		1	1	1	1	1	1	1	1	1	1	1	1	1	1	1	1	1	1	1	1	1	1	1
GT68	1		1	3	2	1	1	1	2	1	3	1	2	3	2	1	2	1	2
GT69	2	3	3	3	3	3	3	4	3	3	7	2	3	4	2	3	3	3	2	2	4	4	3
GT71																				1	2	2	2	6
GT76	1		1	1	1	1	1	1	1	1	1	1	1	1	1	1	1	1	1	1	1	1	1	1
GT77																				1
GT8	6	8	7	8	7	8	5	8	8	4	4	2	7	6	7	5	5	8	6	4	4	5	2	4
GT83	1
GT87					1											1
GT90	1		1	1	1	1	1	1	1	1	2	3	1	1	4	1	6	1	1	5	8	7	5
PL1										1					1
PL1_2											1	1
PL1_4																							1
PL1_7											1	1						1		1
PL1_10															1		1
PL1_2															1		1
PL1_6															1		1
PL1_7															5		2
PL1_9															1
PL10											1
PL12	1				1			2	1	2		1	1	1	1	1	1	1			1	1
PL14		1	1	1	1	1	1	1									1		1
PL14_3											4					1		1
PL14_4	2				1		4	4	4	4	9	3	3	5	3	5		3	2		1	1
PL14_5	3		2	1	1	1	1	2	1	1	1	1	1	1	1	1	1	1	1		1	1
PL15			1			1	2				2		1	1		1			1
PL17_2																		1
PL20											1									1
PL26											1	1			1		1
PL3_2											1	1			3		4	2		1
PL3_4								1
PL4_1								1			1	1			2		3	1		1
PL4_3							1	1		1						1						1
PL5											2							1				1
PL15_1		1
PL7											1
PL8							2	3	1	2	2	1	1	3	4	3	1	1	2
PL9_3																	1
