# Supplementary material for: De Novo Sequencing of a Sparassis latifolia Genome and Its Associated Comparative Analyses
Source: Can J Infect Dis Med Microbiol. 2018 Feb 25;2018:1857170. doi: 10.1155/2018/1857170 (PMC5845502; doi:10.1155/2018/1857170)
Supplement: Supplementary 6 — Appendix S5: comparing CAZymes involved in cellulose and hemicellulose degradation. [file 1857170.f6.xlsx]

## Sheet: cellulose  degradation
CAZymes involved in cellulose degradation
	AA9	CBM1	GH1	GH12	GH3	GH44	GH45	GH5	GH6	GH7	Total
S.latifolia	2	0	2	2	7	0	0	16	0	0	29
P. placenta	4	0	2	2	9	0	0	23	0	0	40
F. pinicola	4	0	2	2	11	0	0	19	0	0	38
F. radiculosa	2	1	2	2	7	0	0	15	0	0	29
A. sinuosa	2	0	1	3	8	0	0	17	0	0	31
W. cocos	2	0	1	2	8	0	0	18	0	0	31
L.tigrinus	16	20	2	4	9	1	1	22	1	4	80
P. chrysosporium	16	32	2	2	10	0	0	19	1	7	89
A. subglabra	11	18	1	2	8	1	0	19	1	1	62
B. adusta	20	42	1	1	12	1	2	42	2	6	129
C.subvermispora	27	31	2	2	8	0	0	19	1	5	95
Ganoderma sp.	9	15	3	2	6	0	0	18	0	3	56
P. ostreatus	16	18	3	3	13	0	1	18	1	3	76
S. commune	28	31	3	2	12	1	2	21	3	15	118
P. carnosa	22	5	3	1	12	0	1	16	1	2	63
T. cinnabarina	11	28	2	3	11	0	0	23	1	5	84
T. versicolor	17	17	2	3	7	0	0	19	1	3	69
D. squalens	2	0	1	2	8	0	0	18	0	0	31
S. cerevisiae	15	16	4	3	8	1	0	19	1	3	70
T. mesenterica	0	0	0	0	0	0	0	5	0	0	5
U. maydis	0	0	1	0	2	0	0	13	0	0	16
N. crassa	0	0	0	0	3	0	3	12	0	0	18
A. bisporus	13	21	2	2	10	0	1	6	3	5	63
C. neoformans	1	0	0	0	7	0	0	10	0	0	18
Note: brown-rot species are marked by red color, and white-rot species are markd by green color.

## Sheet: hemicellulose degradation
CAZymes involved in hemicellulose degradation
		S.latifolia	P. placenta	F. pinicola	F. radiculosa	A. sinuosa	W. cocos	L.tigrinus	P. chrysosporium	A. subglabra	B. adusta	C.subvermispora	Ganoderma sp.	P. ostreatus	S. commune	P. carnosa	T. cinnabarina	T. versicolor	D. squalens	T. mesenterica	S. cerevisiae	U. maydis	N. crassa	C. neoformans	A. bisporus
Xyloglucan	GH12	2	2	2	2	3	2	4	2	1	2	2	3	2	1	3	3	5	3	0	0	0	2	0	2
	GH2	4	5	4	3	3	3	3	2	7	3	4	3	3	4	2	3	5	4	1	0	1	6	0	2
	GH27	3	2	4	3	2	3	3	3	2	3	4	3	6	1	3	0	3	5	0	0	1	0	0	4
	GH29	0	0	0	0	0	0	0	0	3	0	0	0	0	2	0	0	0	0	0	0	0	0	0	1
	GH31	4	7	4	5	5	5	7	6	9	4	5	7	7	4	6	5	5	6	2	1	3	6	3	6
	GH35	1	2	2	1	1	2	4	3	6	4	1	7	4	4	4	2	2	3	0	0	1	2	0	1
	GH51	1	1	2	1	1	3	2	2	2	2	2	2	3	2	2	2	2	2	0	0	2	1	1	1
	GH54	0	0	0	0	0	0	0	0	0	0	0	0	0	0	0	0	0	0	0	0	0	1	0	0
	GH74	0	0	1	0	1	1	1	5	2	3	1	1	4	2	3	2	2	2	1	5	1	2	1	2
	GH95	1	3	1	1	1	1	1	1	1	1	1	2	1	1	1	1	1	1	0	0	0	0	0	1
Xylan	CE1	11	1	14	11	10	11	15	17	19	13	10	10	13	25	11	14	14	12	7	6	12	17	6	11
	GH2	4	5	4	3	3	3	3	2	7	3	4	3	3	4	2	3	5	4	1	0	1	6	0	2
	GH3	7	9	11	7	8	8	9	10	12	8	6	13	12	12	11	7	12	8	2	0	3	10	7	8
	GH10	1	4	3	3	2	4	6	6	4	4	6	8	3	5	5	6	6	5	0	0	2	4	0	2
	GH11	0	0	0	0	0	0	0	1	3	0	1	0	2	1	1	0	0	0	0	0	1	2	0	2
	GH27	3	2	4	3	2	3	3	3	2	3	4	3	6	1	3	0	3	5	0	0	1	0	0	4
	GH35	1	2	2	1	1	2	4	3	6	4	1	7	4	4	4	2	2	3	0	0	1	2	0	1
	GH43	0	0	7	3	1	1	5	4	28	6	2	12	8	19	3	3	3	7	0	0	4	7	0	4
	GH51	1	1	2	1	1	3	2	2	2	2	2	2	3	2	2	2	2	2	0	0	2	1	1	1
	GH67	0	0	0	0	0	0	0	0	0	0	0	0	0	0	0	0	0	0	0	0	0	1	0	0
	GH115	1	0	1	2	1	2	1	1	2	2	2	2	1	2	1	2	2	2	0	0	1	1	1	2
	GH30	2	3	7	1	2	2	2	2	1	1	1	2	2	5	3	3	4	2	0	0	2	2	0	3
Galactomannan	GH2	4	5	4	3	3	3	3	2	7	3	4	3	3	4	2	3	5	4	1	0	1	6	0	2
	GH5	16	23	19	15	17	18	22	19	42	19	18	18	21	16	23	19	21	19	13	5	12	6	10	19
	GH26	0	0	0	0	0	0	0	0	0	0	0	0	0	1	0	0	0	0	0	0	1	1	0	0
	GH27	3	2	4	3	2	3	3	3	2	3	4	3	6	1	3	0	3	5	0	0	1	0	0	4
	GH35	1	2	2	1	1	2	4	3	6	4	1	7	4	4	4	2	2	3	0	0	1	2	0	1
	Total	71	81	104	73	71	85	107	102	176	97	86	121	121	127	102	84	109	107	28	17	55	88	30	86
Note: brown-rot species are marked by red color, and white-rot species are markd by green color.
