# Supplementary material for: De Novo Sequencing of a Sparassis latifolia Genome and Its Associated Comparative Analyses
Source: Can J Infect Dis Med Microbiol. 2018 Feb 25;2018:1857170. doi: 10.1155/2018/1857170 (PMC5845502; doi:10.1155/2018/1857170)
Supplement: Supplementary 10 — Appendix S9: two 1,3-β-glucan synthases Gglean008387.1 and Gglean007995.1. [file 1857170.f10.xlsx]

## Sheet: Sheet1
Gglean007995.1							Gglean008387.1
Transmembrane domain of the β-glucan synthase protein
was analyzed by Phobius software (http://phobius.sbc.su.se/)
