# Supplementary material for: De Novo Sequencing of a Sparassis latifolia Genome and Its Associated Comparative Analyses
Source: Can J Infect Dis Med Microbiol. 2018 Feb 25;2018:1857170. doi: 10.1155/2018/1857170 (PMC5845502; doi:10.1155/2018/1857170)
Supplement: Supplementary 11 — Appendix S10: the glucan synthase domain of S. latifolia 1,3-β-glucan synthases were highly homologous to Fks1p. [file 1857170.f11.xlsx]

## Sheet: Sheet1
The Glucan synthase domain of S. latifolia 1,3-β-glucan synthases were highly homologous to Fks1p . The amino acid residues being reported to affect the catalytic activity of Fks1p were mostly conserved in both two S. latifolia β-glucan synthases.
